# Supplementary material for: Catalytic asymmetric aminolactonization of 1,2-disubstituted alkenoic acid esters: Efficient construction of aminolactones with an all-carbon quaternary stereo-centre
Source: Royal Society of Chemistry journal article supplement (doi:10.1039/c4cc01944j), 2014-01-01
Supplement: c4cc01944j1.pdf [file c4cc01944j1.pdf]

## Electronic Supplementary Information

### Catalytic asymmetric aminolactonization of 1,2-disubstituted alkenoic acid esters: Efficient construction of aminolactones with all carbons quaternary stereo-centre

Saumen Hajra,\* Sk Md Samim Akhtar and Sk Mohammad Aziz

Department of Chemistry, Indian Institute of Technology Kharagpur, Kharagpur, India

#### Experimental Section

|                                                                                                                                                                                                                                |     |
|--------------------------------------------------------------------------------------------------------------------------------------------------------------------------------------------------------------------------------|-----|
| A) General                                                                                                                                                                                                                     | S2  |
| B) General procedure for the preparation of 4-arylbut-3-enoic acid                                                                                                                                                             | S2  |
| C) General procedure for the preparation of <i>tert</i> -butyl 4-arylbut-3-enoate                                                                                                                                              | S3  |
| D) General procedure for the preparation of ( <i>E</i> )- <i>tert</i> -butyl 5-arylpent-4-enoate                                                                                                                               | S3  |
| E) General Procedure for one-pot enantioselective Synthesis of<br><i>N</i> -nosyl-4-amino-5-arylbutyrolactones and <i>N</i> -nosyl-5-amino-6-<br>arylvalerolactones ( <b>3a-i</b> , <b>10</b> , <b>7a-d</b> and <b>13a-d</b> ) | S4  |
| F) Spectral Data of <i>N</i> -nosyl-4-amino-5-arylbutyrolactones and<br><i>N</i> -nosyl-5-amino-6-arylvalerolactones ( <b>3a-i</b> , <b>10</b> , <b>7a-d</b> and <b>13a-d</b> )                                                | S4  |
| G) Spectral Data of alkenoic acid esters ( <b>1a-i</b> , <b>8</b> , <b>5a-d</b> , <b>11a-d</b> and <b>1a'</b> )                                                                                                                | S10 |
| H) Synthesis and Spectral Data of compounds <b>14-16</b> and <b>2a'</b>                                                                                                                                                        | S12 |
| I) References                                                                                                                                                                                                                  | S14 |
| J) NMR Spectra                                                                                                                                                                                                                 | S15 |
| K) 1D-nOe Spectra of compound <b>13a</b>                                                                                                                                                                                       | S46 |
| L) HPLC Chromatograms                                                                                                                                                                                                          | S49 |

### A) General:

All reactions were conducted using oven-dried glassware under an atmosphere of Argon (Ar). Commercial grade reagents were used without further purification. Solvents were dried and distilled following usual protocols. Flash chromatography was carried out using silica gel (230-400 mesh). TLC was performed on aluminium-backed plates coated with silica gel 60 with F<sub>254</sub> indicator.

The <sup>1</sup>H NMR spectra were recorded with a 200 and a 400 MHz and <sup>13</sup>C NMR spectra were recorded with a 50 and a 100 MHz using CDCl<sub>3</sub>, d<sub>6</sub>-DMSO and CD<sub>3</sub>OD. <sup>1</sup>H NMR chemical shifts are expressed in parts per million (δ) relative to CHCl<sub>3</sub> (d = 7.26), d<sub>6</sub>-DMSO (δ = 2.48) and CD<sub>3</sub>OD (δ = 3.34); <sup>13</sup>C NMR chemical shifts are expressed in parts per million (δ) relative to the CDCl<sub>3</sub> resonance (δ = 77.0), d<sub>6</sub>-DMSO (δ = 40.1) and CD<sub>3</sub>OD (δ = 49.2). Highresolution mass spectra (HRMS) were obtained under positive electron spray ionization (m/z values are given). HPLC analyses were done by Chiralpak IA column and IC column (4.6 mm × 250 mm and particle size 5μm and 3μm). Specific optical rotation values were measured on a Jasco-P1200 polarimeter. NOE experiment was done in 500 MHz NMR.

### B) General procedure for the preparation of 4-arylbut-3-enoic acid:

(2-carboxyethyl)triphenylphosphonium bromide (1.2 eq) was suspended in dry THF. Aryl aldehyde (1 eq) was added. The mixture was cooled to – 78 °C, then a solution of <sup>t</sup>BuOK (2.5 eq) in dry THF was added continuously over 2 h. The reaction was stirred for 12-18 h during which it was allowed to warm to RT. The reaction was monitored by TLC analysis and after completion of the reaction THF was evaporated. 100 mL H<sub>2</sub>O and 100 mL DCM was added. Aqueous layer was separated and acidified with 1(N) HCl up to pH=1. 100 ml Et<sub>2</sub>O was added. The layers were separated and the aqueous layer was extracted with Et<sub>2</sub>O (2 x100 mL). The combined organic layers were dried over Na<sub>2</sub>SO<sub>4</sub> and the solvent was removed in vacuum (40 °C). After flash chromatography on silica gel with hexane/EtOAc (3:1) 4-arylbut-3-enoic acids were obtained as a yellow solid (yield 50-65%).

### C) General procedure for the preparation of *tert*-butyl 4-arylbut-3-enoate<sup>1</sup>:

In a two-necked flask equipped with a magnetic stirring bar, anhydrous  $\text{MgCl}_2$  (0.10 eq),  $\text{BOC}_2\text{O}$  (1.3 eq) and 4-arylbut-3-enoic acid (1.0 eq) were dissolved in  $t\text{BuOH}$  (2.0eq). The mixture was stirred at  $40\text{ }^\circ\text{C}$  and for 2-3 days and monitored by TLC analysis. The crude reaction mixture was diluted with  $\text{H}_2\text{O}$  (10 mL) and extracted with  $\text{EtOAc}$  (3 x 10 mL). The organic layer was separated, dried ( $\text{MgSO}_4$ ) and filtered, and the solvent was removed by rotary evaporation. The crude mixture was then subjected for column chromatography on silica gel with light petroleum ether/ $\text{Et}_2\text{O}$  (9:1). The *tert*-butyl 4-arylbut-3-enoate esters **1a-g** were obtained as light yellow oil (yield 85-95%).

### D) General procedure for the preparation of (*E*)-*tert*-butyl 5-arylpent-4-enoate<sup>2</sup>:

To a heat-dried two-necked round-bottomed flask were added freshly distilled diisopropylamine (1.05 eq) and dry THF under argon. This solution was cooled to  $-78\text{ }^\circ\text{C}$ , and  $n\text{-BuLi}$  (2.5 M in hexane, 1.05 eq) was then added via syringe. The mixture was stirred for 45 min, followed by addition of *tert*-butyl acetate (1 eq). The reaction mixture was stirred for 1 h. The resulting ester enolate-solution was slowly added at  $-78\text{ }^\circ\text{C}$  to the solution of bromide (1 eq) in THF via syringe. After stirring for 4 h at  $-78\text{ }^\circ\text{C}$  the reaction mixture was quenched by addition of saturated  $\text{NH}_4\text{Cl}$  solution and allowed to warm up to room temperature. Then THF was evaporated and the aqueous layer was extracted with  $\text{EtOAc}$ . The combined extractes were dried over anhydrous  $\text{MgSO}_4$ , and concentrated under reduced

pressure. Flash chromatography on silica gel eluting with light petroleum ether/Et<sub>2</sub>O (9:1) furnished (*E*)-tert-butyl 5-arylpent-4-enoate esters **5a-b** light yellow oil (yield 70-75%).

Aziridine reagents PhINSO<sub>2</sub>(4-NO<sub>2</sub>-C<sub>6</sub>H<sub>4</sub>) [PhINNs] were prepared by literature procedure.<sup>3</sup>

C2-symmetric bis-oxazoline ligands **4a-g** were synthesized by following literature procedure.<sup>4</sup>

**E) General Procedure for one-pot enantioselective Synthesis of *N*-nosyl-4-amino-5-arylbutyrolactones and *N*-nosyl-5-amino-6-arylvalerolactones<sup>5</sup> (**3a-g**, **10**, **7a-b**):**

A 10 mL two-necked round bottom flask was charged with bis-oxazoline ligand **4g** (0.010g, 0.0279 mmol, 0.12 equiv), Cu(OTf)<sub>2</sub> (0.009 g, 0.0248 mmol, 0.10 equiv) and 0.2 g of powdered molecular sieves (4Å). Anhydrous chloroform (1.2 mL) was injected and the resulting mixture was stirred for 30 min at rt. Then the reaction mixture was placed at 40° C and to this solution, substrate **1** (0.389 g, 1.23 mmol, 5.0 equiv) in 1.2 mL chloroform, PhINNs (0.100 g, 0.247 mmol, 1.0 equiv) were added and the reaction mixture was allowed to stir at 40 °C under an argon atmosphere. As soon as all the nitrenoid reagent dissolved in the reaction medium, an additional amount of Cu(OTf)<sub>2</sub> (0.005 g, 0.0138 mmol) or ~ 0.2 g of silica gel (60-120 mesh) was added. On completion, the reaction was quenched by diluting with ethyl acetate (10 mL) and filtering through a short plug of silica gel. The silica gel was washed with additional 10 mL of ethyl acetate. The filtrate was concentrated by rotary evaporation under reduced pressure. The crude mass was subjected to purification by flash column chromatography using EtOAc/hexane as an eluent, which provided pure arylbutyrolactones and arylvalerolactones.

**F) Spectral Data of *N*-nosyl-4-amino-5-arylbutyrolactones and *N*-nosyl-5-amino-6-arylvalerolactones (**3a-i**, **10**, **7a-d** and **13a-d**):**

**4-nitro-*N*-((2*S*, 3*R*)-5-oxo-2-phenyltetrahydrofuran-3-yl)benzenesulfonamide(**3a**):** White solid (0.072 g; 80%). M.p. 158-160 °C. **FTIR** (KBr, cm<sup>-1</sup>): 3369, 2949, 2838, 1652, 1453, 1415, 1113, 1021. **<sup>1</sup>H NMR** (CDCl<sub>3</sub>, 200 MHz): δ 8.22 (d, *J* = 8.8 Hz, 2H), 7.88 (d, *J* = 8.8 Hz, 2H), 7.41-7.30 (m, 3H), 7.20-7.16 (m, 2H), 5.58 (d, *J* = 8.2 Hz, 1H), 5.27 (d, *J* = 4.8 Hz, 1H), 4.16-4.12 (m, 1H), 3.04-2.92 (dd, *J* = 7.4, 17.4 Hz, 1H), 2.56-2.44 (dd, *J* = 6, 17.8 Hz,

1H). <sup>13</sup>C NMR (CDCl<sub>3</sub>, 50 MHz): δ 173.0 (C=O), 150.7, 147.2, 140.1, 128.5(2C), 128.1(2C), 127.3(2C), 125.2(2C), 123.6, 84.4, 59.6, 30.9. [α]<sub>D</sub><sup>32</sup> = -5.42 (c 0.1, Me<sub>2</sub>CO) for 87% ee (**HPLC**: Daicel Chiralpak IA(particle size 5μm), hexane/EtOAc = 65/35, 1.0 ml/min, 254 nm, major 15.06 min and minor 10.71 min). HRMS (ESI) calcd for C<sub>16</sub>H<sub>14</sub>N<sub>2</sub>O<sub>6</sub>NaS 385.0470, m/z [M+Na]<sup>+</sup>, found 385.0484.

*N*-((2*S*, 3*R*)-2-(4-fluorophenyl)-5-oxotetrahydrofuran-3-yl)-4-nitrobenzenesulfonamide (**3b**): White solid (0.059 g; 63%). M.p. 134-136 °C. **FTIR** (KBr, cm<sup>-1</sup>): 3400, 2950, 2840, 1651, 1453, 1412, 1113, 1021. <sup>1</sup>H NMR (d<sub>6</sub>-DMSO, 200 MHz): δ 8.94 (d, *J* = 7.2 Hz, 1H), 8.29 (d, *J* = 8.6 Hz, 2H), 7.86 (d, *J* = 8.6 Hz, 2H), 7.49-7.40 (m, 2H), 7.29-7.23 (m, 2H), 5.29 (d, *J* = 4.4 Hz, 1H), 4.32-4.29 (m, 1H), 2.99-2.84 (dd, *J* = 6.8, 17.4 Hz, 2H). <sup>13</sup>C NMR (d<sub>6</sub>-DMSO, 100 MHz): δ 175.7 (C=O), 162.2 (d, <sup>1</sup>*J*<sub>C,F</sub> = 242.9 Hz), 150.0, 146.8, 134.5, 128.7 (d, <sup>3</sup>*J*<sub>C,F</sub> = 8.3 Hz), 128.2 (2C), 125.1 (2C), 116.1 (d, <sup>2</sup>*J*<sub>C,F</sub> = 21.4 Hz), 87.4, 56.9, 37.5. [α]<sub>D</sub><sup>32</sup> = -11.36 (c 0.1, Me<sub>2</sub>CO) for 90% ee (**HPLC**: Daicel Chiralpak IA(particle size 5μm), hexane/EtOAc = 65/35, 1.0 ml/min, 254 nm, major 18.88 min and minor 12.92 min). HRMS (ESI) calcd for C<sub>16</sub>H<sub>13</sub>FN<sub>2</sub>O<sub>6</sub>NaS 403.0376, m/z [M+Na]<sup>+</sup>, found 403.0389.

*N*-((2*S*, 3*R*)-2-(4-chlorophenyl)-5-oxotetrahydrofuran-3-yl)-4-nitrobenzenesulfonamide (**3c**): White solid (0.067 g; 68%). M.p. 146-148 °C. **FTIR** (KBr, cm<sup>-1</sup>): 3391, 2952, 2839, 1648, 1453, 1411, 1111, 1051, 1015. <sup>1</sup>H NMR (d<sub>6</sub>-DMSO, 200 MHz): δ 8.92 (d, *J* = 6.8 Hz, NH), 8.21 (d, *J* = 8.6 Hz, 2H), 7.79 (d, *J* = 8.6 Hz, 2H), 7.45-7.26 (m, 4H), 5.10 (d, *J* = 7.2 Hz, 1H), 4.26-4.14 (m, 1H), 2.81-2.69 (dd, *J* = 7.2, 17 Hz, 2H). <sup>13</sup>C NMR (d<sub>6</sub>-DMSO, 100 MHz): δ 173.5 (C=O), 149.9, 146.5, 137.2, 134.1(2C), 129.4 (2C), 128.9, 128.4 (2C), 125.0 (2C), 83.4, 56.9, 37.2. [α]<sub>D</sub><sup>32</sup> = -8.79 (c 0.09, Me<sub>2</sub>CO) for 86% ee (**HPLC**: Daicel Chiralpak IA(particle size 5μm), hexane/EtOAc = 65/35, 1.0 ml/min, 254 nm, major 17.68 min and minor 10.23 min). HRMS (ESI) calcd for C<sub>16</sub>H<sub>12</sub>ClN<sub>2</sub>O<sub>6</sub>S 395.0105, m/z [M-H]<sup>-</sup>, found 395.0109.

*N*-((2*S*, 3*R*)-2-(2-chlorophenyl)-5-oxotetrahydrofuran-3-yl)-4-nitrobenzenesulfonamide (**3d**): White solid (0.056 g; 57%). M.p. 122-124 °C. **FTIR** (KBr, cm<sup>-1</sup>): 3437, 2952, 2841, 1647, 1452, 1410, 1151, 1112, 1017. <sup>1</sup>H NMR (d<sub>6</sub>-DMSO, 200 MHz): δ 8.96 (d, *J* = 8.6 Hz, 1H), 8.25 (d, *J* = 8 Hz, 2H), 7.86 (d, *J* = 8 Hz, 2H), 7.55-7.38 (m, 4H), 5.50 (d, *J* = 6.6 Hz, 1H), 4.59-4.54 (m, 1H), 2.93-2.80 (dd, *J* = 7, 17.4 Hz, 2H). <sup>13</sup>C NMR (d<sub>6</sub>-DMSO, 100 MHz): δ 173.7 (C=O), 149.9, 146.4, 135.1, 133.9, 132.9, 131.1, 129.3, 128.1 (2C), 127.1, 124.9

(2C), 85.7, 56.3, 36.8.  $[\alpha]_D^{32} = -9.92$  (c 0.1, Me<sub>2</sub>CO) for 94% ee (**HPLC**: Daicel Chiralpak IA (particle size 5 μm), hexane/EtOAc = 65/35, 1.0 ml/min, 254 nm, major 9.90 min and minor 10.61 min). HRMS (ESI) calcd for C<sub>16</sub>H<sub>12</sub>ClN<sub>2</sub>O<sub>6</sub>S 395.0105, m/z [M-H]<sup>-</sup>, found 395.0097.

**N-((2S, 3R)-2-(2-bromophenyl)-5-oxotetrahydrofuran-3-yl)-4-nitrobenzenesulfonamide (3e)**: White solid (0.061 g; 56%). M.p. 130-132 °C. **FTIR** (KBr, cm<sup>-1</sup>): 3411, 2951, 2842, 1649, 1529, 1454, 1409, 1159, 1109, 1020. **<sup>1</sup>H NMR** (CDCl<sub>3</sub>, 400 MHz): δ 8.20 (d, *J* = 8.8 Hz, 2H), 7.91 (d, *J* = 8.4 Hz, 2H), 7.39-7.16 (m, 4H), 5.50 (d, *J* = 4.8 Hz, 1H), 4.56 (d, *J* = 5.6 Hz, 1H), 4.09-4.08 (m, 1H), 2.89-2.83 (dd, *J* = 7.6, 17.6 Hz, 1H), 2.78-2.72 (dd, *J* = 6, 17.6 Hz, 1H). **<sup>13</sup>C NMR** (d<sub>6</sub>-DMSO, 100 MHz): δ 173.8 (C=O), 150.1, 146.6, 135.6, 133.6, 131.6, 131.0, 129.7, 128.8 (2C), 127.5, 125.2 (2C), 83.4, 55.9, 35.8.  $[\alpha]_D^{32} = -6.65$  (c 0.09, Me<sub>2</sub>CO) for 80% ee (**HPLC**: Daicel Chiralpak IA (particle size 5 μm), hexane/EtOAc = 65/35, 1.0 ml/min, 254 nm, major 9.72 min and minor 10.74 min). HRMS (ESI) calcd for C<sub>16</sub>H<sub>12</sub>BrN<sub>2</sub>O<sub>6</sub>S 438.9599, m/z [M-H]<sup>-</sup>, found 438.9608.

**N-((2S, 3R)-2-(3-bromophenyl)-5-oxotetrahydrofuran-3-yl)-4-nitrobenzenesulfonamide (3f)**: White solid (0.068 g; 62%). M.p. 168-170 °C. **FTIR** (KBr, cm<sup>-1</sup>): 3400, 2950, 2842, 1653, 1454, 1412, 1114, 1020. **<sup>1</sup>H NMR** (d<sub>6</sub>-DMSO, 200 MHz): δ 8.98 (s, NH), 8.28 (d, *J* = 7.2 Hz, 2H), 7.88 (d, *J* = 7.4 Hz, 2H), 7.54-7.37 (m, 3H), 7.31-7.24 (m, 1H), 5.50 (d, *J* = 6.2 Hz, 1H), 4.40 (m, 1H), 2.91-2.79 (dd, *J* = 8, 17.6 Hz, 2H). **<sup>13</sup>C NMR** (d<sub>6</sub>-DMSO, 100 MHz): δ 173.7 (C=O), 149.9, 146.4, 135.4, 133.4, 131.4, 129.6, 128.7, 128.3 (2C), 125.0 (2C), 123.4, 83.3, 55.7, 35.6.  $[\alpha]_D^{32} = -4.94$  (c 0.1, Me<sub>2</sub>CO) for 82% ee (**HPLC**: Daicel Chiralpak IA (particle size 5 μm), hexane/EtOAc = 65/35, 1.0 ml/min, 254 nm, major 9.78 min and minor 10.47 min). HRMS (ESI) calcd for C<sub>16</sub>H<sub>13</sub>BrN<sub>2</sub>O<sub>6</sub>NaS 462.9575, m/z [M+Na]<sup>+</sup>, found 462.9575.

**N-((2S, 3R)-2-(4-methoxyphenyl)-5-oxotetrahydrofuran-3-yl)-4-nitrobenzenesulfonamide (3g)**: White solid (0.084 g; 87%). M.p. 164-166 °C. **FTIR** (KBr, cm<sup>-1</sup>): 3427, 2948, 2845, 1646, 1530, 1451, 1410, 1277, 1113, 1049, 1018. **<sup>1</sup>H NMR** (d<sub>6</sub>-DMSO, 200 MHz): δ 8.86 (s, NH), 8.21 (d, *J* = 8.8 Hz, 2H), 7.79 (d, *J* = 8.6 Hz, 2H), 7.17 (d, *J* = 8.6 Hz, 2H), 6.77 (d, *J* = 6.8 Hz, 2H), 5.04 (d, *J* = 7.8 Hz, 1H), 4.25-4.21 (m, 1H), 3.73 (s, 3H), 2.88-2.75 (dd, *J* = 8.2, 17.6 Hz, 2H). **<sup>13</sup>C NMR** (d<sub>6</sub>-DMSO, 100 MHz): δ 173.8 (C=O), 160.3, 149.9, 146.7,

129.3 (2C), 128.4 (4C), 125.0 (2C), 114.4, 84.4, 56.9, 55.7, 36.5.  $[\alpha]_D^{32} = -7.15$  (c 0.09, Me<sub>2</sub>CO) for 77% ee (**HPLC**: Daicel Chiralpak IA (particle size 5 μm), hexane/EtOAc = 65/35, 0.8 ml/min, 254 nm, major 27.06 min and minor 17.56 min). HRMS (ESI) calcd for C<sub>17</sub>H<sub>16</sub>N<sub>2</sub>O<sub>7</sub>NaS 415.0576, m/z [M+Na]<sup>+</sup>, found 415.0585.

**4-nitro-*N*-((2*S*,3*R*)-5-oxo-2-(*p*-tolyl)tetrahydrofuran-3-yl)benzenesulfonamide (3h):**

White solid (0.077 g; 83%). M.p. 126-128 °C. **FTIR** (KBr, cm<sup>-1</sup>): 3390, 2953, 2843, 1652, 1534, 1454, 1412, 1353, 1169, 1053. **<sup>1</sup>H NMR** (d<sub>6</sub>-DMSO, 200 MHz): δ 8.66 (d, *J* = 8.6 Hz, NH), 8.26 (d, *J* = 8.6 Hz, 2H), 7.83 (d, *J* = 8.6 Hz, 2H), 7.00-6.87 (m, 4H), 5.47 (d, *J* = 8.8 Hz, 1H), 4.03-3.97 (m, 1H), 2.81-2.69 (dd, *J* = 7.0, 17.0 Hz, 2H), 2.19 (s, 3H). **<sup>13</sup>C NMR** (d<sub>6</sub>-DMSO, 100 MHz): δ 171.8 (C=O), 149.8, 145.6, 139.0, 135.6, 129.4, 127.9, 127.9, 127.7, 124.3, 124.0, 84.4, 56.2, 36.2, 21.3.  $[\alpha]_D^{32} = -7.33$  (c 0.1, Me<sub>2</sub>CO) for 88% ee (**HPLC**: Daicel Chiralpak IA (particle size 3 μm), hexane/EtOAc = 50/50, 0.5 ml/min, 254 nm, major 13.04 min and minor 9.77 min). HRMS (ESI) calcd for C<sub>17</sub>H<sub>16</sub>N<sub>2</sub>O<sub>6</sub>NaS 399.0627, m/z [M+Na]<sup>+</sup>, found 399.0638.

***N*-((2*S*,3*R*)-2-(benzo[*d*][1,3]dioxol-5-yl)-5-oxotetrahydrofuran-3-yl)-4-nitrobenzene**

**sulfonamide (3i):** Light yellow solid (0.082 g; 82%). M.p. 194-196 °C. **FTIR** (KBr, cm<sup>-1</sup>): 3416, 2952, 2843, 1646, 1527, 1453, 1452, 1406, 1286, 1109, 1054, 1017. **<sup>1</sup>H NMR** (d<sub>6</sub>-DMSO, 200 MHz): δ 8.84 (bs, NH), 8.23 (d, *J* = 8.8 Hz, 2H), 7.78 (d, *J* = 8.6 Hz, 2H), 6.73 (d, *J* = 8.0 Hz, 3H), 5.93 (s, 2H), 4.96 (d, *J* = 8.2 Hz, 1H), 4.22 (m, 1H), 2.84-2.71 (dd, *J* = 7.8, 16.8 Hz, 2H). **<sup>13</sup>C NMR** (d<sub>6</sub>-DMSO, 100 MHz): δ 173.6 (C=O), 149.9, 148.3, 147.8, 146.8, 130.3, 128.5, 124.9, 122.3, 108.6, 107.8, 101.9, 84.4, 56.8, 36.5.  $[\alpha]_D^{32} = -9.81$  (c 0.1, Me<sub>2</sub>CO) for 85% ee (**HPLC**: Daicel Chiralpak IA (particle size 3 μm), hexane/EtOAc = 50/50, 0.5 ml/min, 254 nm, major 17.69 min and minor 10.12 min). LCMS (ESI) m/z : 405.0 [M-H]<sup>+</sup>, 424.4 [M+NH<sub>4</sub>]<sup>+</sup>.

**4-nitro-*N*-((2*S*, 3*R*)-6-oxo-2-phenyltetrahydro-2*H*-pyran-3-yl)benzenesulfonamide (7a):**

White solid (0.078 g; 84%). M.p. 138-140 °C. **FTIR** (KBr, cm<sup>-1</sup>): 3227, 2926, 2831, 1654, 1526, 1457, 1383, 1349, 1158, 1092, 1041. **<sup>1</sup>H NMR** (CDCl<sub>3</sub>, 200 MHz): δ 8.09 (d, *J* = 8.6 Hz, 2H), 7.64 (d, *J* = 8.6 Hz, 2H), 7.23-7.04 (m, 5H), 5.03 (d, *J* = 7.8 Hz, 2H), 3.74-3.54 (m, 1H), 2.78-2.68 (m, 2H), 2.38-2.29 (m, 1H), 2.03-1.93 (m, 1H). **<sup>1</sup>H NMR** (d<sub>6</sub>-DMSO, 200 MHz): δ 8.48 (s, NH), 8.11 (d, *J* = 8.8 Hz, 2H), 7.64 (d, *J* = 8.6 Hz, 2H), 7.23-7.04 (m, 5H), 5.04 (d, *J* = 9.2 Hz, 1H), 3.78-3.66 (m, 1H), 2.62 (t, *J* = 5.4, 8.8 Hz, 2H), 1.92-1.76 (m, 2H).

**<sup>13</sup>C NMR** (d<sub>6</sub>-DMSO, 100 MHz): δ 170.4 (C=O), 149.8, 147.2, 137.8, 128.7 (2C), 128.3 (2C), 128.1 (2C), 126.8, 125.1(2C), 82.9, 52.8, 30.2, 28.5.  $[\alpha]_D^{32} = -18.20$  (c 0.6, Me<sub>2</sub>CO) for 89% ee (**HPLC**: Daicel Chiralpak IA (particle size 5 μm), hexane/EtOAc = 60/40, 1.0 ml/min, 254 nm, major 9.43 min and minor 10.52 min). HRMS (ESI) calcd for C<sub>17</sub>H<sub>16</sub>N<sub>2</sub>O<sub>6</sub>NaS 399.0627, m/z [M+Na]<sup>+</sup>, found 399.0628.

***N*-((2*S*, 3*R*)-2-(4-fluorophenyl)-6-oxotetrahydro-2*H*-pyran-3-yl)-4-nitrobenzenesulfonamide (7b)**: White solid (0.077 g; 79%). M.p. 102-104 °C. **FTIR** (KBr, cm<sup>-1</sup>): 3413, 2967, 2844, 1646, 1534, 1455, 1412, 1168, 1113, 1016. **<sup>1</sup>H NMR** (d<sub>6</sub>-DMSO, 200 MHz): δ 8.54 (d, *J* = 8.6 Hz, NH), 8.18 (d, *J* = 7.4 Hz, 2H), 7.66 (d, *J* = 7.6 Hz, 2H), 7.38 (t, *J* = 7.6, 5.6 Hz, 2H), 6.92 (t, *J* = 8.6, 8 Hz, 2H), 5.06 (d, *J* = 9.6 Hz, 1H), 3.85-3.68 (m, 1H), 2.63 (t, *J* = 6, 5.6 Hz, 2H), 1.97-1.89 (m, 2H). **<sup>13</sup>C NMR** (d<sub>6</sub>-DMSO, 50 MHz): δ 170.8 (C=O), 162.4 (d, <sup>1</sup>*J*<sub>C,F</sub> = 241.5 Hz), 149.4, 146.9, 135.3, 129.5 (d, <sup>3</sup>*J*<sub>C,F</sub> = 8 Hz), 127.9 (2C), 124.7 (2C), 115.4 (d, <sup>2</sup>*J*<sub>C,F</sub> = 20.5 Hz), 84.2, 52.7, 28.5, 26.6.  $[\alpha]_D^{32} = -34.82$  (c 0.5, Me<sub>2</sub>CO) for 92% ee (**HPLC**: Daicel Chiralpak IC (particle size 5 μm), hexane/EtOAc = 60/40, 1.0 ml/min, 254 nm, major 13.66 min and minor 11.95 min). HRMS (ESI) calcd for C<sub>17</sub>H<sub>15</sub>FN<sub>2</sub>O<sub>6</sub>NaS 417.0533, m/z [M+Na]<sup>+</sup>, found 417.0546.

***N*-((2*S*, 3*R*)-2-(4-chlorophenyl)-6-oxotetrahydro-2*H*-pyran-3-yl)-4-nitrobenzenesulfonamide (7c)**: White solid (0.078 g; 77%). M.p. 131-133 °C. **FTIR** (KBr, cm<sup>-1</sup>): 3388, 2950, 2838, 1654, 1534, 1451, 1412, 1169, 1112, 1020. **<sup>1</sup>H NMR** (d<sub>6</sub>-DMSO, 200 MHz): δ 8.62 (d, *J* = 8.8 Hz, NH), 8.21 (d, *J* = 8.8 Hz, 2H), 7.67 (d, *J* = 8.8 Hz, 2H), 7.25-7.13 (m, 4H), 5.09 (d, *J* = 9.8 Hz, 1H), 3.87-3.65 (m, 1H), 2.71 (t, *J* = 7.2, 6.6 Hz, 2H), 2.03-1.93 (m, 2H). **<sup>13</sup>C NMR** (d<sub>6</sub>-DMSO, 100 MHz): δ 170.4 (C=O), 149.5, 147.1, 136.9, 134.1, 129.8, 128.5, 128.1, 124.8, 81.7, 55.4, 28.7, 27.7.  $[\alpha]_D^{32} = -22.73$  (c 0.5, Me<sub>2</sub>CO) for 84% ee (**HPLC**: Daicel Chiralpak IA (particle size 3 μm), hexane/EtOAc = 50/50, 0.5 ml/min, 254 nm, major 14.05 min and minor 19.95 min). HRMS (ESI) calcd for C<sub>17</sub>H<sub>15</sub>ClN<sub>2</sub>O<sub>6</sub>NS 410.0339, m/z [M]<sup>+</sup>, found 410.0317.

***N*-((2*S*, 3*R*)-2-(2-bromophenyl)-6-oxotetrahydro-2*H*-pyran-3-yl)-4-nitrobenzenesulfonamide (7d)**: White solid (0.082 g; 73%). M.p. 162-164 °C. **FTIR** (KBr, cm<sup>-1</sup>): 3408, 2950, 2842, 1647, 1531, 1452, 1413, 1162, 1019. **<sup>1</sup>H NMR** (d<sub>6</sub>-DMSO, 400 MHz): δ 8.61 (d, *J* = 8.8 Hz, NH), 8.22 (d, *J* = 8.8 Hz, 2H), 7.79 (d, *J* = 8.8 Hz, 2H), 7.46-7.37 (m, 2H), 7.29-7.26 (m, 1H), 7.17-7.13 (m, 1H), 5.43 (d, *J* = 9.2 Hz, 1H), 4.00-3.92 (m, 1H), 2.66 (t, *J* = 6.8, 7.2

Hz, 2H), 1.97-1.89 (m, 1H), 1.87-1.78 (m, 1H).  $^{13}\text{C}$  NMR ( $d_6$ -DMSO, 100 MHz):  $\delta$  169.8 (C=O), 149.8, 147.0, 136.4, 133.3, 130.9, 130.6, 128.3, 128.2, 124.9, 123.3, 81.9, 51.5, 28.3, 26.0.  $[\alpha]_D^{32} = -21.80$  (c 0.5,  $\text{Me}_2\text{CO}$ ) for 88% ee (**HPLC**: Daicel Chiralpak IA (particle size 3  $\mu\text{m}$ ), hexane/EtOAc = 50/50, 0.5 ml/min, 254 nm, major 11.29 min and minor 12.00 min). LCMS (ESI)  $m/z$ : 454.9  $[\text{M}+\text{H}]^+$ , 472.4  $[\text{M}+\text{NH}_4]^+$ .

**4-nitro-*N*-((*R*)-1-((*S*)-3-oxo-1, 3-dihydroisobenzofuran-1-yl)propyl)benzenesulfonamide (10)**: Light Yellow solid (0.070 g; 75%). M.p. 228-230 °C. **FTIR** (KBr,  $\text{cm}^{-1}$ ): 3385, 2951, 2835, 1654, 1455, 1420, 1113, 1023.  $^1\text{H}$  NMR ( $\text{CDCl}_3$ , 400 MHz):  $\delta$  8.32 (d,  $J = 8.4$  Hz, 2H), 8.04 (d,  $J = 8.4$  Hz, 2H), 8.00-7.97 (m, 1H), 7.69-7.65 (m, 1H), 7.59-7.46 (m, 2H), 5.40 (d,  $J = 4.8$  Hz, 1H), 4.64-4.61 (m, 1H), 3.89-3.84 (m, 1H), 1.69-1.46 (m, 2H), 0.94 (t,  $J = 7.2, 7.6$  Hz, 3H).  $^{13}\text{C}$  NMR ( $\text{CDCl}_3$ , 100 MHz):  $\delta$  170.7 (C=O), 163.7, 149.9, 146.9, 136.2, 134.5, 130.4, 129.7, 128.8, 128.4 (2C), 124.3 (2C), 83.8, 52.6, 29.6, 25.7.  $[\alpha]_D^{32} = -22.65$  (c 0.2,  $\text{Me}_2\text{CO}$ ) for 79% ee (**HPLC**: Daicel Chiralpak IA (particle size 5  $\mu\text{m}$ ), hexane/EtOAc = 65/35, 1.0 ml/min, 254 nm, major 15.02 min and minor 11.17 min). HRMS (ESI) calcd for  $\text{C}_{17}\text{H}_{16}\text{N}_2\text{O}_6\text{NaS}$  399.0627,  $m/z$   $[\text{M}+\text{Na}]^+$ , found 399.0624.

**(3*R*,5*R*,6*S*)-tert-butyl 3-methyl-5-(4-nitrophenylsulfonamido)-2-oxo-6-phenyltetrahydro-2*H*-pyran-3-carboxylate (13a)**: White solid (0.103 g; 85%). M.p. 160-162 °C. **FTIR** (KBr,  $\text{cm}^{-1}$ ): 3434, 2952, 2842, 1647, 1532, 1452, 1406, 1163, 1113, 1052, 1017.  $^1\text{H}$  NMR ( $\text{CDCl}_3$ , 200 MHz):  $\delta$  7.99 (d,  $J = 8.2$  Hz, 2H), 7.46 (d,  $J = 8.0$  Hz, 2H), 7.08 (s, 5H), 4.91-4.86 (m, 1H & NH), 3.91-3.88 (m, 1H), 2.71 (d,  $J = 12.8$  Hz, 1H), 1.97 (t,  $J = 13.0, 13.8$  Hz, 1H), 1.58 (s, 9H), 1.54 (s, 3H).  $^{13}\text{C}$  NMR ( $\text{CDCl}_3$ , 100 MHz):  $\delta$  170.6 (C=O), 169.1 (C=O), 149.9, 145.2, 136.2, 129.6, 128.9, 127.9, 127.4, 124.3, 84.9, 84.2, 52.3, 51.7, 40.5, 28.0, 23.1.  $[\alpha]_D^{32} = -61.32$  (c 0.5,  $\text{Me}_2\text{CO}$ ) for 90% ee (**HPLC**: Daicel Chiralpak IA (particle size 3  $\mu\text{m}$ ), hexane/EtOAc = 50/50, 0.5 ml/min, 254 nm, major 7.74 min and minor 8.53 min). HRMS (ESI) calcd for  $\text{C}_{23}\text{H}_{26}\text{N}_2\text{O}_8\text{NaS}$  513.1308,  $m/z$   $[\text{M}+\text{Na}]^+$ , found 513.1320.

**(3*R*,5*R*,6*S*)-tert-butyl 3-methyl-5-(4-nitrophenylsulfonamido)-2-oxo-6-(*p*-tolyl)tetrahydro-2*H*-pyran-3-carboxylate (13b)**: White solid (0.109 g; 87%). M.p. 132-134 °C. **FTIR** (KBr,  $\text{cm}^{-1}$ ): 3392, 2948, 2836, 1653, 1453, 1413, 1114, 1032.  $^1\text{H}$  NMR ( $\text{CDCl}_3$ , 200 MHz):  $\delta$  8.04 (d,  $J = 8.8$  Hz, 2H), 7.49 (d,  $J = 9.0$  Hz, 2H), 6.99-6.88 (m, 4H), 4.85 (d,  $J = 10.4$  Hz, 1H), 4.69 (d,  $J = 7.2$  Hz, 1H), 3.87 (m, 1H), 2.81-2.72 (dd,  $J = 4.8, 14.4$  Hz, 1H), 2.28 (s, 3H), 1.974 (t,  $J = 13, 14.4$ , 1H), 1.59 (s, 9H), 1.56 (s, 3H).  $^{13}\text{C}$  NMR ( $d_6$ -DMSO, 100 MHz):  $\delta$

171.2 (C=O), 161.1 (C=O), 149.8, 146.9, 138.8, 134.6, 129.3, 127.9, 127.8, 127.6, 125.1, 124.9, 83.8, 83.4, 51.0, 51.6, 28.1, 22.9, 21.1.  $[\alpha]_D^{32} = -34.54$  (c 0.3, Me<sub>2</sub>CO) for 96% ee (**HPLC**: Daicel Chiralpak IA (particle size 3 μm), hexane/EtOAc = 50/50, 0.5 ml/min, 254 nm, major 8.59 min and minor 10.23 min). HRMS (ESI) calcd for C<sub>24</sub>H<sub>28</sub>N<sub>2</sub>O<sub>8</sub>NaS 527.1464, m/z [M+Na]<sup>+</sup>, found 527.1472.

**(3R,5R,6S)-tert-butyl 6-(4-fluorophenyl)-3-methyl-5-(4-nitrophenylsulfonamido)-2-oxo tetrahydro-2H-pyran-3-carboxylate (13c)**: White solid (0.102 g; 81%). M.p. 146-148 °C. **FTIR** (KBr, cm<sup>-1</sup>): 3435, 2953, 2844, 1641, 1532, 1455, 1349, 1162, 1119, 1053, 1016. **<sup>1</sup>H NMR** (CDCl<sub>3</sub>, 200 MHz): δ 8.09 (d, *J* = 8.6 Hz, 2H), 7.53 (d, *J* = 8.8 Hz, 2H), 7.12-7.05 (m, 2H), 6.78 (t, *J* = 8.4, 8.6 Hz, 2H), 5.11 (d, *J* = 8.6 Hz, 1H), 4.91 (d, *J* = 10.4, 1H), 3.89-3.85 (m, 1H), 2.65-2.56 (dd, *J* = 3.4, 13.6, 1H), 1.96 (t, *J* = 12.8, 13.0 Hz, 1H), 1.58 (s, 9H), 1.51 (s, 3H). **<sup>13</sup>C NMR** (CDCl<sub>3</sub>, 100 MHz): δ 170.4 (C=O), 168.9 (C=O), 163.4 (d, <sup>1</sup>*J*<sub>C,F</sub> = 266.4 Hz), 150.0, 145.6, 132.3, 129.3 (d, <sup>3</sup>*J*<sub>C,F</sub> = 8.4 Hz), 128.0 (2C), 124.3 (2C), 115.9 (d, <sup>2</sup>*J*<sub>C,F</sub> = 21.7 Hz), 84.3, 52.5, 51.8, 40.4, 28.1, 23.0.  $[\alpha]_D^{32} = -66.32$  (c 0.1, Me<sub>2</sub>CO) for 98% ee (**HPLC**: Daicel Chiralpak IA (particle size 3 μm), hexane/EtOAc = 50/50, 0.5 ml/min, 254 nm, major 7.56 min and minor 8.28 min). LCMS (ESI) m/z : 526.0 [M+NH<sub>4</sub>]<sup>+</sup>.

**(3R,5R,6S)-tert-butyl 6-(2-bromophenyl)-3-methyl-5-(4-nitrophenylsulfonamido)-2-oxo tetrahydro-2H-pyran-3-carboxylate (13d)**: White solid (0.111 g; 79%). M.p. 126-128 °C. **FTIR** (KBr, cm<sup>-1</sup>): 3426, 2950, 2841, 1651, 1531, 1454, 1350, 1163, 1111, 1018. **<sup>1</sup>H NMR** (CDCl<sub>3</sub>, 200 MHz): δ 7.98 (d, *J* = 8.0 Hz, 2H), 7.53 (d, *J* = 8.0 Hz, 2H), 7.29-7.26 (m, 1H), 7.21 (d, *J* = 8.0 Hz, 1H), 7.11 (t, *J* = 6.8, 7.6 Hz, 1H), 7.00 (t, *J* = 7.2, 7.6 Hz, 1H), 5.52 (d, *J* = 8.0 Hz, 1H), 5.09 (d, *J* = 4.4 Hz, 1H), 3.98 (bs, 1H), 2.70 (d, *J* = 11.2 Hz, 1H, 1H), 2.09 (m, 1H), 1.59 (s, 9H), 1.57 (s, 3H). **<sup>13</sup>C NMR** (CDCl<sub>3</sub>, 100 MHz): δ 170.1 (C=O), 168.3 (C=O), 149.8, 145.1, 136.2, 132.5, 130.6, 128.8, 128.3, 127.5, 124.1, 123.1, 84.1, 81.7, 53.4, 51.6, 41.1, 27.9, 22.9.  $[\alpha]_D^{32} = -94.19$  (c 0.7, Me<sub>2</sub>CO) for 94% ee (**HPLC**: Daicel Chiralpak IA (particle size 3 μm), hexane/EtOAc = 50/50, 0.5 ml/min, 254 nm, major 7.58 min and minor 9.17 min). HRMS (ESI) calcd for C<sub>23</sub>H<sub>25</sub>BrN<sub>2</sub>O<sub>8</sub>NaS 591.0413, m/z [M+Na]<sup>+</sup>, found 591.0421.

**G) Spectral Data of alkenoic acid esters (1a-i, 8, 5a-d, 11a-d and 1a'):**

**(*E*)-tert-butyl 4-phenylbut-3-enoate (1a):** Light yellow oil.  $^1\text{H}$  NMR ( $\text{CDCl}_3$ , 200 MHz):  $\delta$  7.34-7.16 (m, 5H), 6.37 (d,  $J = 15.6$  Hz, 1H), 6.25-6.10 (m, 1H), 3.05 (d,  $J = 6.8$  Hz, 2H), 1.37 (s, 9H).

**(*E*)-tert-butyl 4-(4-chlorophenyl)but-3-enoate (1c):** Light yellow oil.  $^1\text{H}$  NMR ( $\text{CDCl}_3$ , 200 MHz):  $\delta$  7.41-7.23 (m, 4H), 6.42 (d,  $J = 16.4$  Hz, 1H), 6.33-6.18 (m, 1H), 3.15 (d,  $J = 6.6$  Hz, 2H), 1.46 (s, 9H).

**(*E*)-tert-butyl 4-(4-fluorophenyl)but-3-enoate (1b):** Light yellow oil.  $^1\text{H}$  NMR ( $\text{CDCl}_3$ , 200 MHz):  $\delta$  7.38-7.25 (m, 2H), 7.12-7.09 (m, 2H), 6.42 (d,  $J = 15.8$  Hz, 1H), 6.26-6.12 (m, 1H), 3.14 (d,  $J = 7$  Hz, 2H), 1.47 (s, 9H).

**(*E*)-tert-butyl 4-(2-chlorophenyl)but-3-enoate (1d):** Light yellow oil.  $^1\text{H}$  NMR ( $\text{CDCl}_3$ , 200 MHz):  $\delta$  7.39-7.15 (m, 4H), 6.85 (d,  $J = 16$  Hz, 1H), 6.40-6.21 (m, 1H), 3.21 (d,  $J = 7$  Hz, 2H), 1.48 (s, 9H).

**(*E*)-tert-butyl 4-(2-bromophenyl)but-3-enoate (1e):** Light yellow oil.  $^1\text{H}$  NMR ( $\text{CDCl}_3$ , 400 MHz):  $\delta$  7.40-7.23 (m, 3H), 7.15-6.97 (m, 1H), 6.83 (d,  $J = 15.6$  Hz, 1H), 6.34-6.24 (m, 1H), 3.24-3.22 (dd,  $J = 1.6, 7.2$  Hz, 2H), 1.49 (s, 9H).

**(*E*)-tert-butyl 4-(3-bromophenyl)but-3-enoate (1f):** Light yellow oil.  $^1\text{H}$  NMR ( $\text{CDCl}_3$ , 200 MHz):  $\delta$  7.39-7.12 (m, 4H), 6.44-6.21 (m, 2H), 3.15 (d,  $J = 5.6$  Hz, 2H), 1.47 (s, 9H).

**(*E*)-tert-butyl 4-(4-methoxyphenyl)but-3-enoate (1g):** Light yellow oil.  $^1\text{H}$  NMR ( $\text{CDCl}_3$ , 200 MHz):  $\delta$  7.30 (d,  $J = 8.6$  Hz, 2H), 6.84 (d,  $J = 8.6$  Hz, 2H), 6.41 (d,  $J = 15.8$  Hz, 1H), 3.80 (s, 3H), 3.12 (d,  $J = 6.8$  Hz, 2H), 1.46 (s, 9H).

**(*E*)-tert-butyl 4-(*p*-tolyl)but-3-enoate (1h):** Light yellow oil.  $^1\text{H}$  NMR ( $\text{CDCl}_3$ , 200 MHz):  $\delta$  7.30-7.10 (m, 4H), 6.45 (d,  $J = 15.8$  Hz, 1H), 6.32-6.17 (m, 1H), 3.16 (d,  $J = 6.8$  Hz, 2H), 2.34 (s, 3H), 1.48 (s, 9H).

**(E)-tert-butyl 4-(benzo[d][1,3]dioxol-5-yl)but-3-enoate (1i):** Light yellow oil.  $^1\text{H}$  NMR ( $\text{CDCl}_3$ , 200 MHz):  $\delta$  6.93 (s, 1H), 6.88-6.72 (m, 2H), 6.38 (d,  $J$  = 16.0 Hz, 1H), 6.18-6.07 (m, 1H), 5.92 (s, 2H), 3.13 (d,  $J$  = 7.0 Hz, 2H), 1.47 (s, 9H).

**tert-butyl 2-(but-1-en-1-yl)benzoate (8):**  $E:Z$  = 82 : 18. Light yellow oil.  $^1\text{H}$  NMR ( $\text{CDCl}_3$ , 200 MHz):  $\delta$  7.84 (d,  $J$  = 7.4 Hz, 0.22H), 7.75 (d,  $J$  = 7.8 Hz, 1H), 7.52-7.19 (m, 3.66H), 7.05 (d,  $J$  = 15.6 Hz, 1H), 6.77 (d,  $J$  = 11.6 Hz, 0.22H), 6.21-6.07 (m, 1H), 5.75-5.39 (m, 0.22H), 2.30-2.09 (m, 2.44H), 1.59 (s, 9H), 1.14 (t,  $J$  = 7.4, 7.4 Hz, 3H), 1.03 (t,  $J$  = 7.4, 7.4 Hz, 0.66H).

**(E)-tert-butyl 5-phenylpent-4-enoate (5a):** Light yellow oil.  $^1\text{H}$  NMR ( $\text{CDCl}_3$ , 200 MHz):  $\delta$  7.35-7.16 (m, 5H), 6.42 (d,  $J$  = 15.8 Hz, 1H), 6.27-6.16 (m, 1H), 2.51-2.34 (m, 4H), 1.45 (s, 9H).

**(E)-tert-butyl 5-(4-fluorophenyl)pent-4-enoate (5b):** Light yellow oil.  $^1\text{H}$  NMR ( $\text{CDCl}_3$ , 200 MHz):  $\delta$  7.33-7.24 (m, 2H), 7.08-6.92 (m, 2H), 6.38 (d,  $J$  = 15.6 Hz, 1H), 6.17-6.03 (m, 1H), 2.50-2.33 (m, 4H), 1.44 (s, 9H).

**(E)-tert-butyl 5-(4-chlorophenyl)pent-4-enoate (5c):** Light yellow oil.  $^1\text{H}$  NMR ( $\text{CDCl}_3$ , 200 MHz):  $\delta$  7.39-7.25 (m, 4H), 6.38 (d,  $J$  = 15.8 Hz, 1H), 6.25-6.14 (m, 1H), 2.55-2.35 (m, 4H), 1.45 (s, 9H).

**(E)-tert-butyl 5-(2-bromophenyl)pent-4-enoate (5d):** Light yellow oil.  $^1\text{H}$  NMR ( $\text{CDCl}_3$ , 200 MHz):  $\delta$  7.55-7.46 (m, 2H), 7.28-7.21 (m, 1H), 7.11-7.03 (m, 1H), 6.76 (d,  $J$  = 15.6 Hz, 1H), 6.24-6.09 (m, 1H), 2.56-2.43 (m, 4H), 1.47 (s, 9H).

**di-tert-butyl 2-cinnamyl-2-methylmalonate (11a):** Light yellow oil.  $^1\text{H}$  NMR ( $\text{CDCl}_3$ , 200 MHz):  $\delta$  7.32-7.23 (m, 5H), 6.45 (d,  $J$  = 15.8 Hz, 1H), 6.19-6.05 (m, 1H), 2.69 (d,  $J$  = 7.4 Hz, 2H), 1.46 (s, 9H), 1.37 (s, 3H).

**(E)-di-tert-butyl 2-(3-(2-bromophenyl)allyl)-2-methylmalonate (11d):** Light yellow oil.  $^1\text{H}$  NMR ( $\text{CDCl}_3$ , 200 MHz):  $\delta$  7.50 (t,  $J$  = 7.8, 11 Hz, 2H), 7.24-7.21 (m, 1H), 7.11-7.04 (m, 1H), 6.79 (d,  $J$  = 15.6 Hz, 1H), 6.16-6.00 (m, 1H), 2.74 (d,  $J$  = 7.6 Hz, 2H), 1.46 (s, 9H), 1.38 (s, 3H).

**(E)-di-tert-butyl 2-methyl-2-(3-(p-tolyl)allyl)malonate (11c):** Light yellow oil.  $^1\text{H}$  NMR ( $\text{CDCl}_3$ , 200 MHz):  $\delta$  7.30-7.15 (m, 4H), 6.44 (d,  $J = 15.8$  Hz, 1H), 6.16-6.01 (m, 1H), 2.70 (d,  $J = 7.4$  Hz, 2H), 2.36 (s, 3H), 1.49 (s, 9H), 1.39 (s, 3H).

**(E)-di-tert-butyl 2-(3-(4-fluorophenyl)allyl)-2-methylmalonate (11b):** Light yellow oil.  $^1\text{H}$  NMR ( $\text{CDCl}_3$ , 200 MHz):  $\delta$  7.35-7.28 (m, 2H), 7.01 (t,  $J = 8.8, 8.6$  Hz, 2H), 6.43 (d,  $J = 15.8$  Hz, 1H), 6.14-5.99 (m, 1H), 2.70 (d,  $J = 7.0$  Hz, 2H), 1.49 (s, 9H), 1.39 (s, 3H).

**(E)-methyl 4-phenylbut-3-enoate (1a'):** Light yellow oil.  $^1\text{H}$  NMR ( $\text{CDCl}_3$ , 200 MHz):  $\delta$  7.49-7.24 (m, 5H), 6.51 (d,  $J = 15.8$  Hz, 1H), 6.38-6.23 (m, 1H), 3.73 (s, 3H), 3.29 (d,  $J = 6.8$  Hz, 2H).

#### H) Synthesis and Spectral Data of compounds 14-16 and 2a':

**(4R, 5S)-4-amino-5-(4-methoxyphenyl)dihydrofuran-2(3H)-one (14):** To a well stirred solution of **3g** (0.16 g, 0.408 mmol) taken in 3 mL  $\text{CH}_3\text{CN}:\text{DMSO}$  (49:1) at rt, 1.1 equiv 4-methoxythiophenol (0.055 mL, 0.449 mmol) and 1.1 equiv of  $\text{K}_2\text{CO}_3$  (0.62 g, 0.449 mmol) were added and the reaction mixture was allowed to stir for 4 h. Upon completion of the reaction the reaction mixture was filtered using MeOH as an eluent. Solvent was evaporated under reduced pressure and the crude yellow oil was immediately used in the next step.

**tert-butyl ((2S, 3R)-2-(4-methoxyphenyl)-5-oxotetrahydrofuran-3-yl)carbamate (15):** The crude yellow oil was taken in 10 mL dry THF. 3.3 equiv of  $\text{BOC}_2\text{O}$  (0.309 mL, 1.346 mmol) was added and the reaction mixture was allowed to stir for overnight. Solvent was evaporated under reduced pressure and 20 mL of EtOAc was added. The organic layer washed with  $\text{H}_2\text{O}$  (2 X 15 mL) and the dried over  $\text{Na}_2\text{SO}_4$ . Concentration and column chromatography (20% EtOAc in hexane) gave titled compound **15** as white solid (0.102 g, yield 82% in overall two steps). M.p. 112-114 °C.  $^1\text{H}$  NMR ( $\text{CDCl}_3$ , 200 MHz):  $\delta$  7.35-7.27 (m, 2H), 6.95-6.90 (m, 2H), 5.41 (bs, NH), 4.91 (d,  $J = 5.6$  Hz, 1H), 4.27 (m, 1H), 3.83 (s, 3H), 3.03-2.86 (dd,  $J = 7.8, 25.6$  Hz, 1H), 2.55-2.44 (dd,  $J = 4.8, 17.8$  Hz, 1H), 1.45 (s, 9H).  $^{13}\text{C}$  NMR ( $\text{CDCl}_3$ , 100 MHz):  $\delta$  173.5 (C=O), 159.9, 128.9 (2C), 126.8 (2C), 114.4, 86.1, 78.5, 56.6, 55.5, 34.4, 28.4.

**(S)-3-((tert-butoxycarbonyl)amino)-4-(4-methoxyphenyl)butanoic acid (16):** Compound **15** (0.1 g, 0.16 mmol) was taken in 4 mL MeOH. After addition of 10% Pd-C (0.1 equiv), the reaction mixture was purged with H<sub>2</sub> and the reaction mixture was stirred under the H<sub>2</sub> atmosphere for 1.5 h. On completion, the mixture was passed through a celite pad, washed with MeOH (3 x 20 mL), on solvent evaporation pure compound **16** was obtained as a colourless solid (0.097 g, yield 96%). M.p. 102-104 °C. <sup>1</sup>H NMR (CD<sub>3</sub>OD, 200 MHz): δ 7.12 (d, *J* = 8.2 Hz, 2H), 6.83 (d, *J* = 8 Hz, 2H), 4.11-4.04 (m, 1H), 3.76 (s, 3H), 2.71(m, 2H), 2.48 (m, 2H), 1.37 (s, 9H). <sup>13</sup>C NMR (CD<sub>3</sub>OD, 50 MHz): δ 173.9 (C=O), 158.6, 156.6, 130.4, 130.2, 113.6, 78.8, 54.4, 41.6, 39.7, 27.8.<sup>6</sup> [ $\alpha$ ]<sub>D</sub><sup>26</sup> = -17.4 (*c* 1.1, EtOH), [Lit<sup>7</sup>. [ $\alpha$ ]<sub>D</sub><sup>20</sup> = -18.7 (*c* 1, EtOH)].

**methyl 2-((2R,3R)-1-((4-nitrophenyl)sulfonyl)-3-phenylaziridin-2-yl)acetate (2a'):** White solid (0.054 g, 61% yield). M.p. 138-140 °C. <sup>1</sup>H NMR (CDCl<sub>3</sub>, 200 MHz): δ 8.26 (d, *J* = 8.6 Hz, 2H), 8.07 (d, *J* = 8.8 Hz, 2H), 7.22-7.02 (m, 5H), 4.09 (d, *J* = 3.8 Hz, 1H), 3.71 (s, 3H), 3.22-3.03 (m, 3H). <sup>13</sup>C NMR (CDCl<sub>3</sub>, 100 MHz): δ 171.9 (C=O), 151.0, 147.1, 141.3, 135.5, 128.6, 128.4, 127.6, 126.3, 54.7, 52.2, 50.9, 38.3. [ $\alpha$ ]<sub>D</sub><sup>32</sup> = -12.11 (*c* 0.18, Me<sub>2</sub>CO) for 72% ee (**HPLC**: Daicel Chiralpak IA (particle size 3µm), hexane/<sup>i</sup>PrOH = 85/15, 1.0 ml/min, 254 nm, major 13.56 min and minor 9.58 min).

## I) References:

1. G. Bartoli, M. Bosco, A. Carlone, R. Dalpozzo, E. Marcantoni, P. Melchiorre, L. Sambri, *Synthesis*, 2007, 3489.
2. R. Sanz, J. M. Ignacio, M. A. Rodriguez, F. J. Fananas, J. Barluenga, *Chem. Eur. J.*, 2007, **13**, 4998.
3. D. Ryan, P. McMorn, D. Bethell, G. Hutchings, *Org. Biomol. Chem.*, 2004, **2**, 3566.
4. A. Cornejo, J. M. Fraile, J. I. Garcia, M. J. Gil, V. Martinez-Merino, J. A. Mayoral, E. Pires, I. Villalba, *Synlett.*, 2005, **15**, 2321.
5. S. Hajra, B. Maji and D. Mal, *Adv. Synth. Catal.*, 2009, **351**, 859; Corrigendum: S. Hajra, B. Maji and D. Mal, *Adv. Synth. Catal.*, 2010, **352**, 3112; DOI: 10.1002/adsc.201090036.
6. L. M. Dedkova, N. E. Fahmi, R. Paul, M. del Rosario, L. Zhang, S. Chen, G. Feder, S. M. Hecht, *Biochemistry*, 2012, **51**, 401.
7. L. Lankiewicz, D. Glanz, Z. Grzonka, J. Slaninova, T. Barth, F. Fahrenholz, *Bulletin of the Polish Academy of Sciences, Chemistry*, 1989, **37**, 45.

**J) NMR Spectra:**

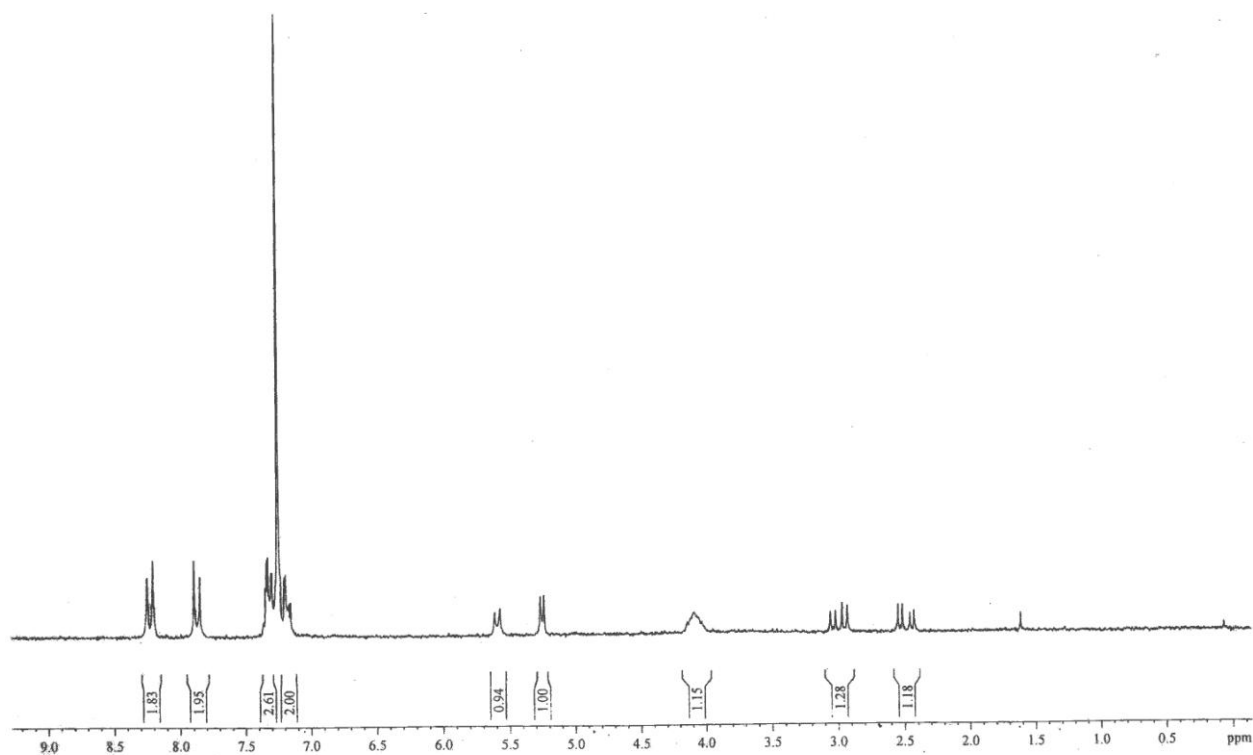

<sup>1</sup>H NMR of compound **3a** (200 MHz, CDCl<sub>3</sub>)

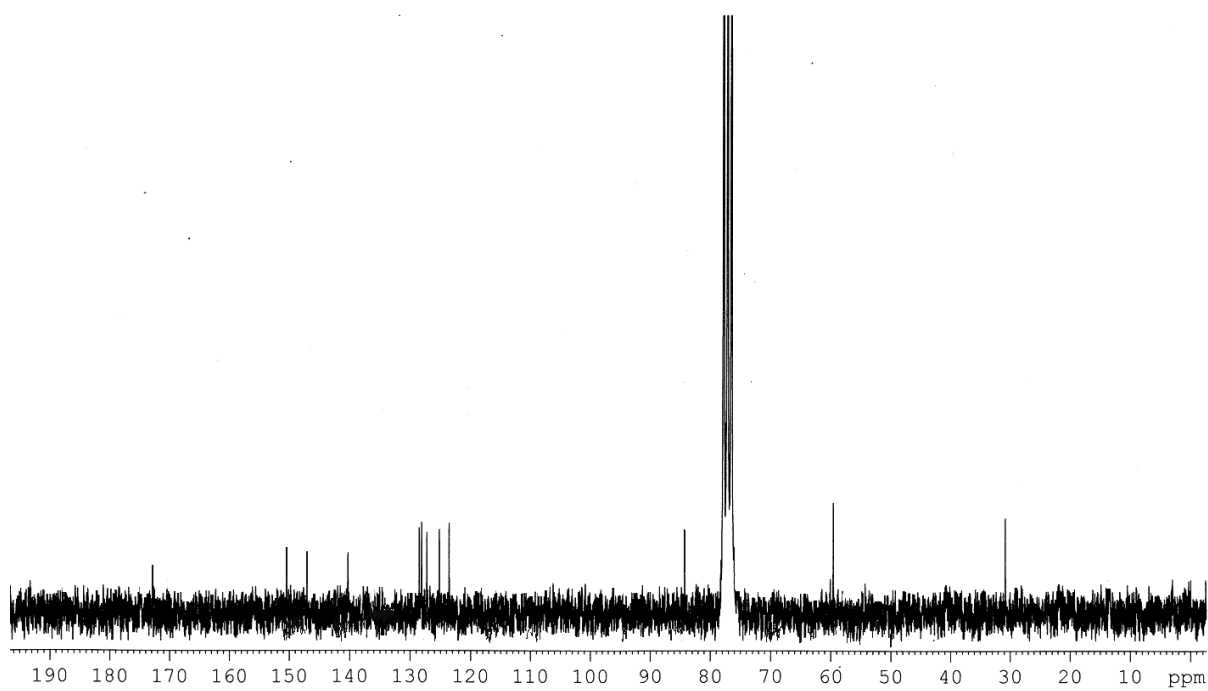

<sup>13</sup>C NMR of compound **3a** (50 MHz, CDCl<sub>3</sub>)

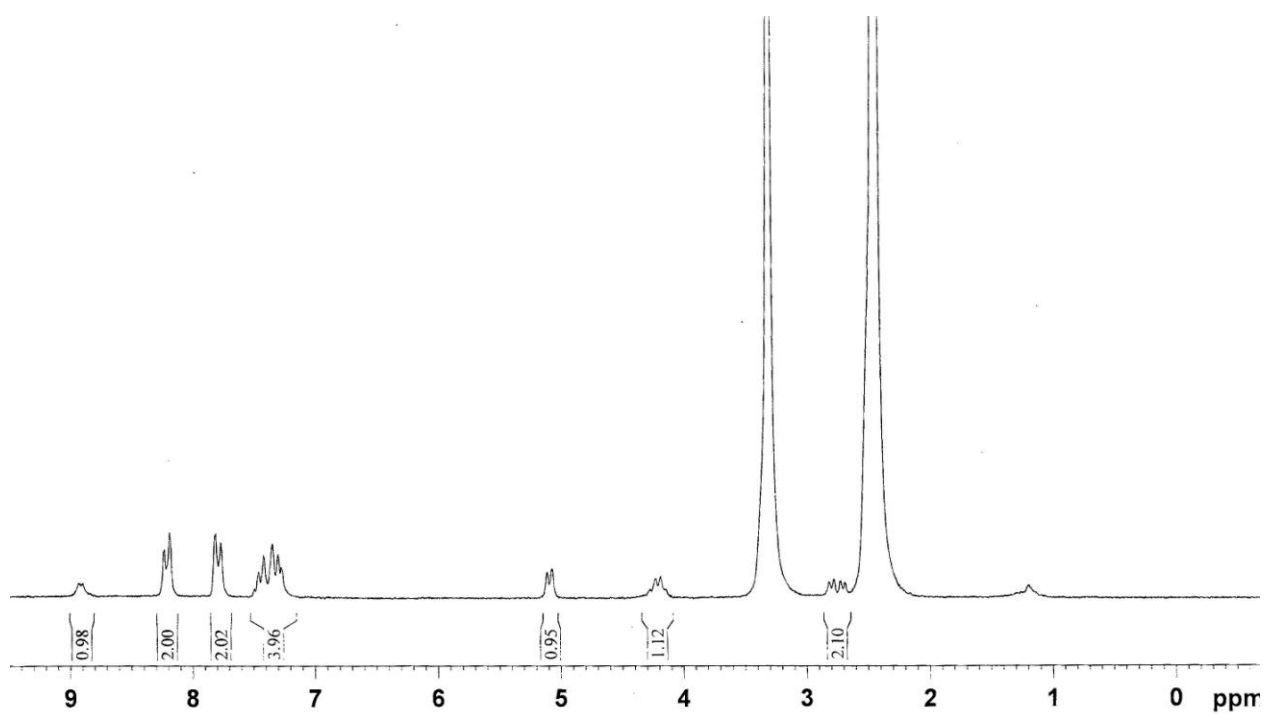

$^1\text{H}$  NMR of compound **3c** (200 MHz,  $\text{d}_6\text{-DMSO}$ )

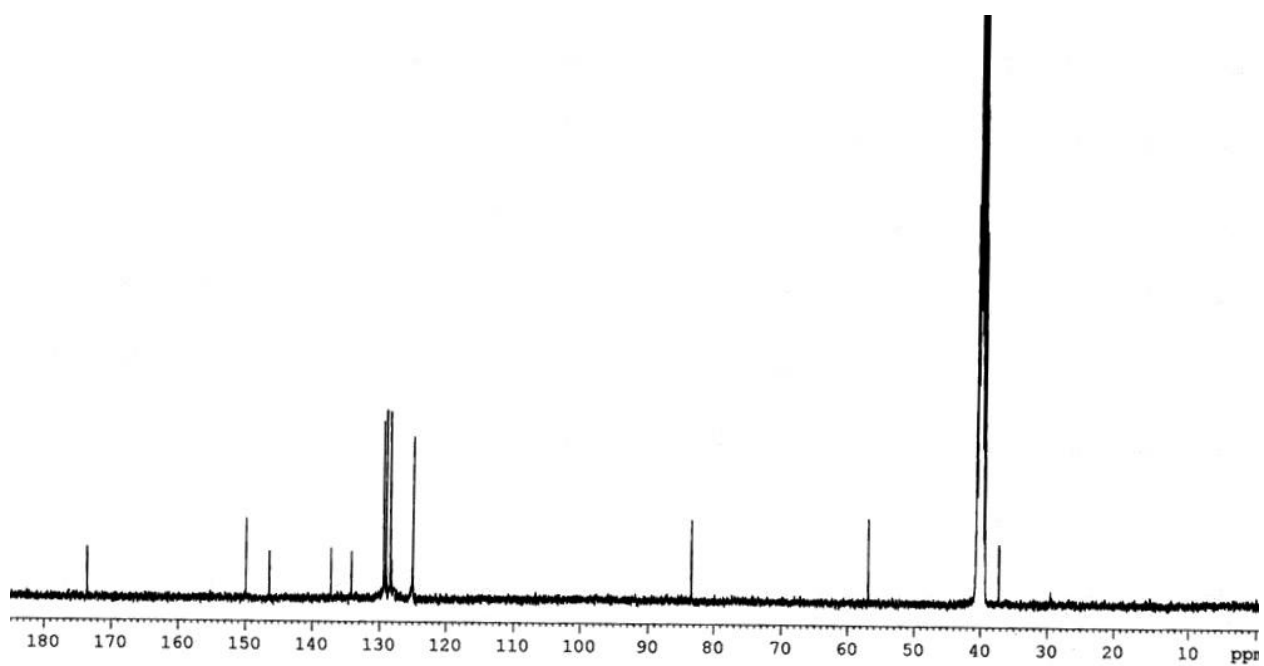

$^{13}\text{C}$  NMR of compound **3c** (100 MHz,  $\text{d}_6\text{-DMSO}$ )

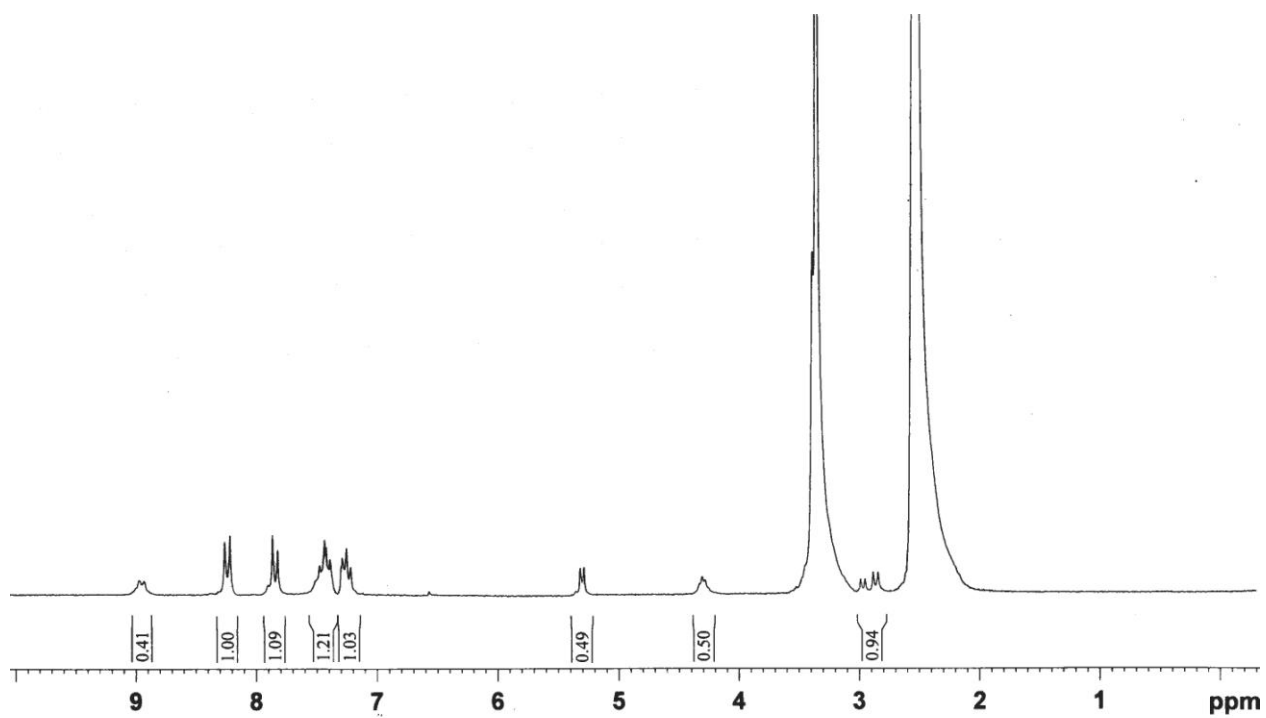

$^1\text{H}$  NMR of compound **3b** (200 MHz,  $\text{CDCl}_3$ )

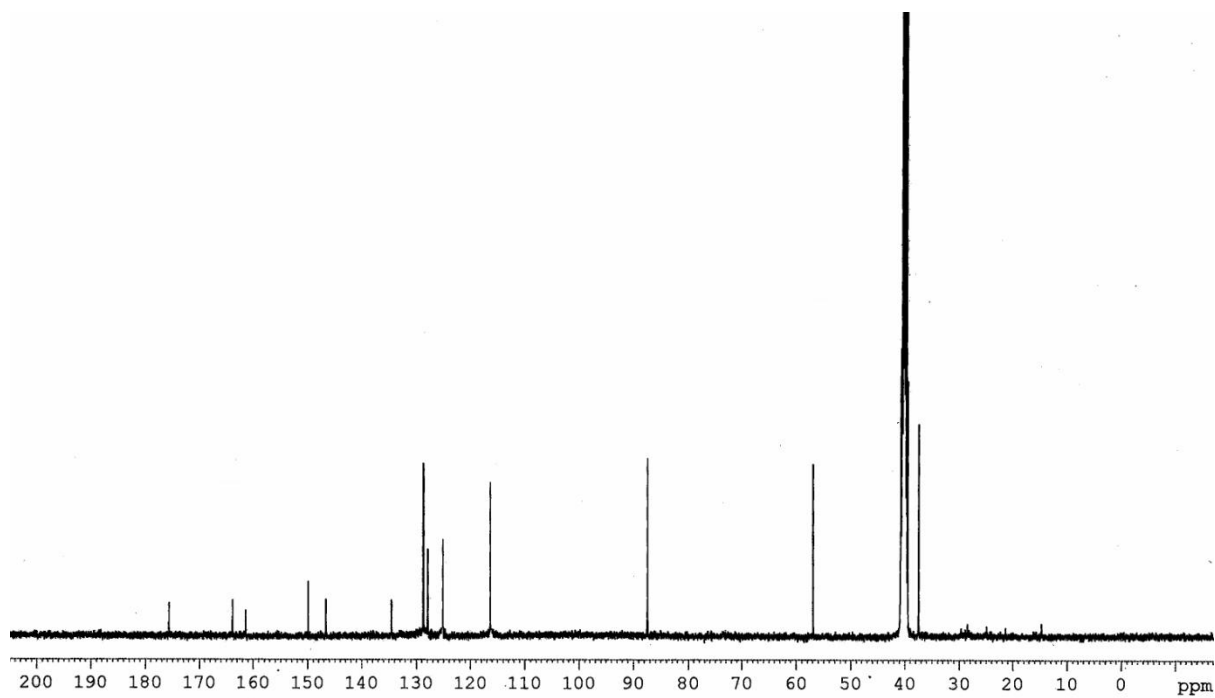

$^{13}\text{C}$  NMR of compound **3b** (100 MHz,  $\text{d}_6\text{-DMSO}$ )

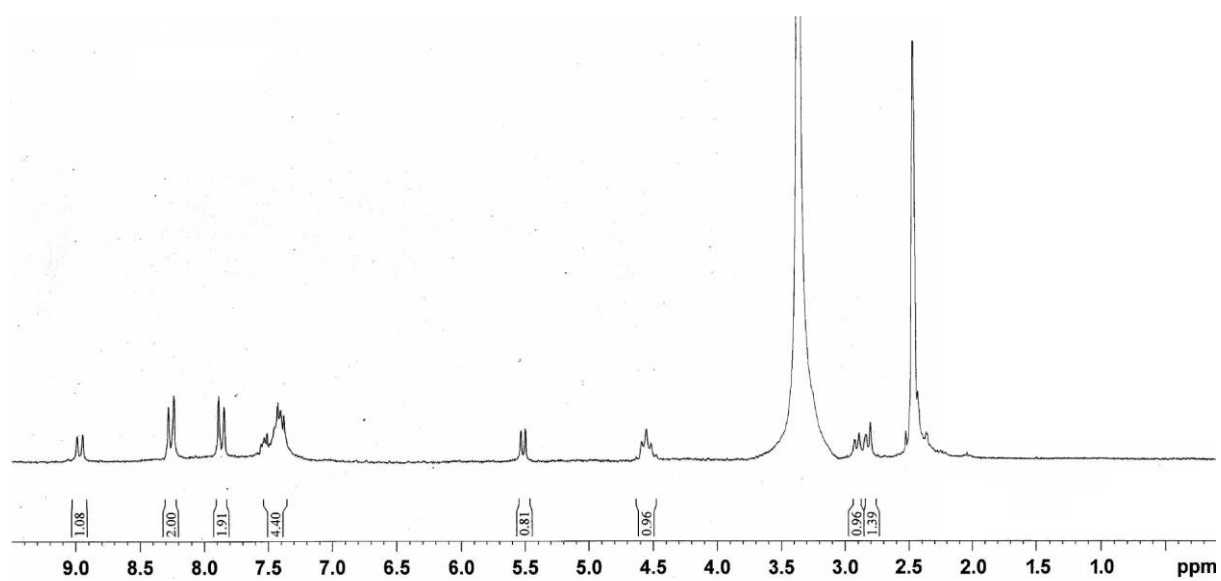

$^1\text{H}$  NMR of compound **3d** (200 MHz,  $\text{d}_6$ -DMSO)

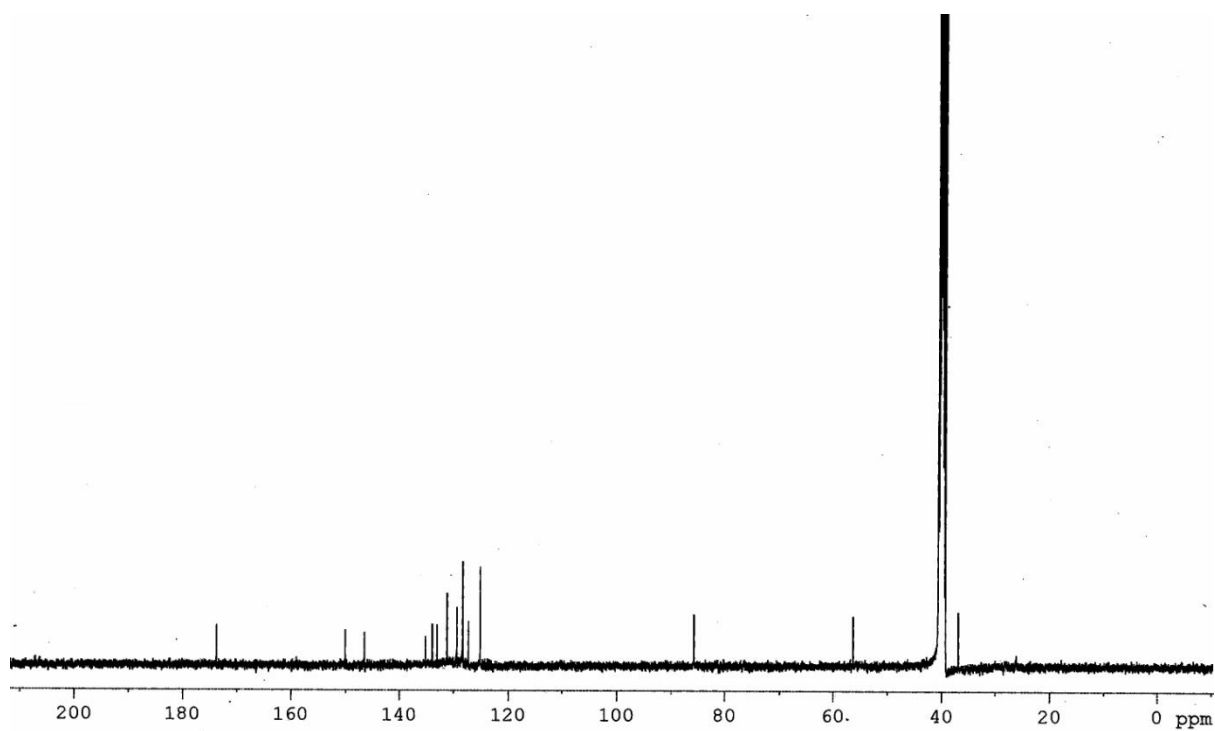

$^{13}\text{C}$  NMR of compound **3d** (100 MHz,  $\text{d}_6$ -DMSO)

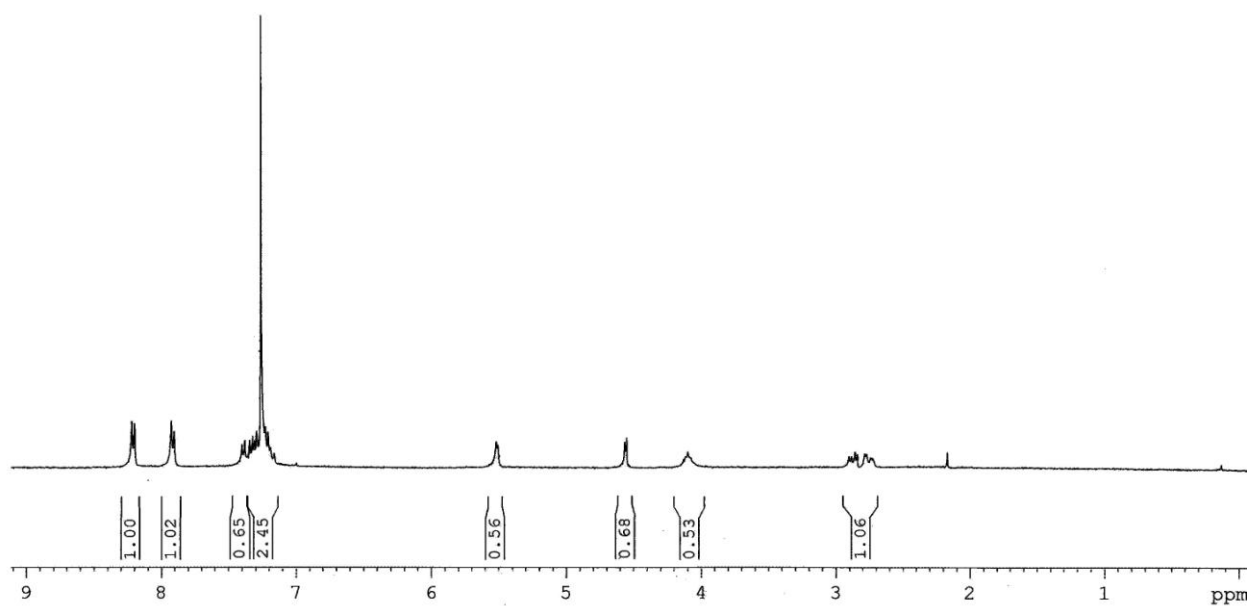

$^1\text{H}$  NMR of compound **3e** (400 MHz,  $\text{CDCl}_3$ )

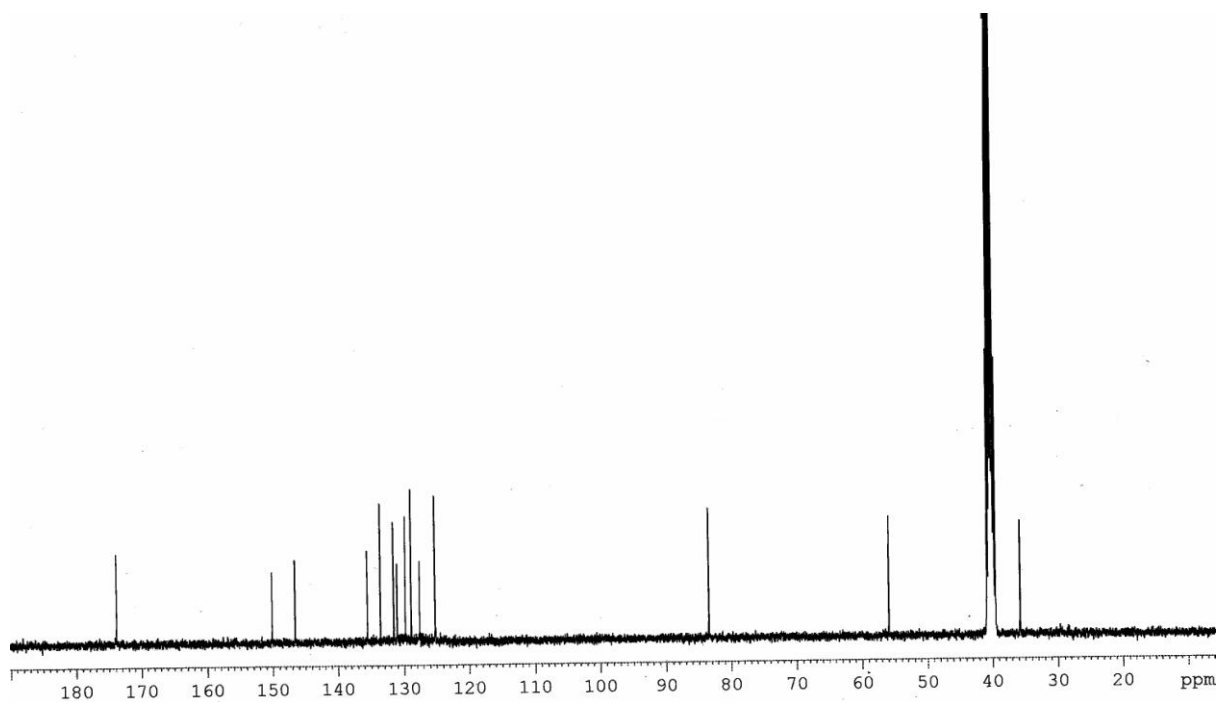

$^{13}\text{C}$  NMR of compound **3e** (100 MHz,  $\text{d}_6\text{-DMSO}$ )

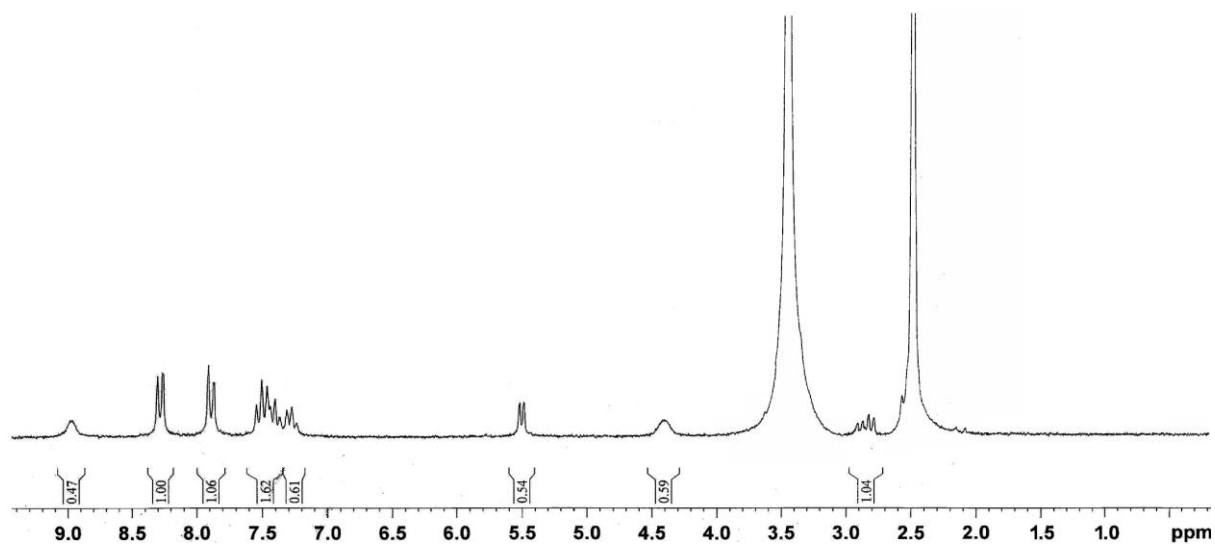

$^1\text{H}$  NMR of compound **3f** (200 MHz,  $\text{d}_6\text{-DMSO}$ )

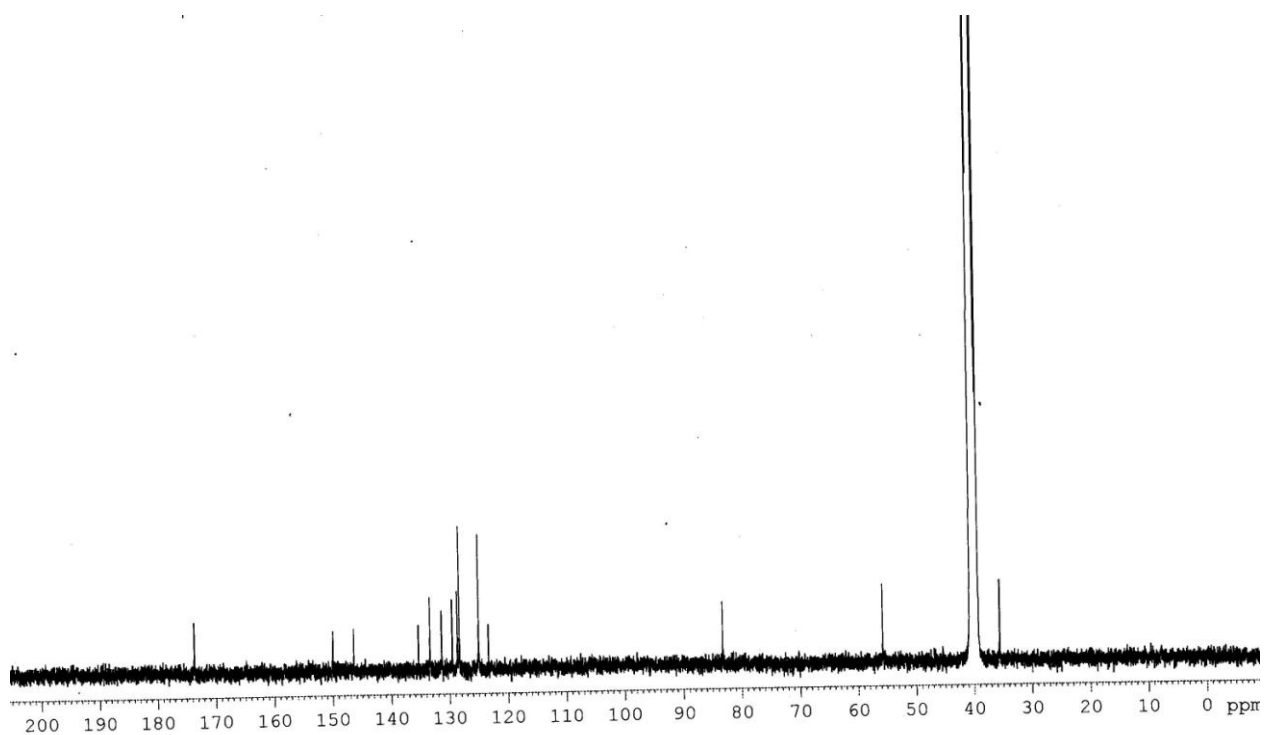

$^{13}\text{C}$  NMR of compound **3f** (100 MHz,  $\text{d}_6\text{-DMSO}$ )

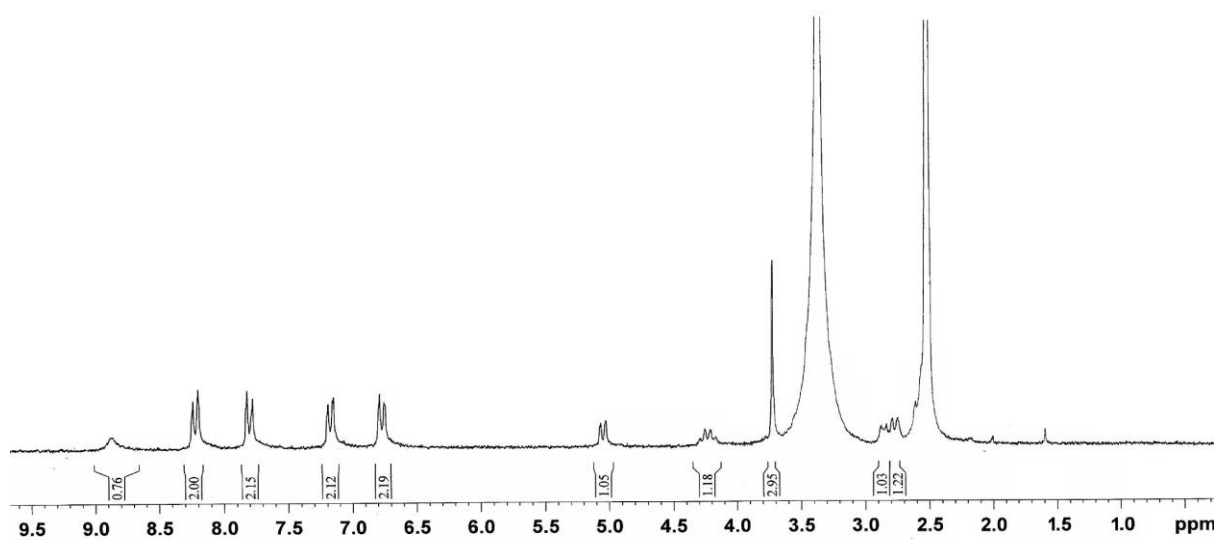

$^1\text{H}$  NMR of compound **3g** (200 MHz,  $\text{d}_6\text{-DMSO}$ )

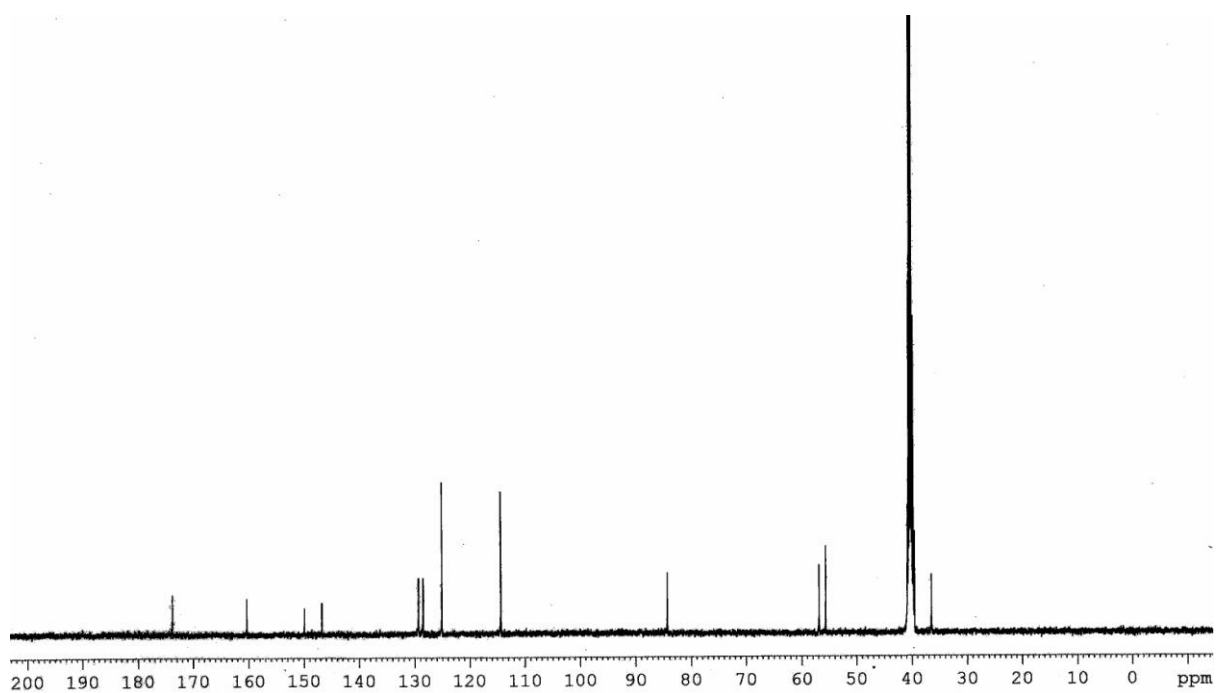

$^{13}\text{C}$  NMR of compound **3g** (100 MHz,  $\text{d}_6\text{-DMSO}$ )

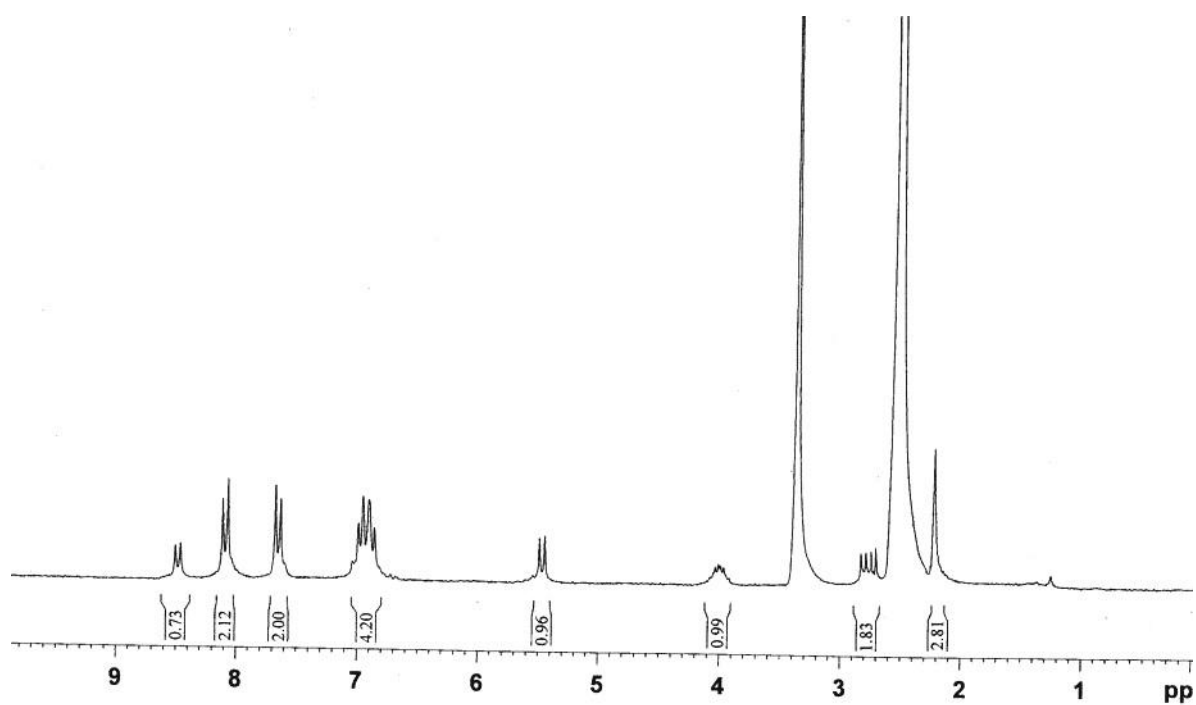

$^1\text{H}$  NMR of compound **3h** (200 MHz,  $\text{d}_6\text{-DMSO}$ )

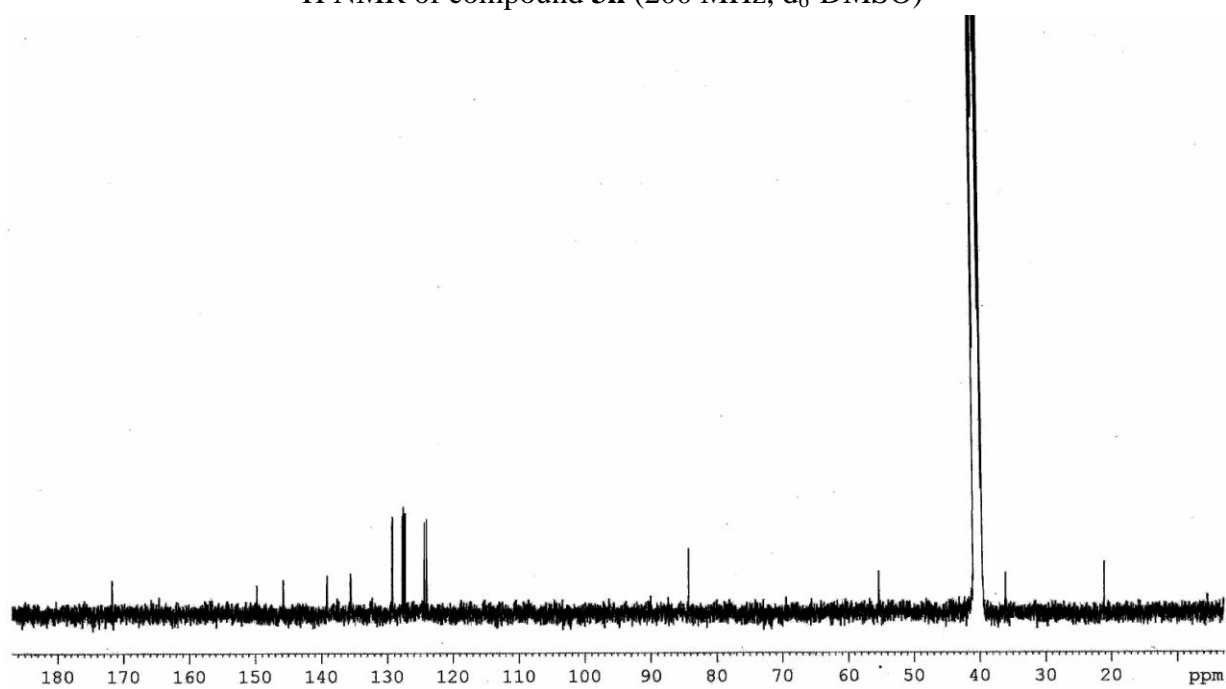

$^{13}\text{C}$  NMR of compound **3h** (100 MHz,  $\text{d}_6\text{-DMSO}$ )

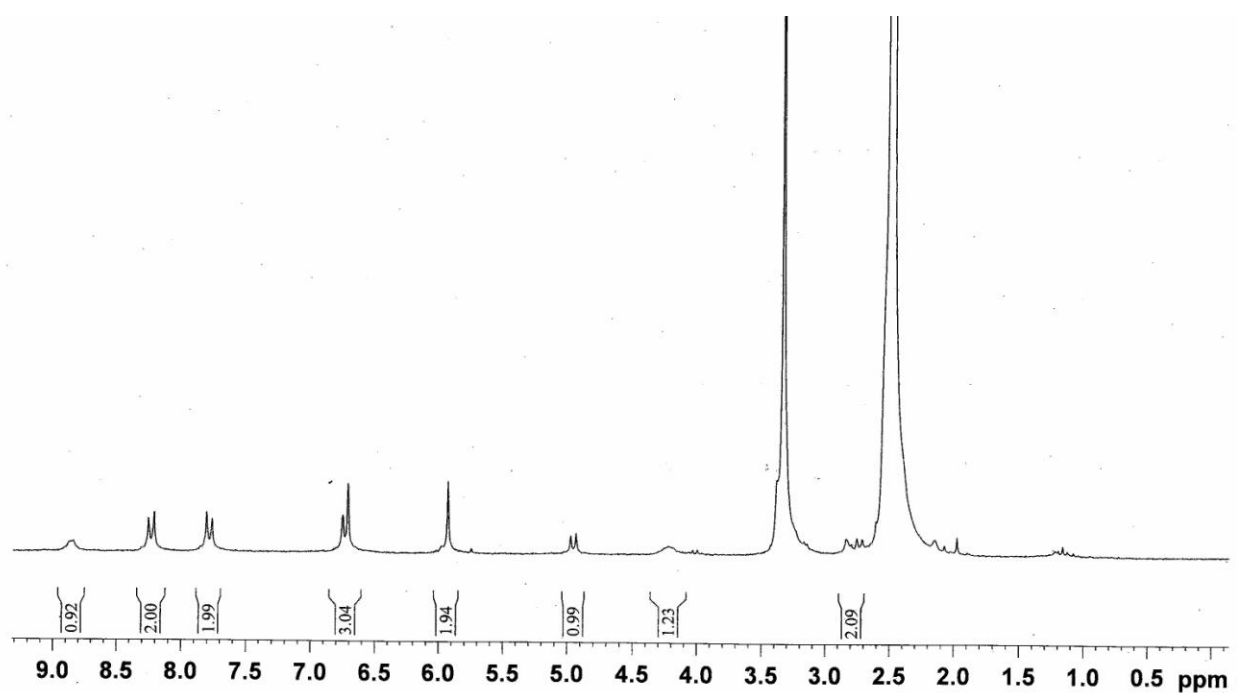

$^1\text{H}$  NMR of compound **3i** (200 MHz,  $\text{d}_6\text{-DMSO}$ )

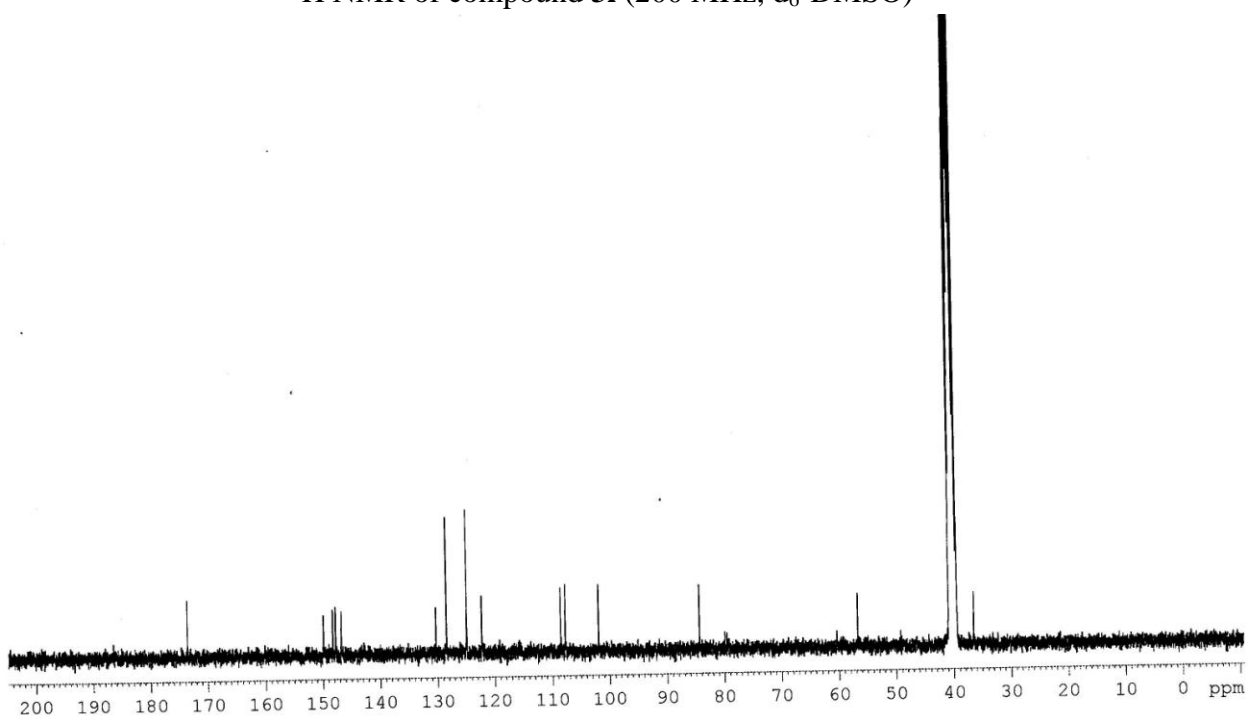

$^{13}\text{C}$  NMR of compound **3i** (100 MHz,  $\text{d}_6\text{-DMSO}$ )

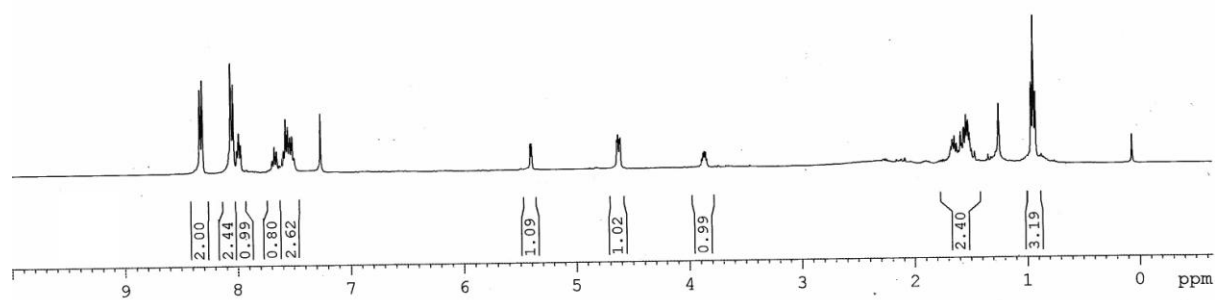

<sup>1</sup>H NMR of compound **10** (400 MHz, CDCl<sub>3</sub>)

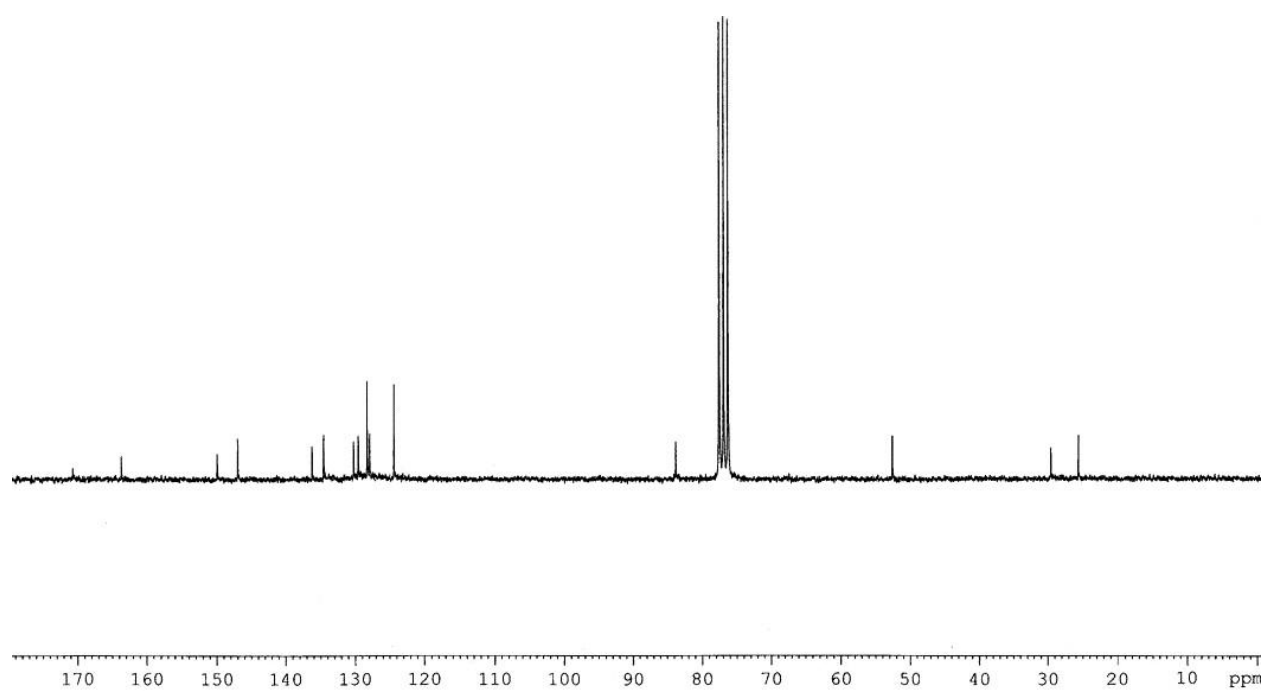

<sup>13</sup>C NMR of compound **10** (100 MHz, CDCl<sub>3</sub>)

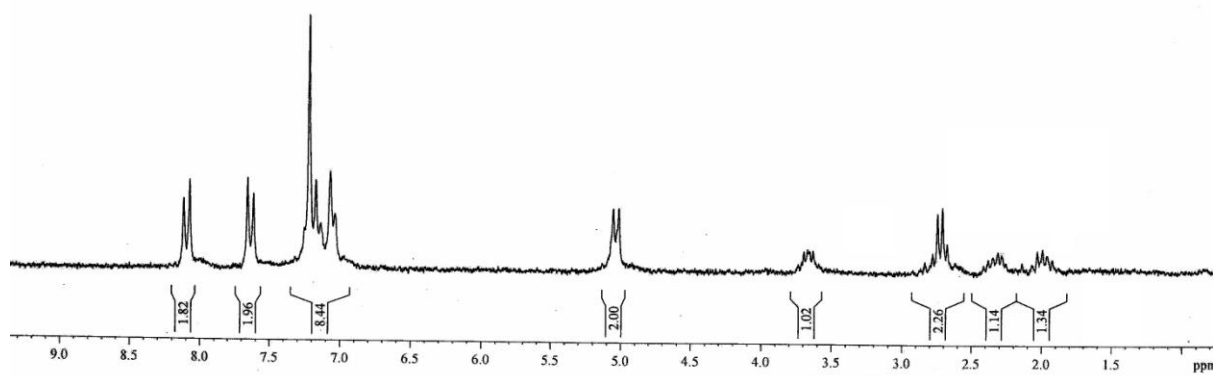

<sup>1</sup>H NMR of compound **7a** (200 MHz, CDCl<sub>3</sub>)

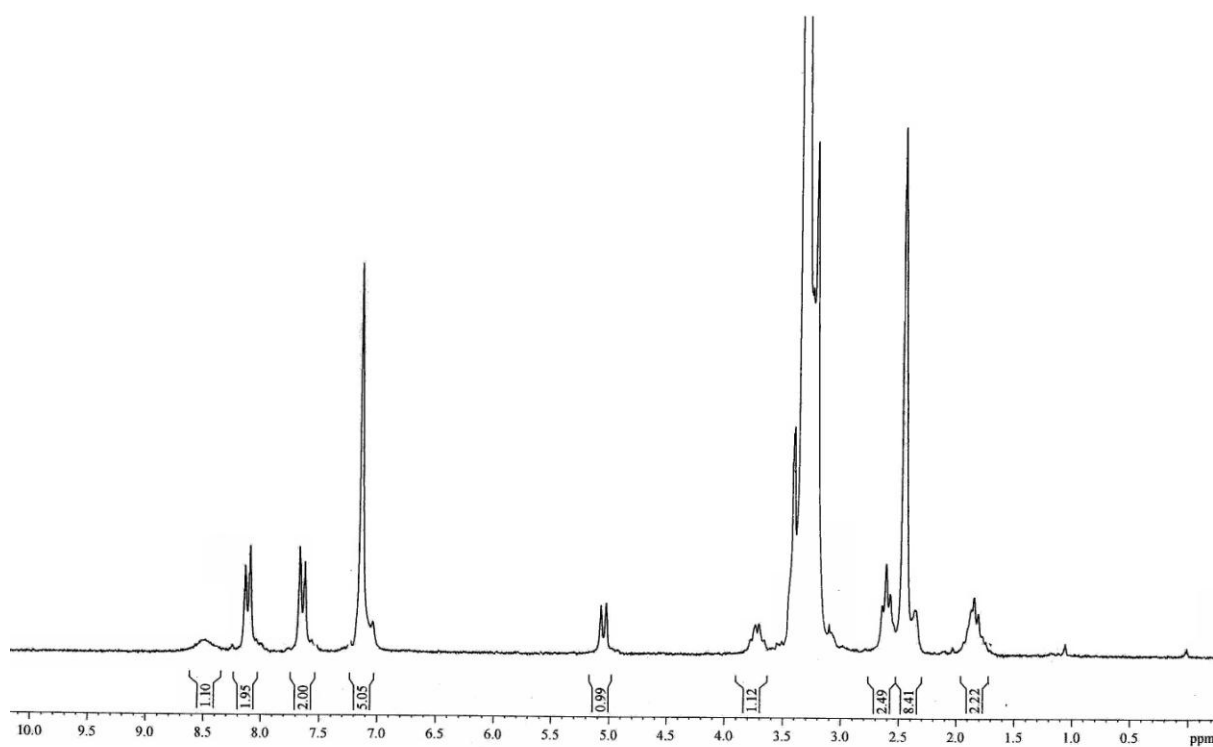

<sup>1</sup>H NMR of compound **7a** (200 MHz, d<sub>6</sub>-DMSO)

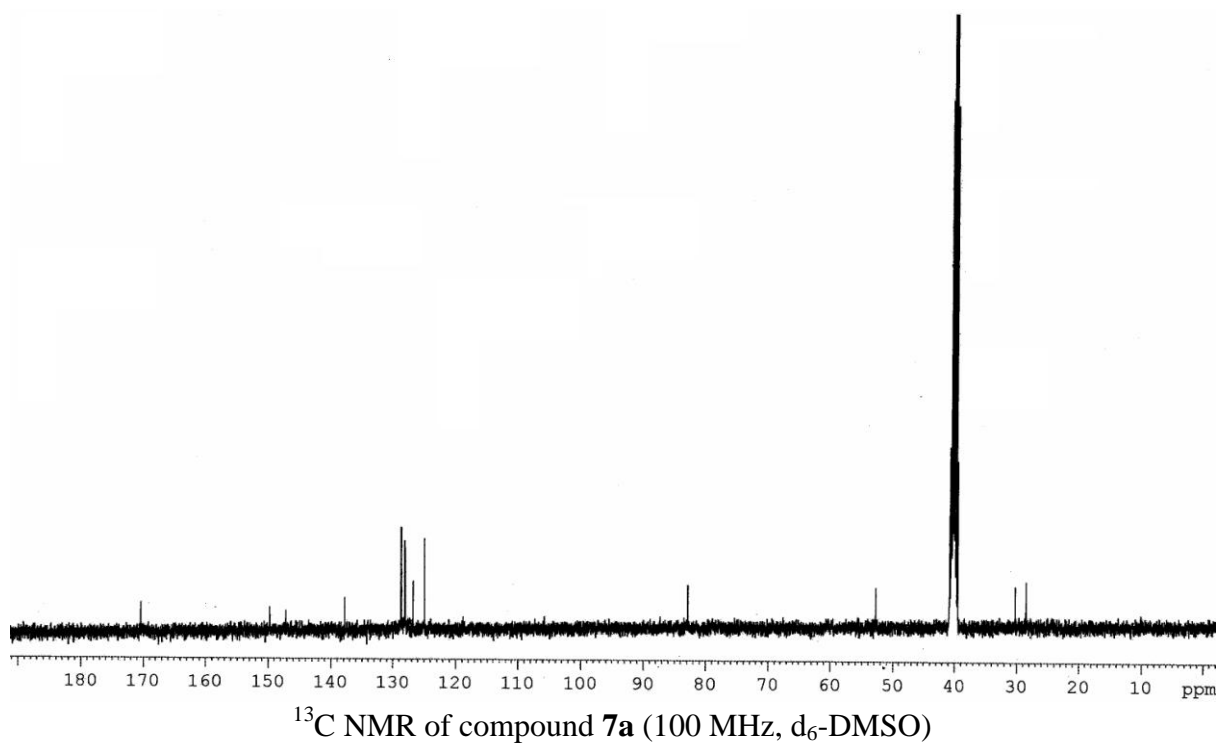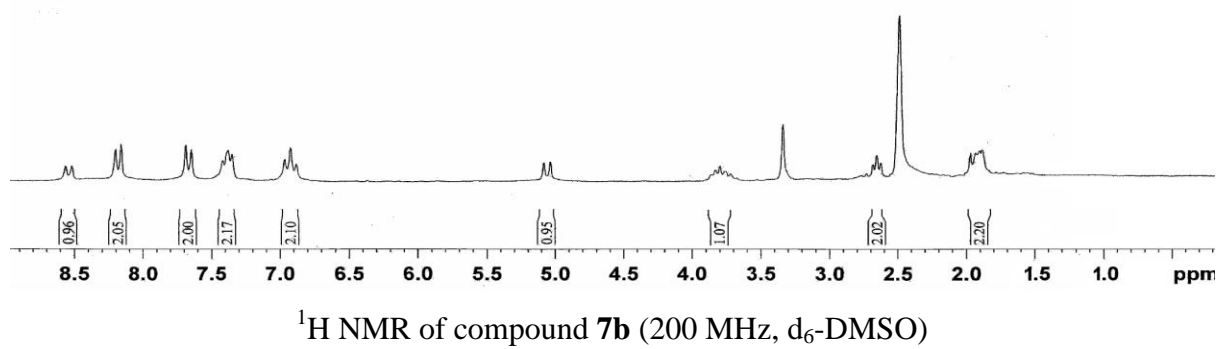

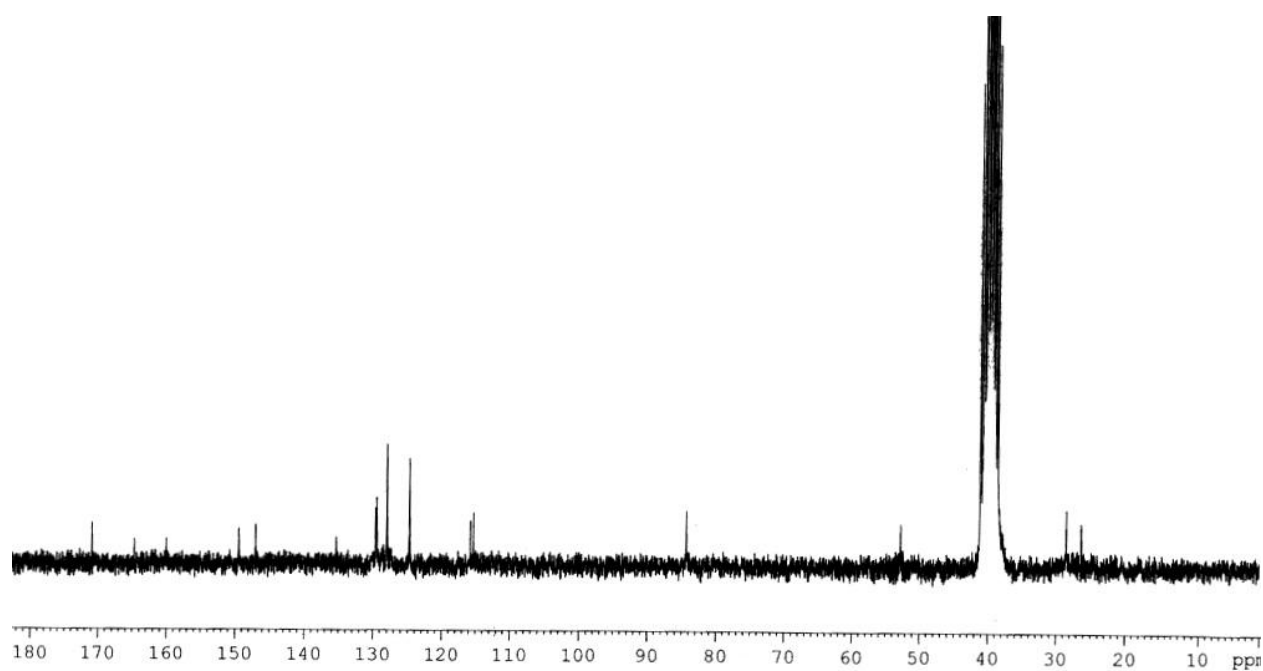

$^{13}\text{C}$  NMR of compound **7b** (50 MHz,  $\text{d}_6$ -DMSO)

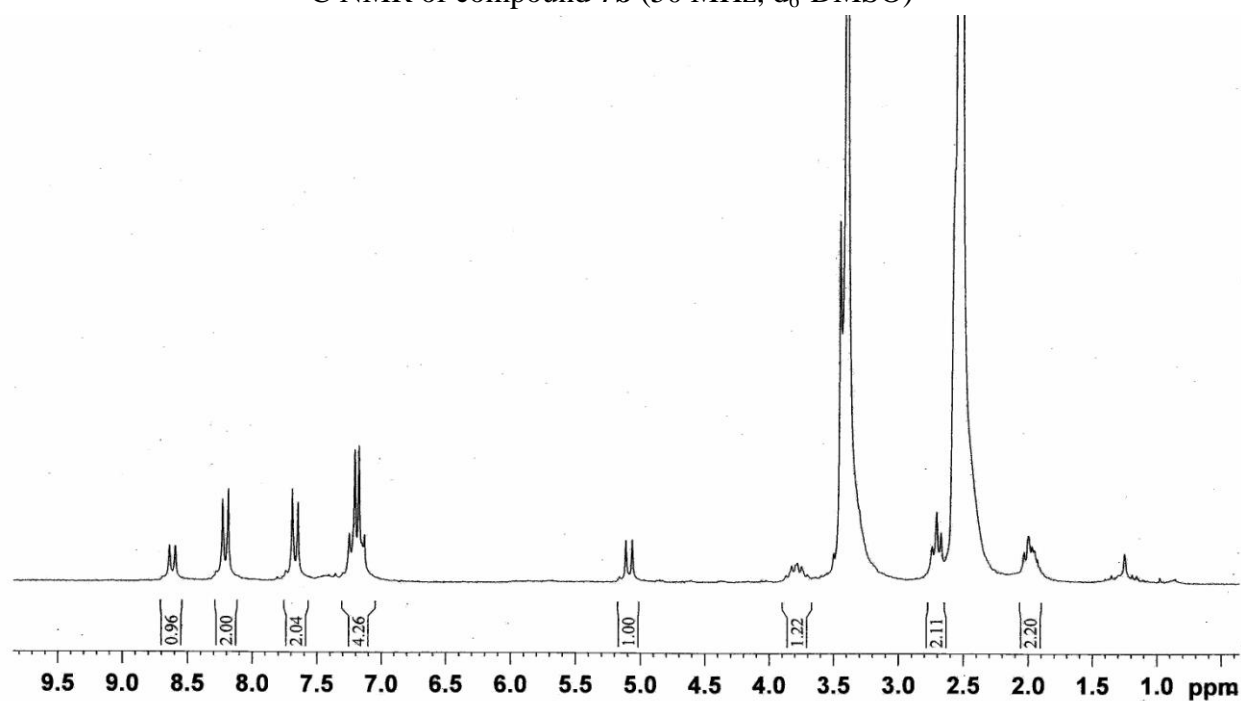

$^1\text{H}$  NMR of compound **7c** (200 MHz,  $\text{d}_6$ -DMSO)

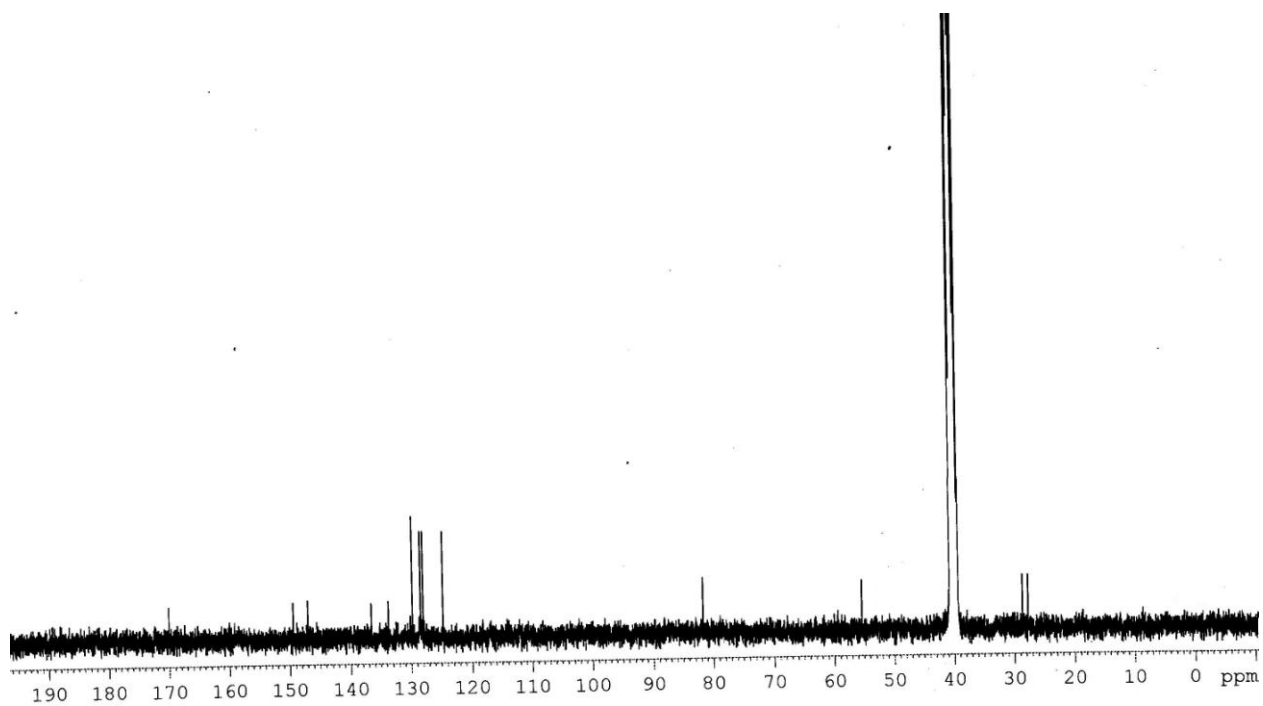

$^{13}\text{C}$  NMR of compound **7c** (100 MHz,  $\text{d}_6\text{-DMSO}$ )

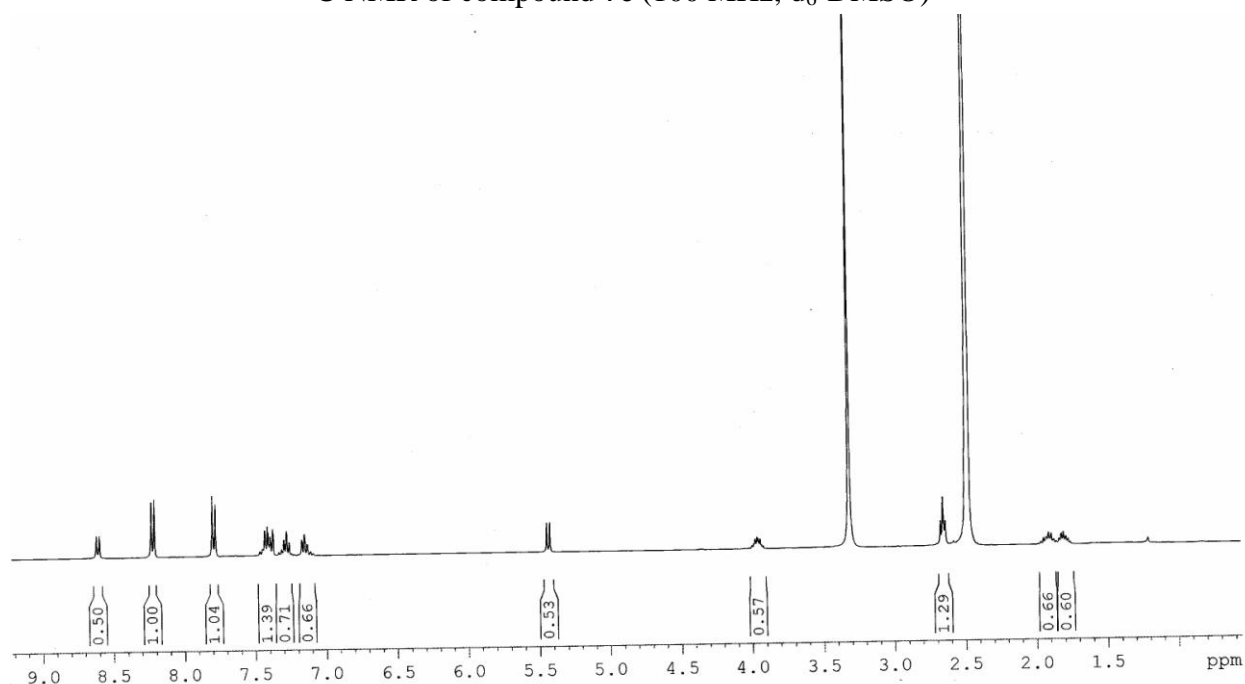

$^1\text{H}$  NMR of compound **7d** (400 MHz,  $\text{d}_6\text{-DMSO}$ )

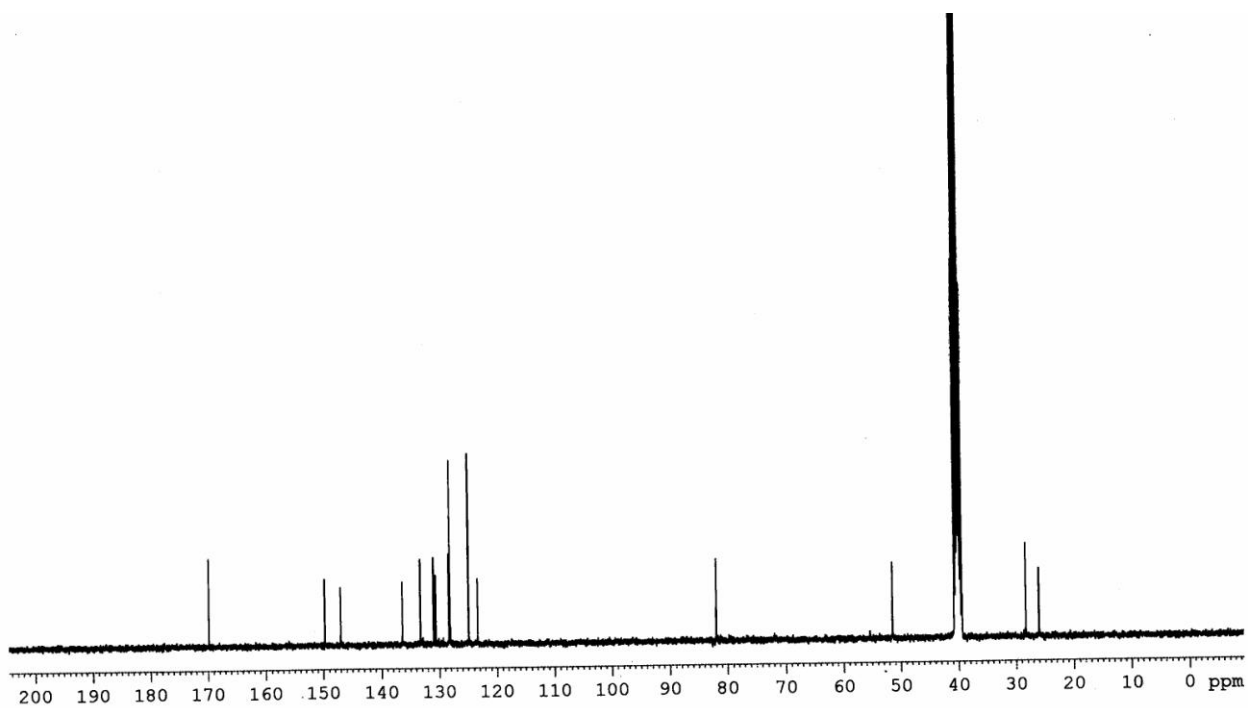

$^{13}\text{C}$  NMR of compound **7d** (100 MHz,  $\text{d}_6\text{-DMSO}$ )

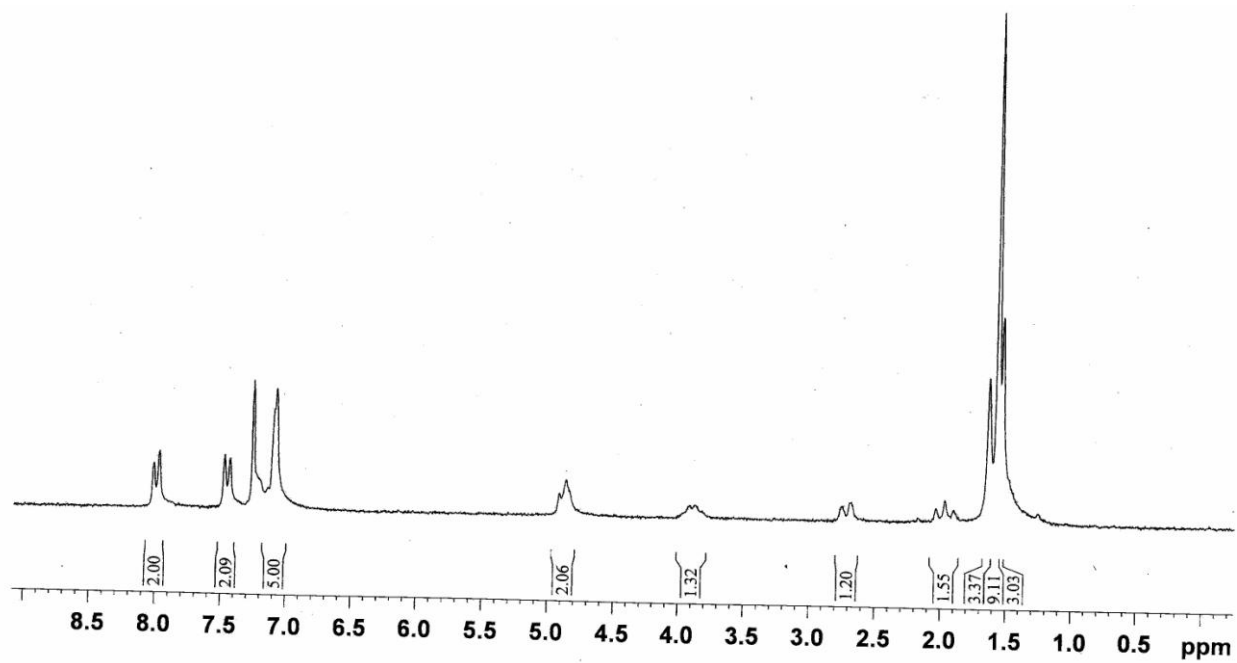

$^1\text{H}$  NMR of compound **13a** (200 MHz,  $\text{CDCl}_3$ )

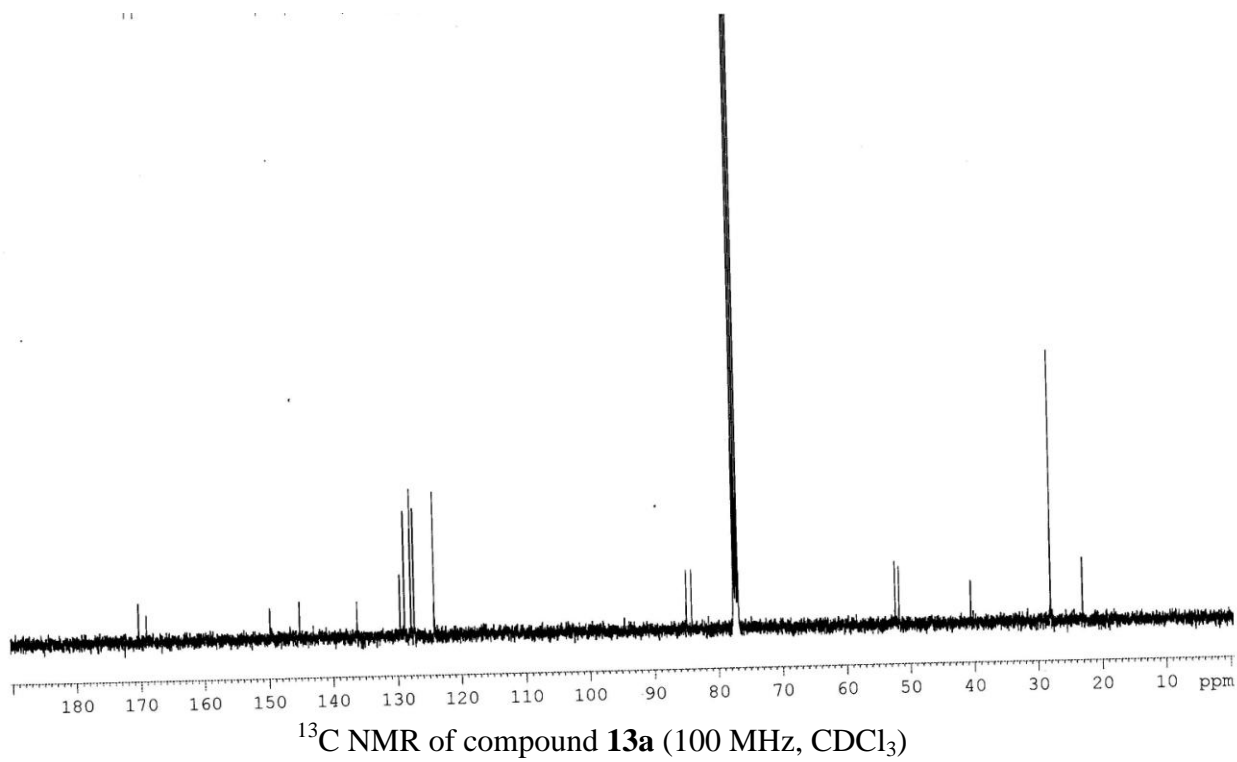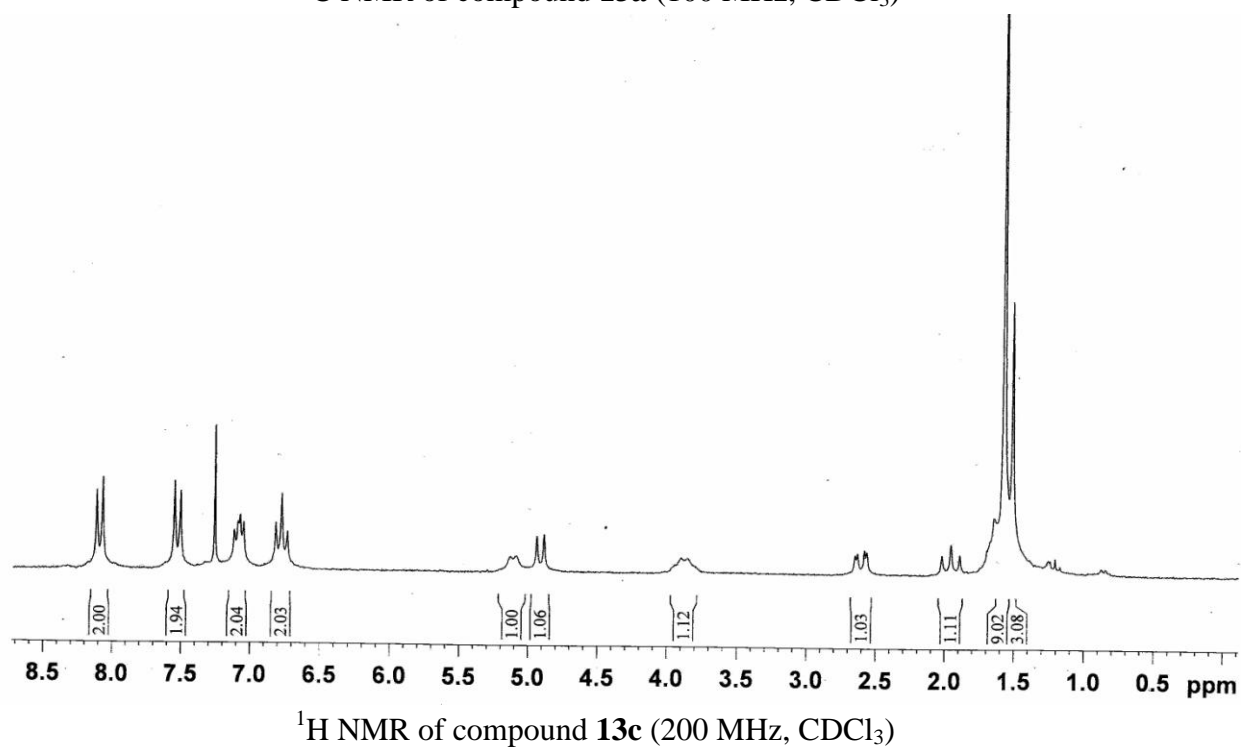

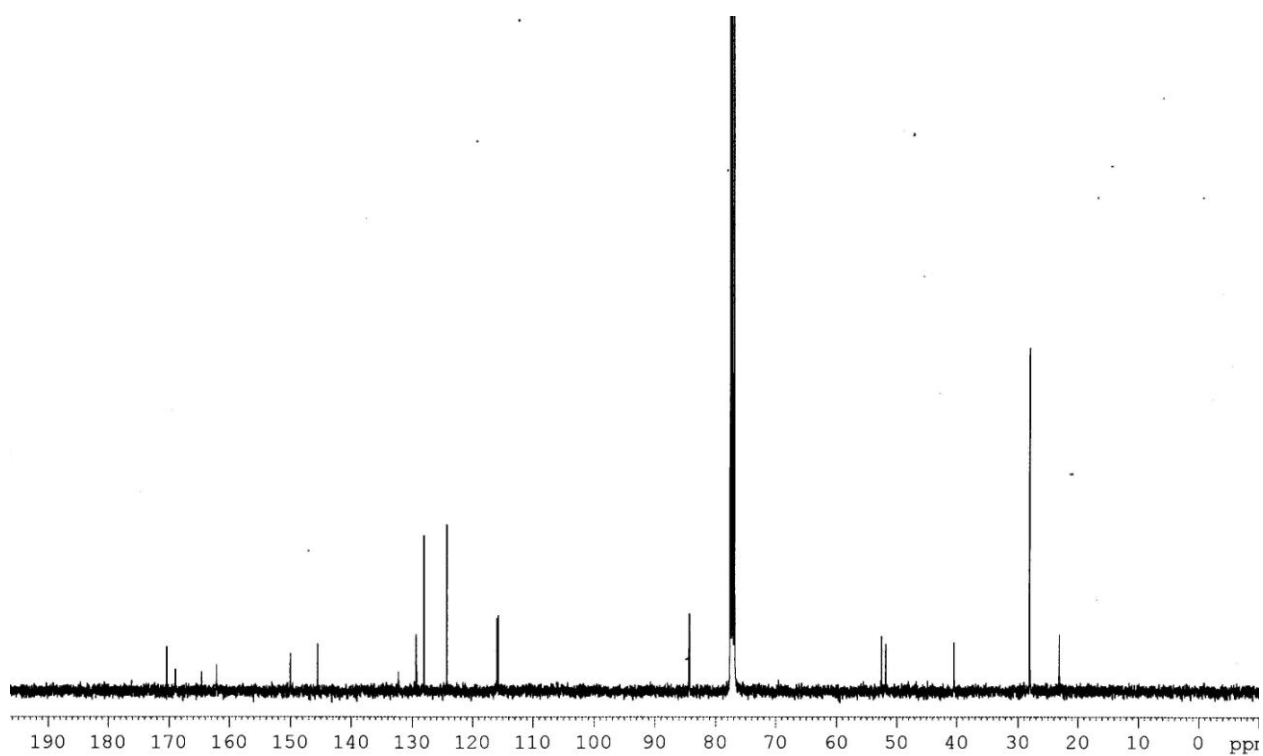

$^{13}\text{C}$  NMR of compound **13c** (100 MHz,  $\text{CDCl}_3$ )

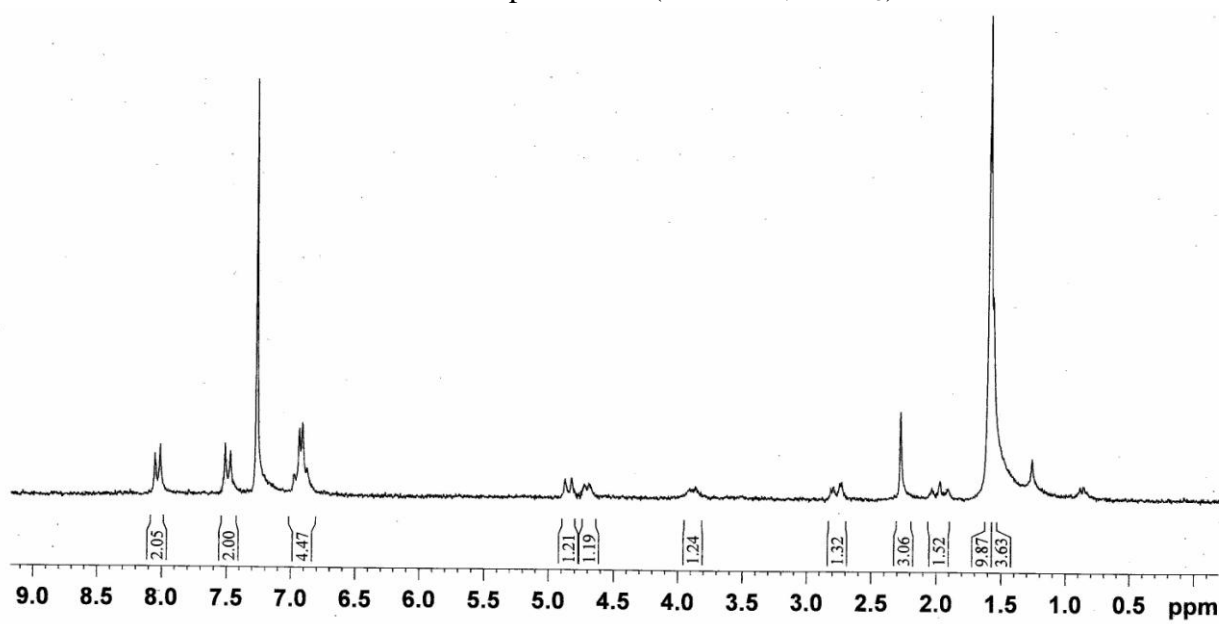

$^1\text{H}$  NMR of compound **13b** (200 MHz,  $\text{CDCl}_3$ )

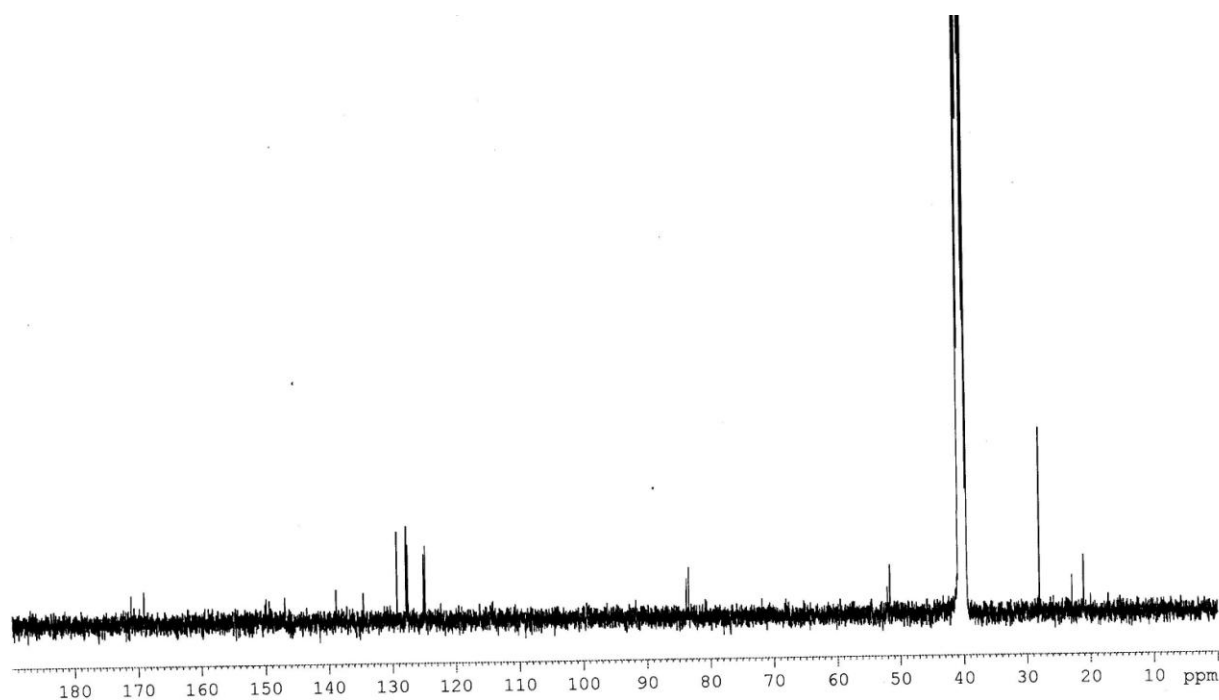

$^{13}\text{C}$  NMR of compound **13b** (100 MHz,  $\text{d}_6\text{-DMSO}$ )

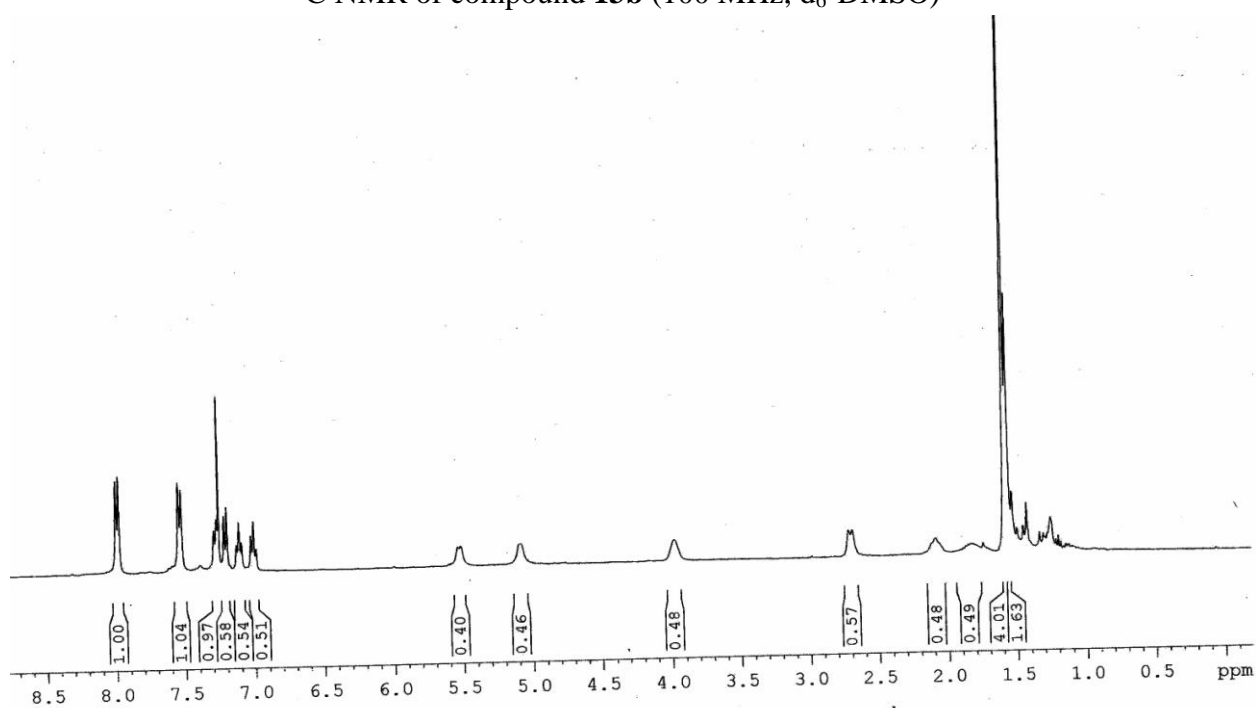

$^1\text{H}$  NMR of compound **13d** (400 MHz,  $\text{CDCl}_3$ )

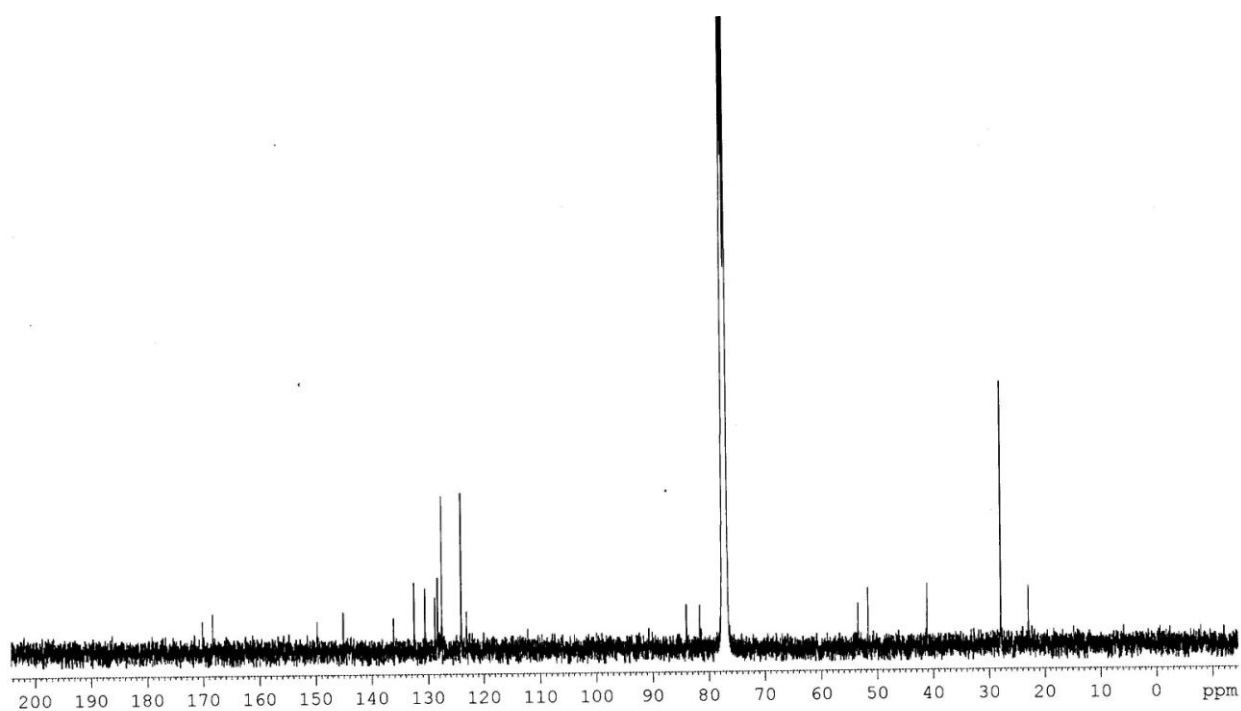

$^{13}\text{C}$  NMR of compound **13d** (100 MHz,  $\text{CDCl}_3$ )

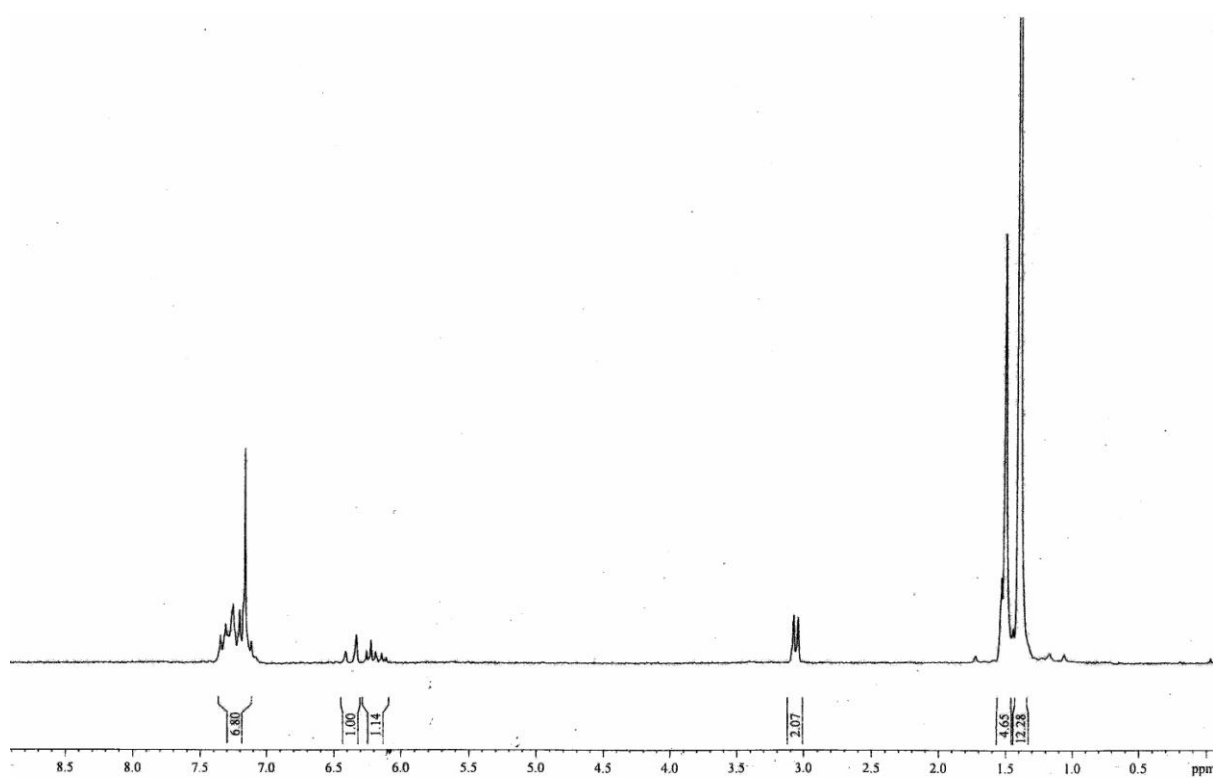

$^1\text{H}$  NMR of compound **1a** (200 MHz,  $\text{CDCl}_3$ )

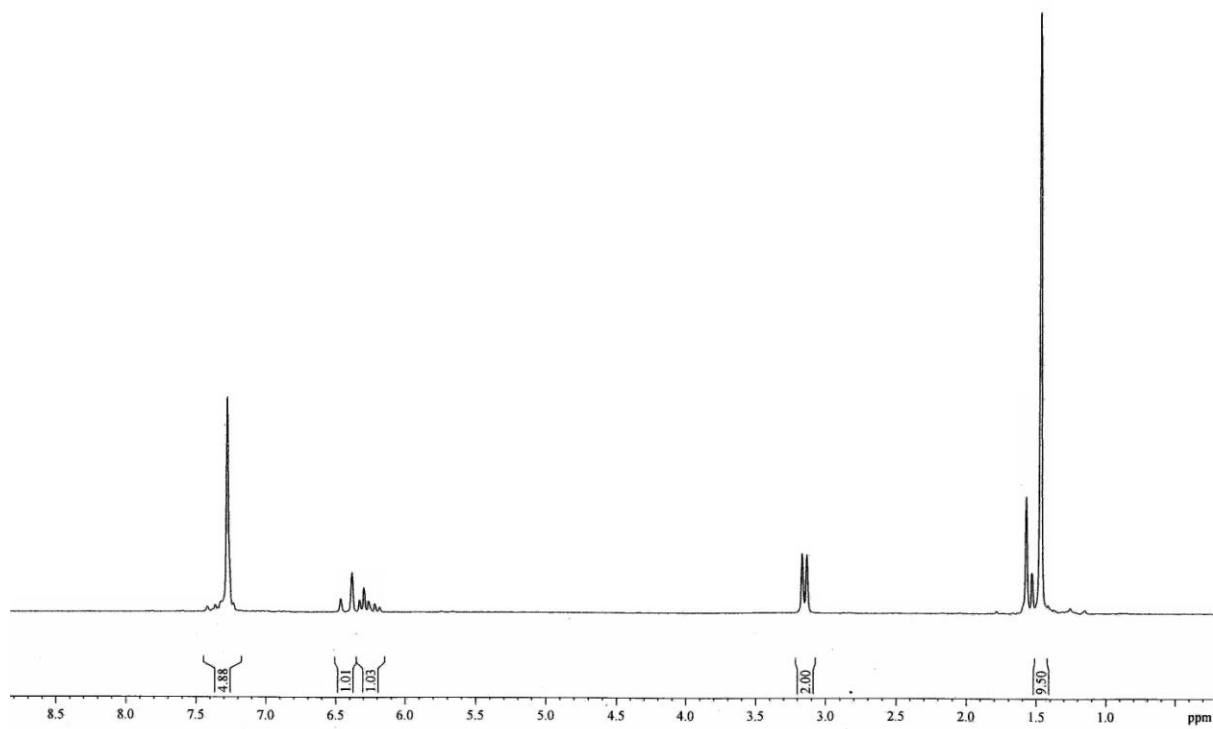

$^1\text{H}$  NMR of compound **1c** (200 MHz,  $\text{CDCl}_3$ )

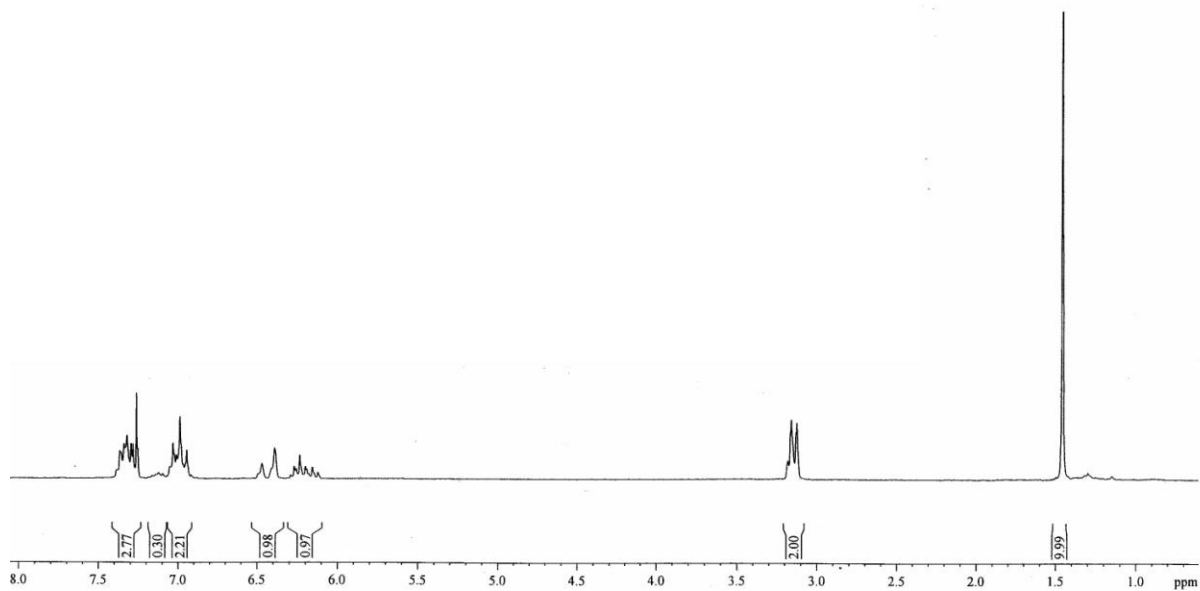

$^1\text{H}$  NMR of compound **1b** (200 MHz,  $\text{CDCl}_3$ )

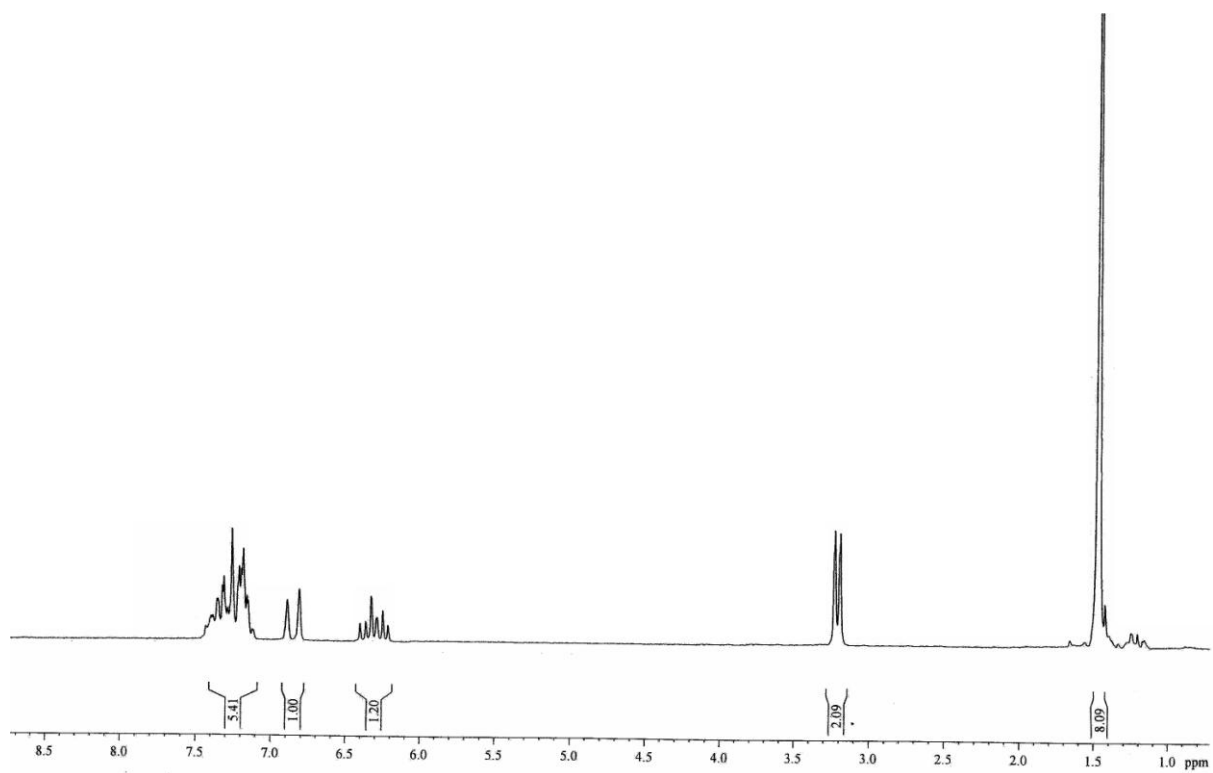

$^1\text{H}$  NMR of compound **1d** (200 MHz,  $\text{CDCl}_3$ )

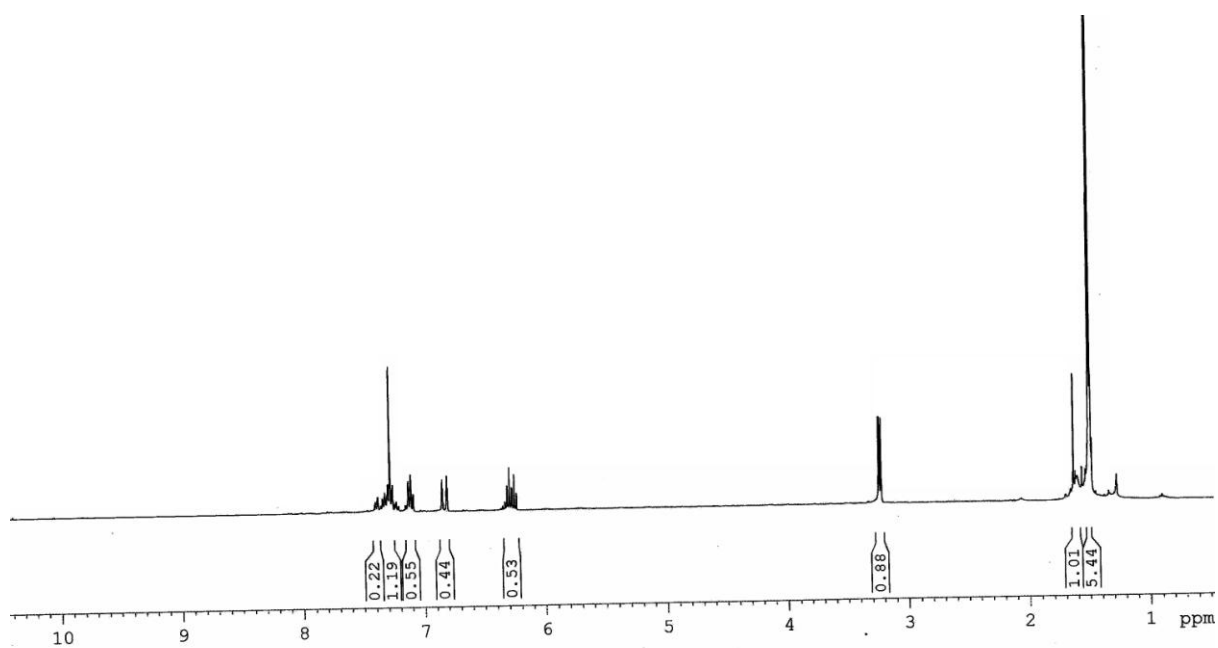

$^1\text{H}$  NMR of compound **1e** (400 MHz,  $\text{CDCl}_3$ )

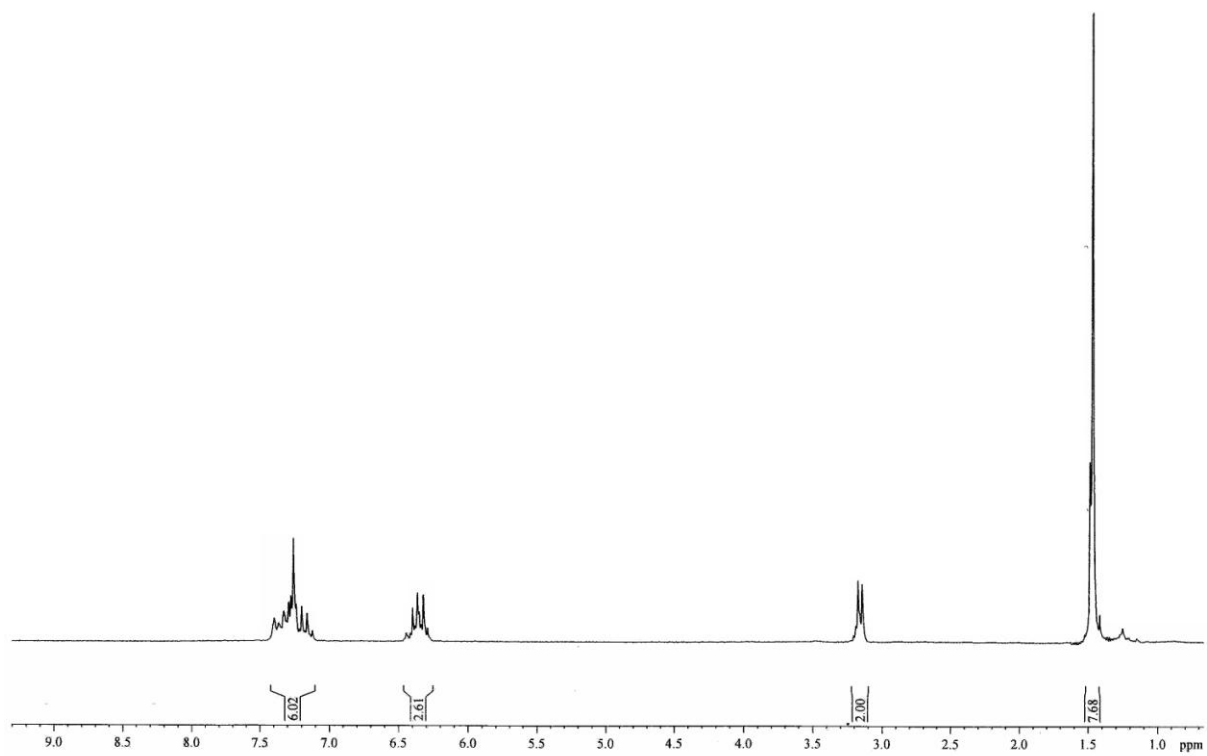

$^1\text{H}$  NMR of compound **1f** (200 MHz,  $\text{CDCl}_3$ )

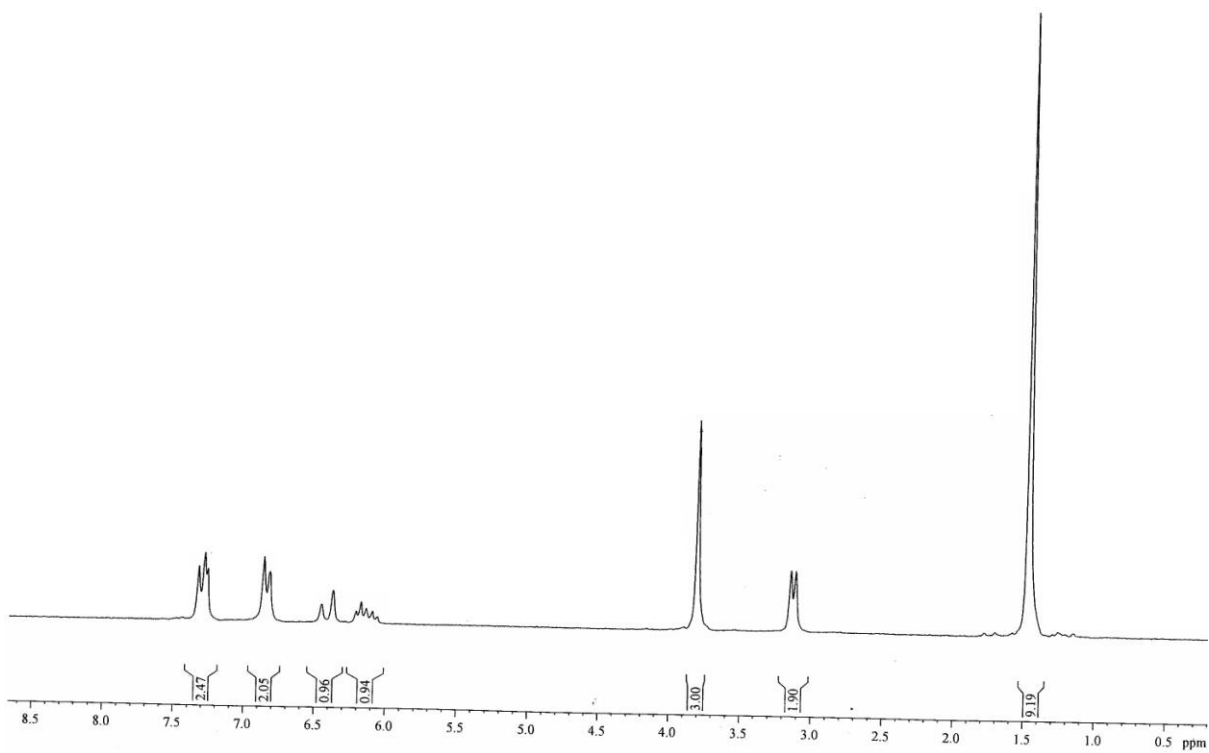

$^1\text{H}$  NMR of compound **1g** (200 MHz,  $\text{CDCl}_3$ )

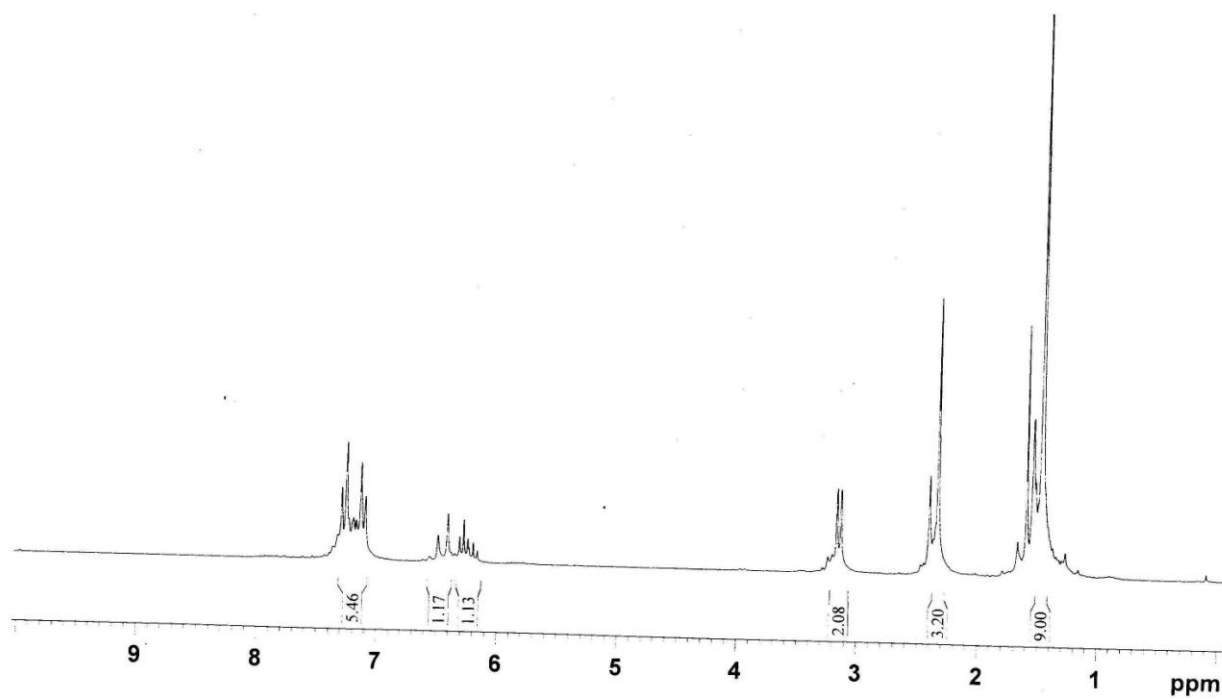

$^1\text{H}$  NMR of compound **1h** (200 MHz,  $\text{CDCl}_3$ )

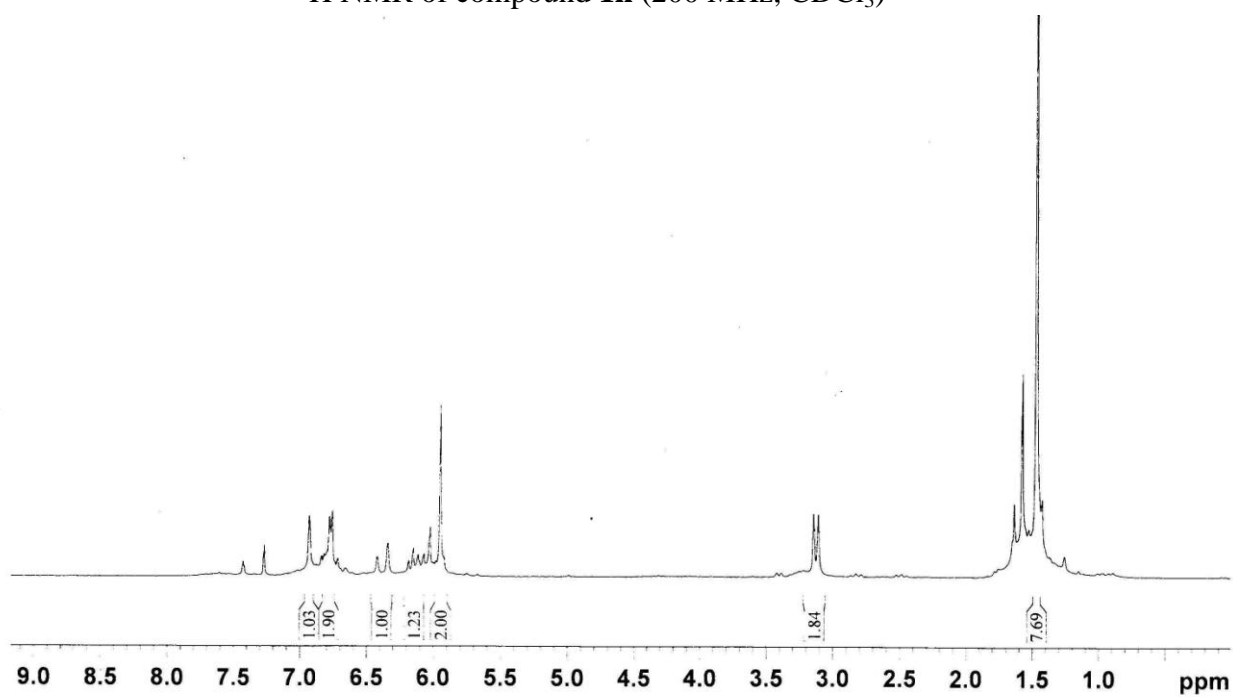

$^1\text{H}$  NMR of compound **1i** (200 MHz,  $\text{CDCl}_3$ )

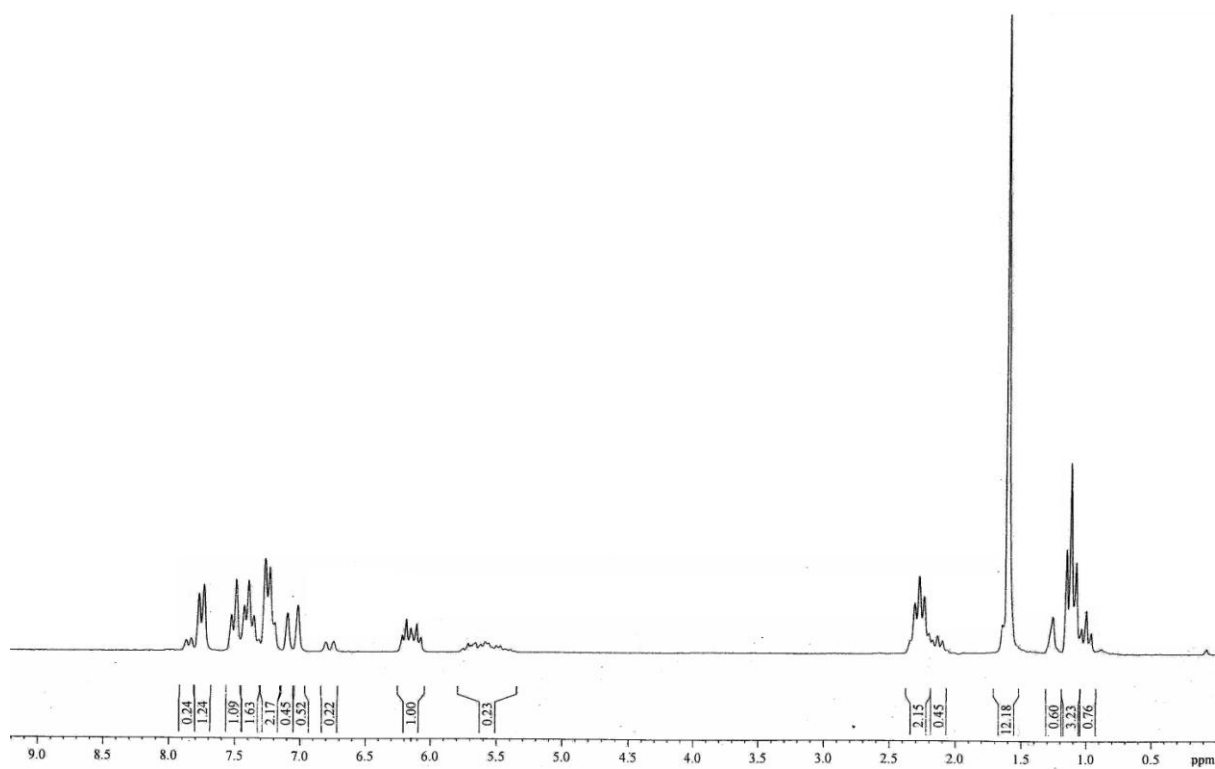

<sup>1</sup>H NMR of compound **8** (200 MHz, CDCl<sub>3</sub>)

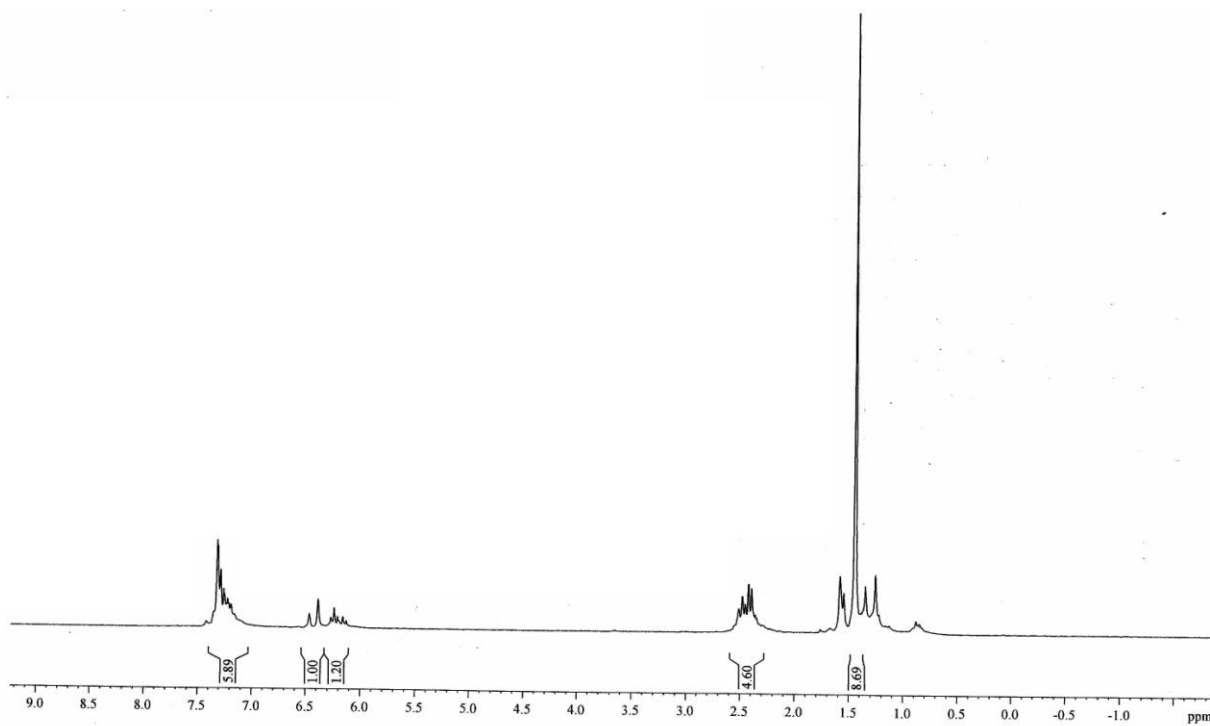

<sup>1</sup>H NMR of compound **5a** (200 MHz, CDCl<sub>3</sub>)

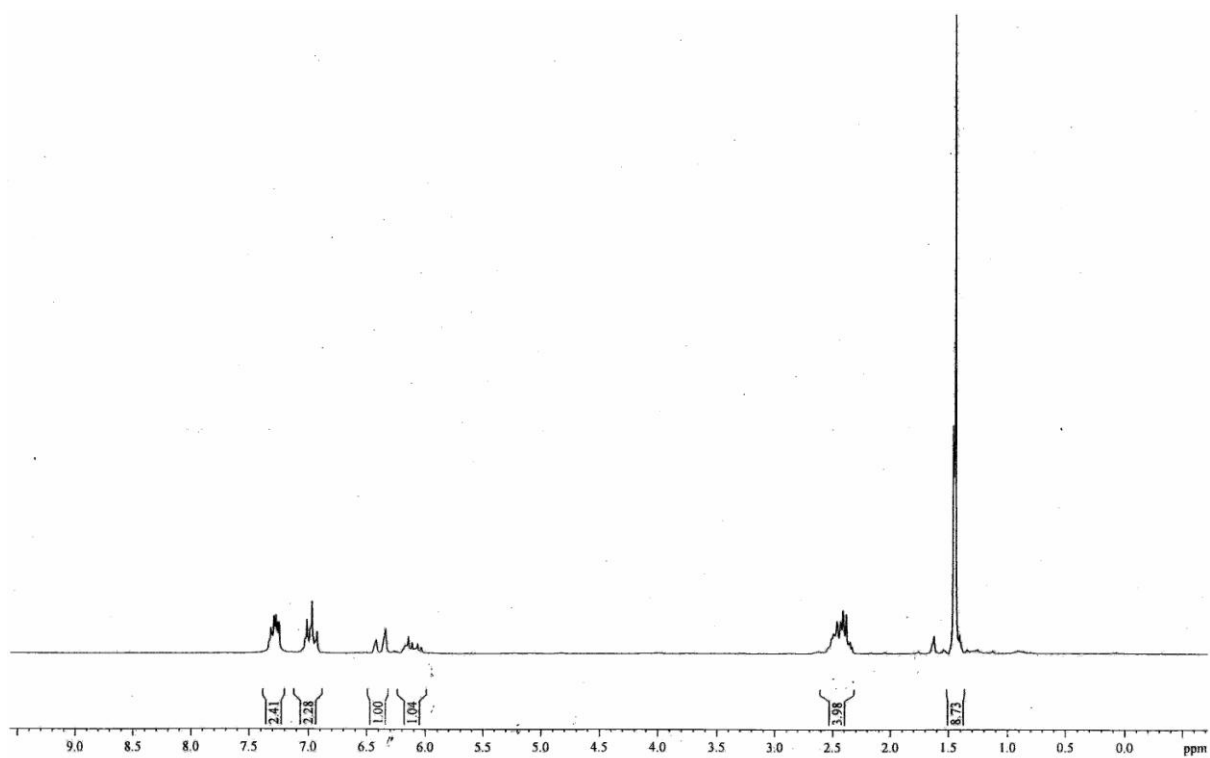

$^1\text{H}$  NMR of compound **5b** (200 MHz,  $\text{CDCl}_3$ )

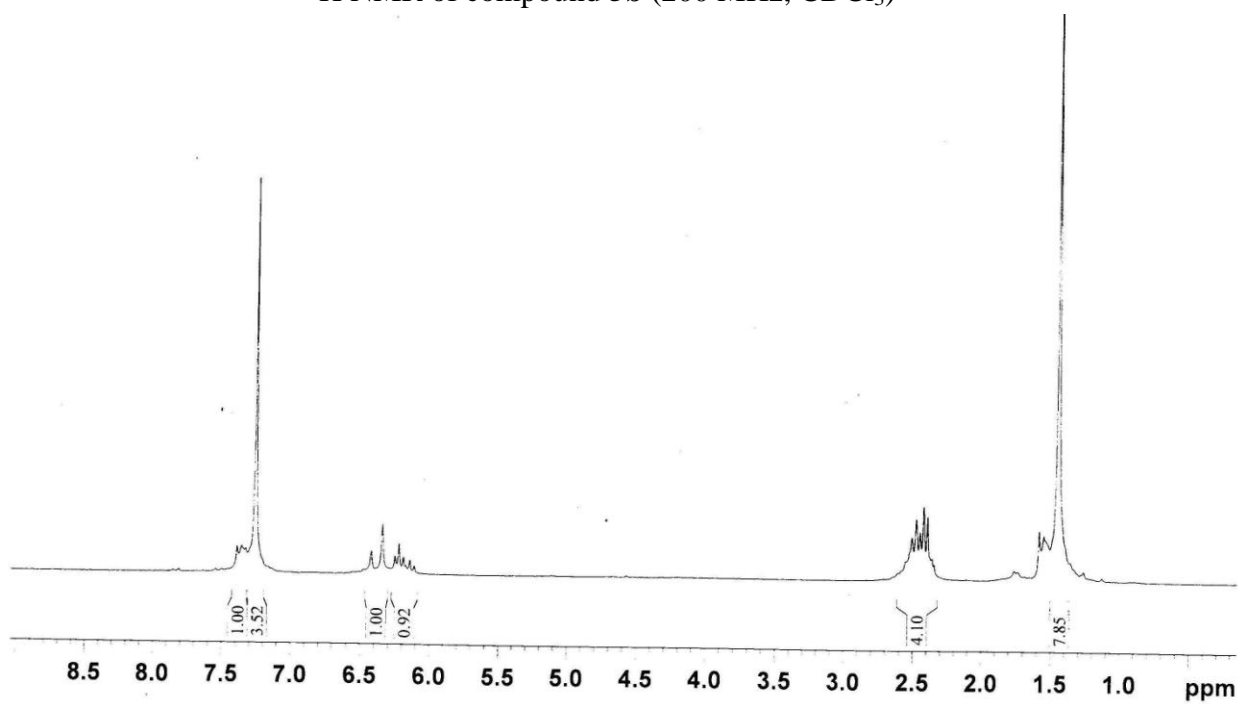

$^1\text{H}$  NMR of compound **5c** (200 MHz,  $\text{CDCl}_3$ )

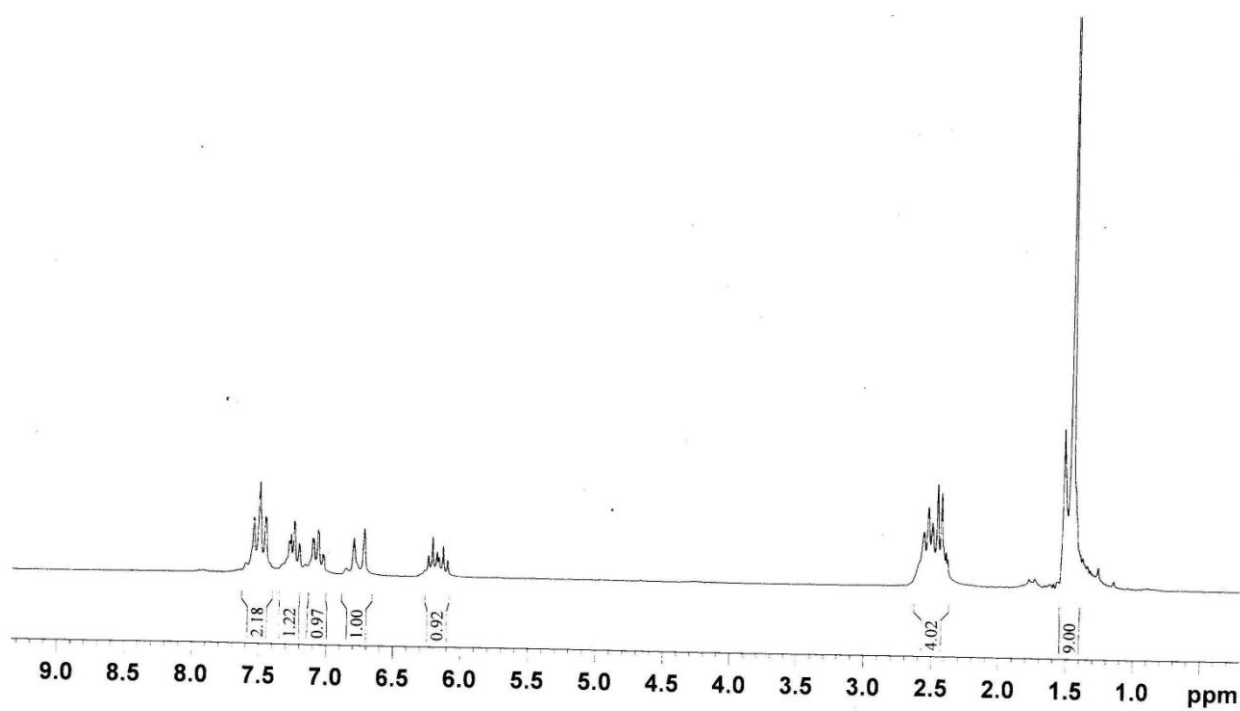

$^1\text{H}$  NMR of compound **5d** (200 MHz,  $\text{CDCl}_3$ )

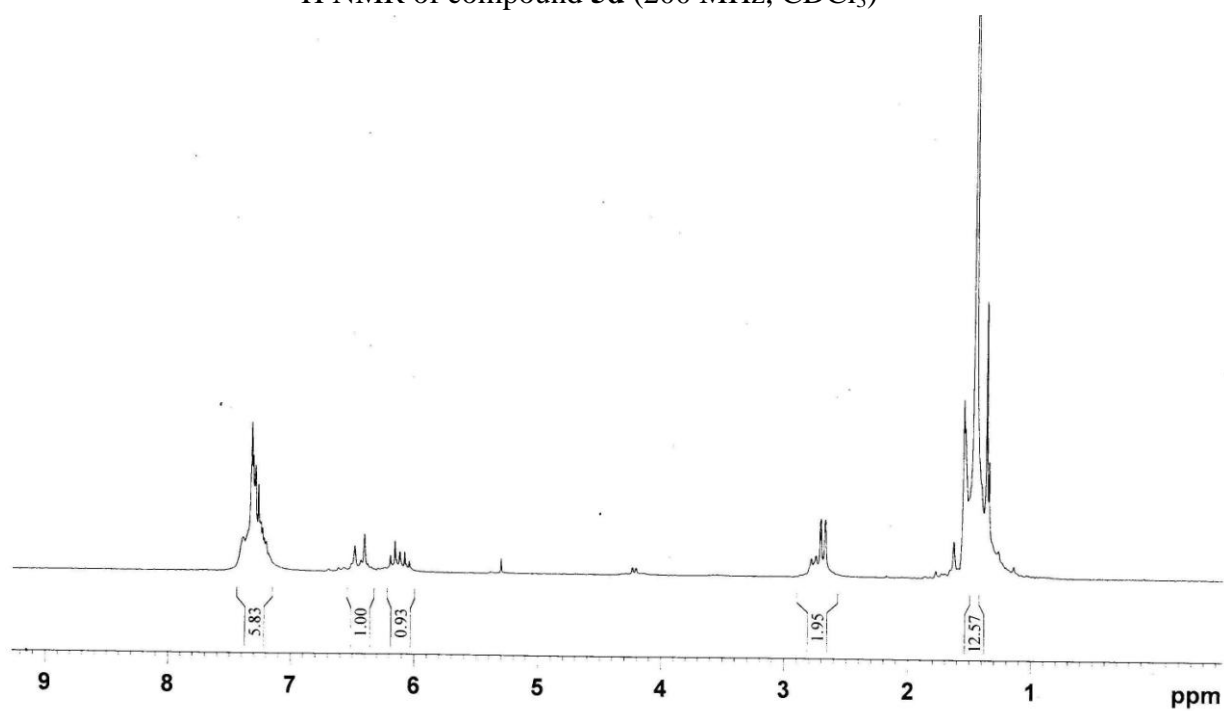

$^1\text{H}$  NMR of compound **11a** (200 MHz,  $\text{CDCl}_3$ )

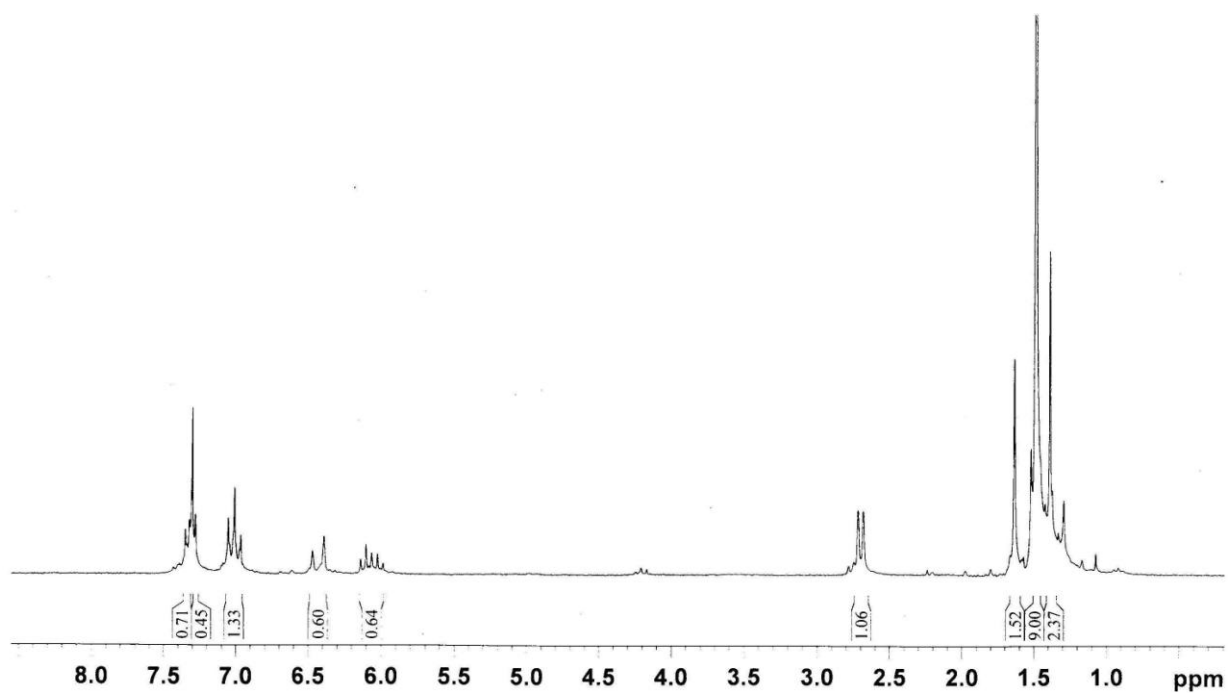

<sup>1</sup>H NMR of compound **11b** (200 MHz, CDCl<sub>3</sub>)

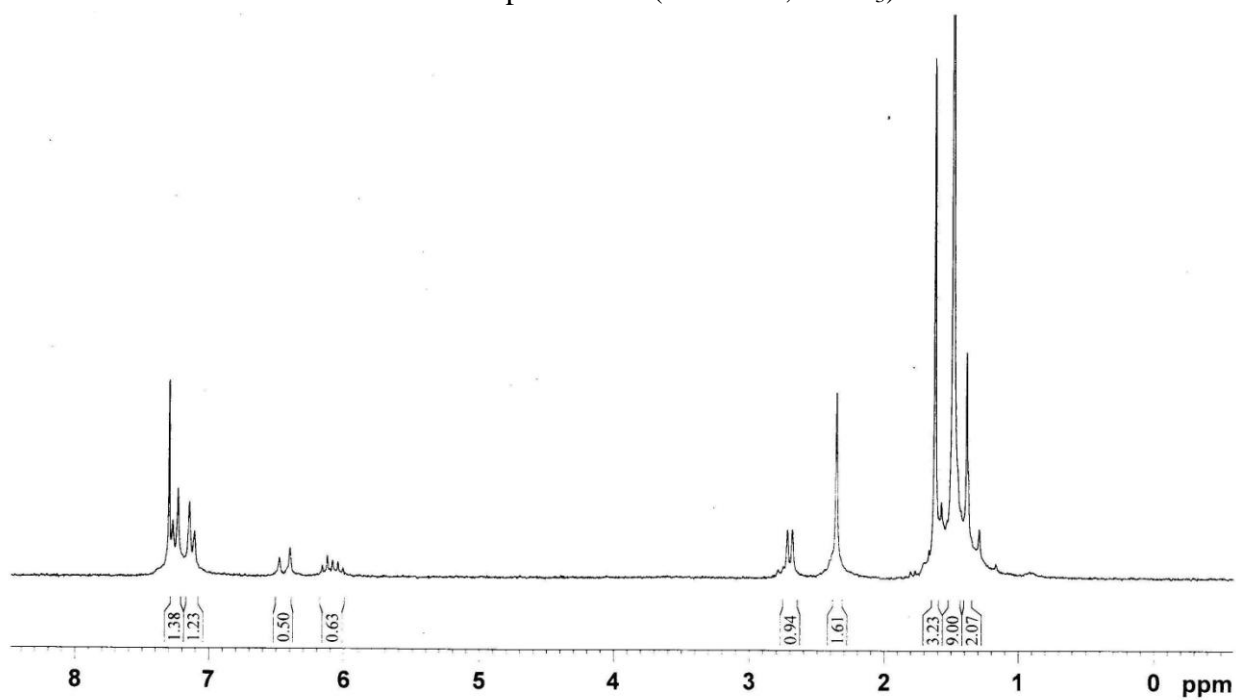

<sup>1</sup>H NMR of compound **11c** (200 MHz, CDCl<sub>3</sub>)

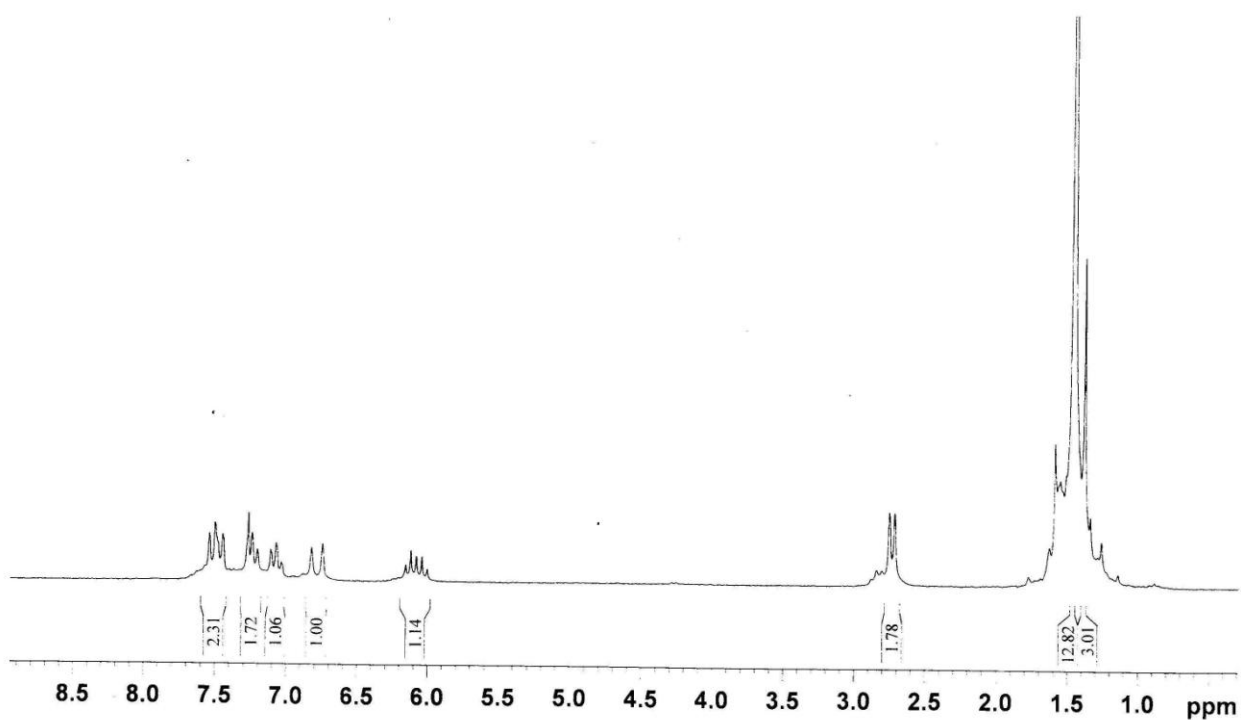

<sup>1</sup>H NMR of compound **11d** (200 MHz, CDCl<sub>3</sub>)

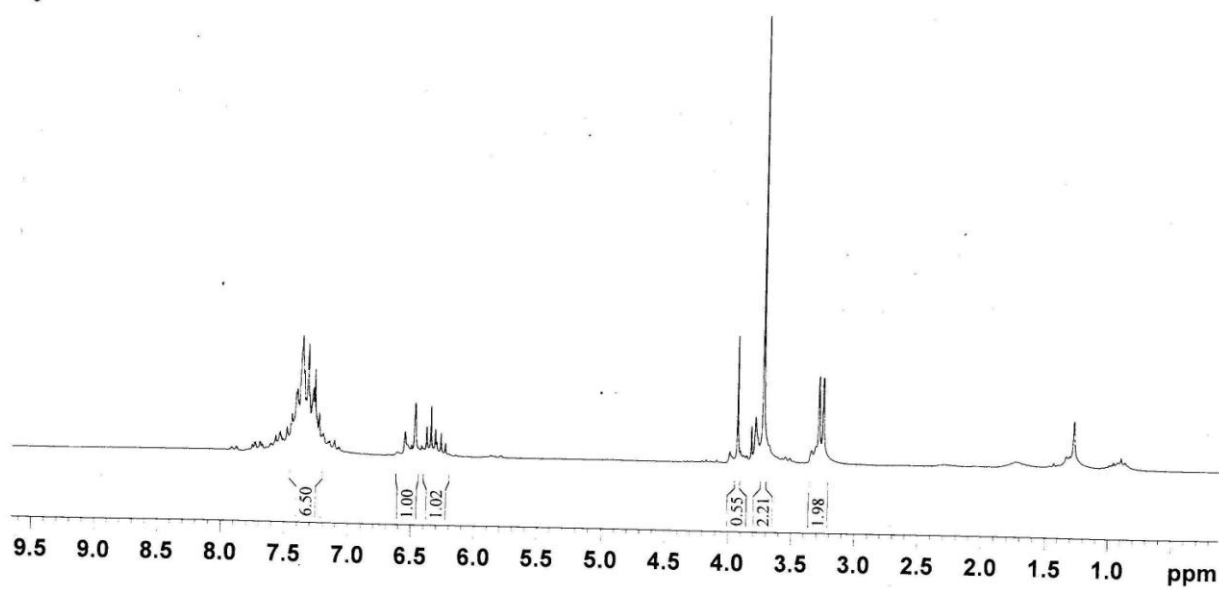

<sup>1</sup>H NMR of compound **1a'** (200 MHz, CDCl<sub>3</sub>)

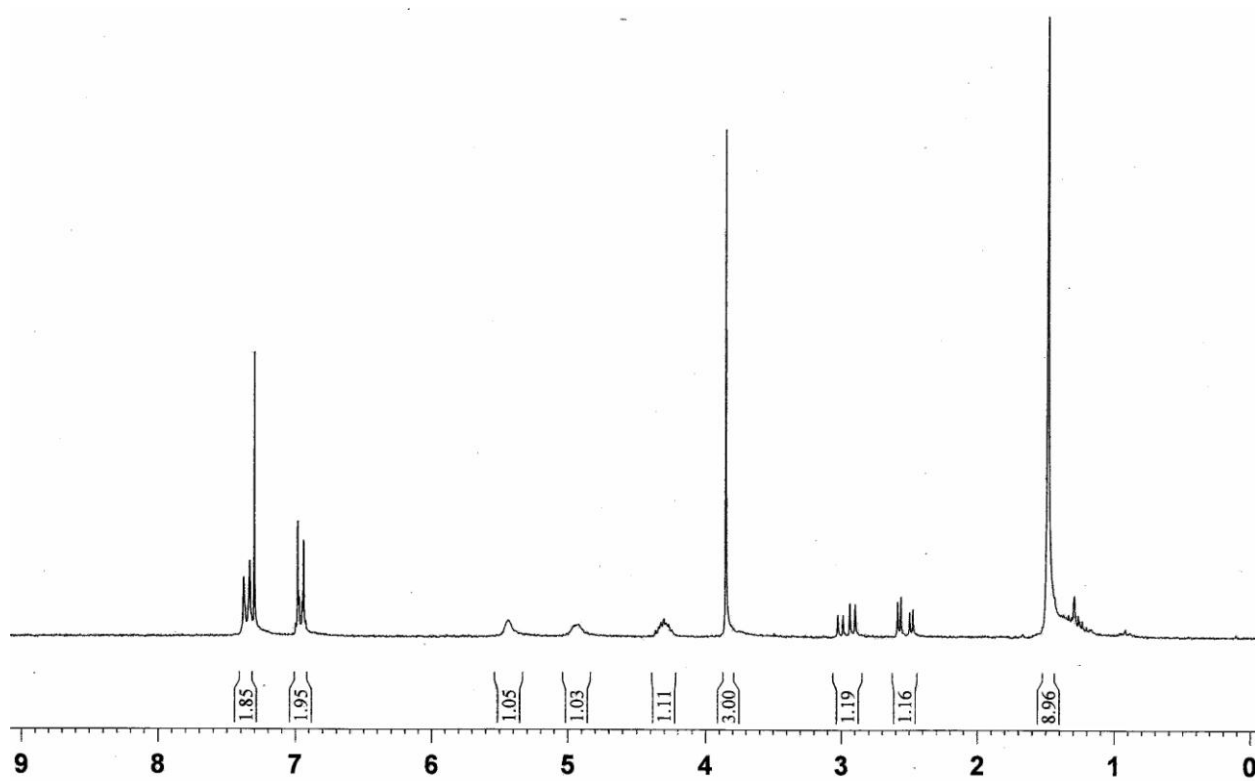

$^1\text{H}$  NMR of compound **15** (200 MHz,  $\text{CDCl}_3$ )

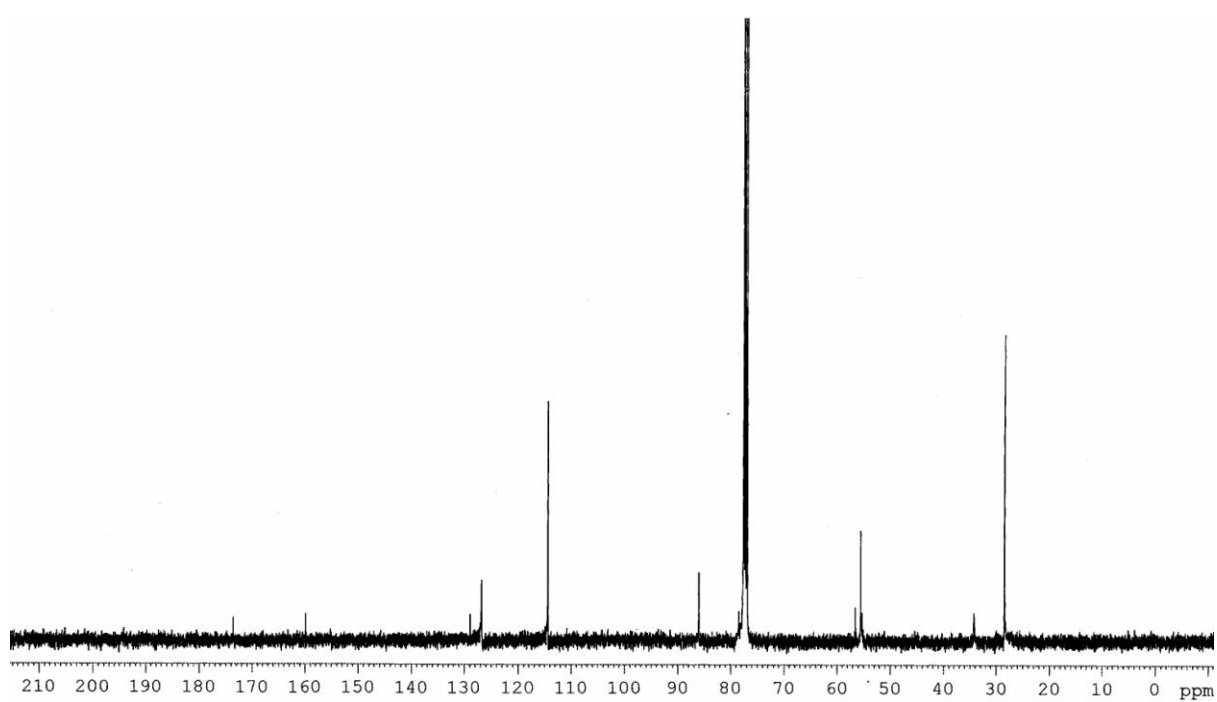

$^{13}\text{C}$  NMR of compound **15** (100 MHz,  $\text{CDCl}_3$ )

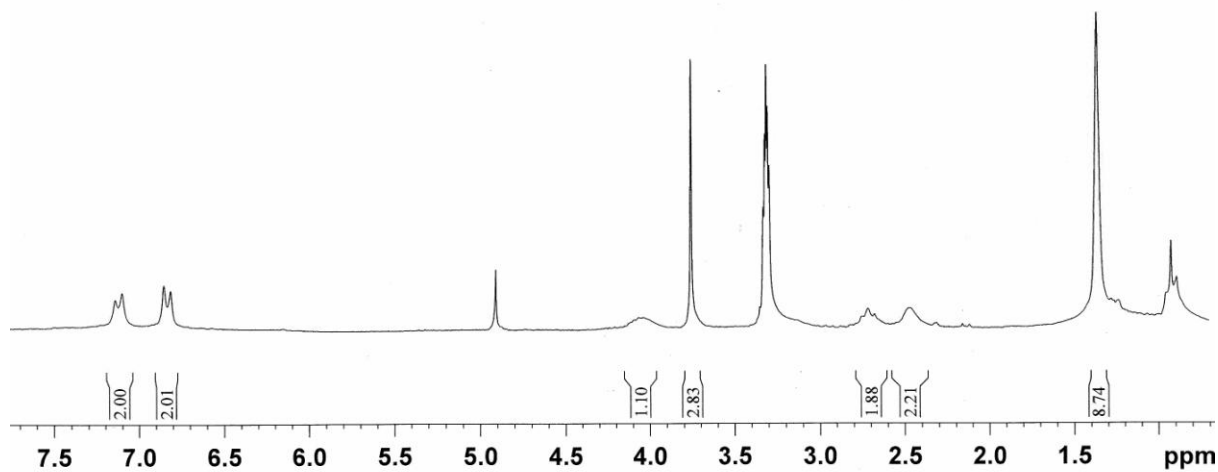

$^1\text{H}$  NMR of compound **16** (200 MHz,  $\text{CD}_3\text{OD}$ )

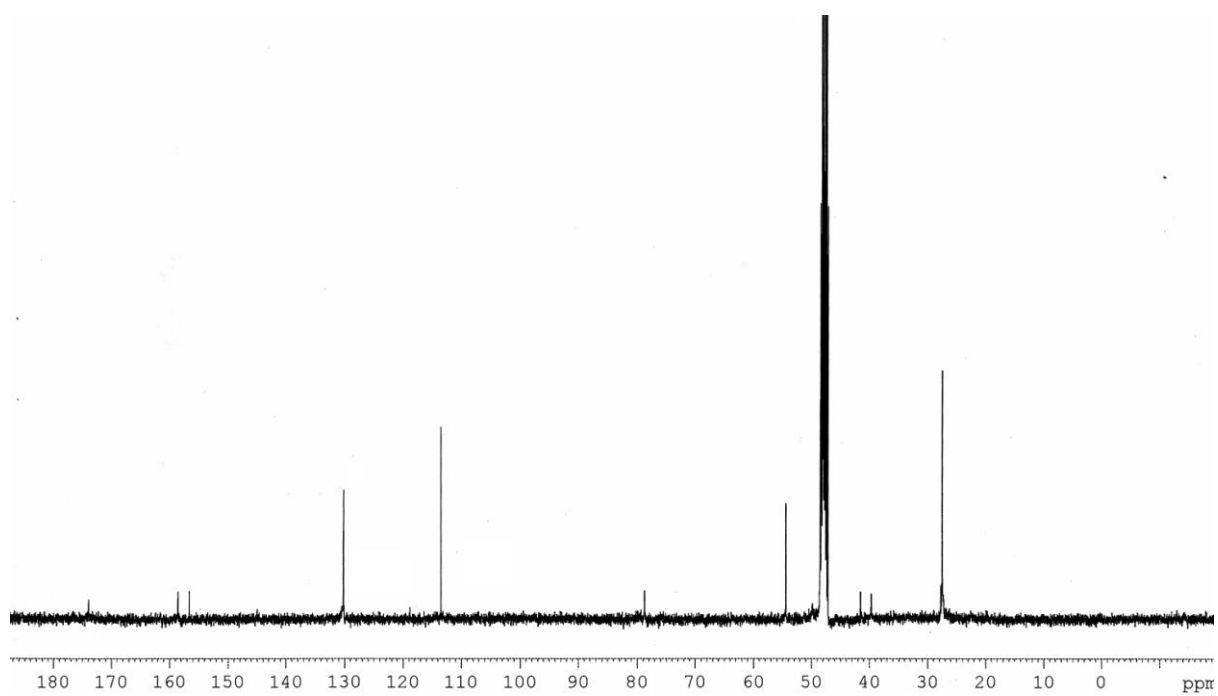

$^{13}\text{C}$  NMR of compound **16** (100 MHz,  $\text{CD}_3\text{OD}$ )

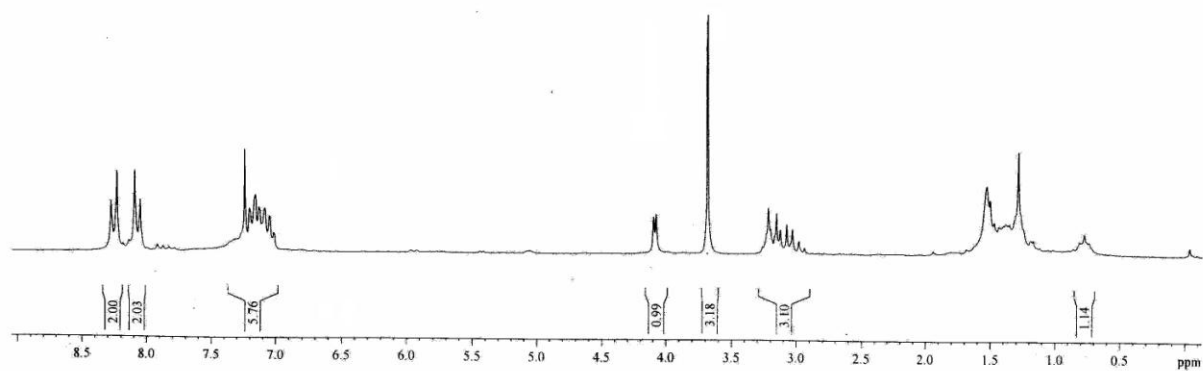

$^1\text{H}$  NMR of compound **2a'** (200 MHz,  $\text{CDCl}_3$ )

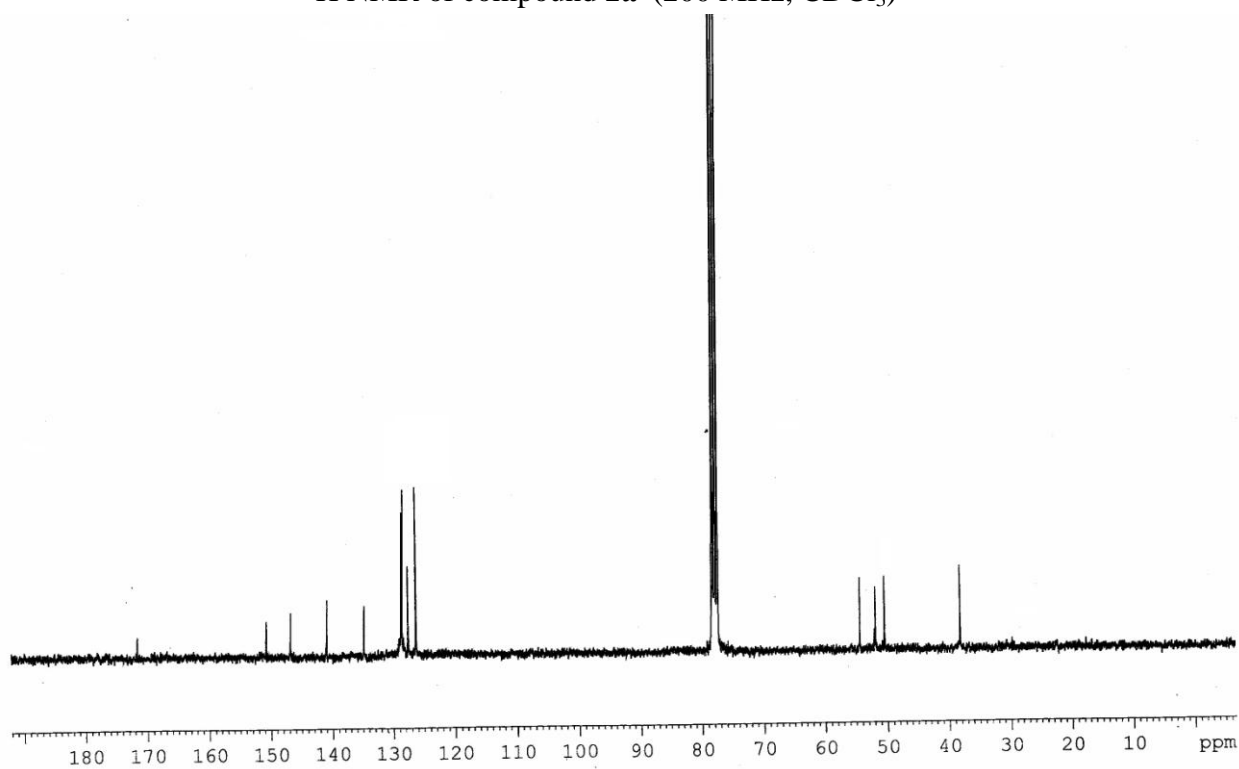

$^{13}\text{C}$  NMR of compound **2a'** (50 MHz,  $\text{CDCl}_3$ )

**K) 1D-nOe Spectra of compound 13a:**

AJ-SS-KGP-01-1H(SR) 500MHz.

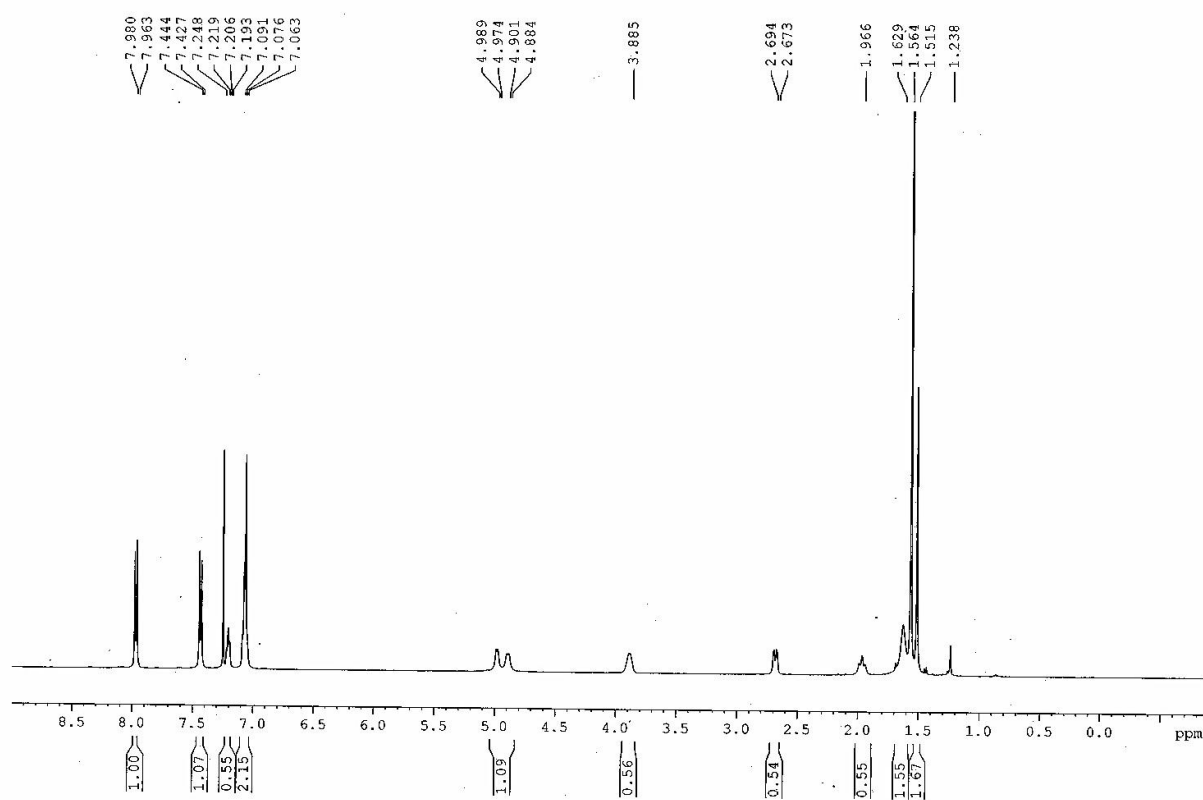

<sup>1</sup>H NMR of compound **13a** (500 MHz, CDCl<sub>3</sub>)

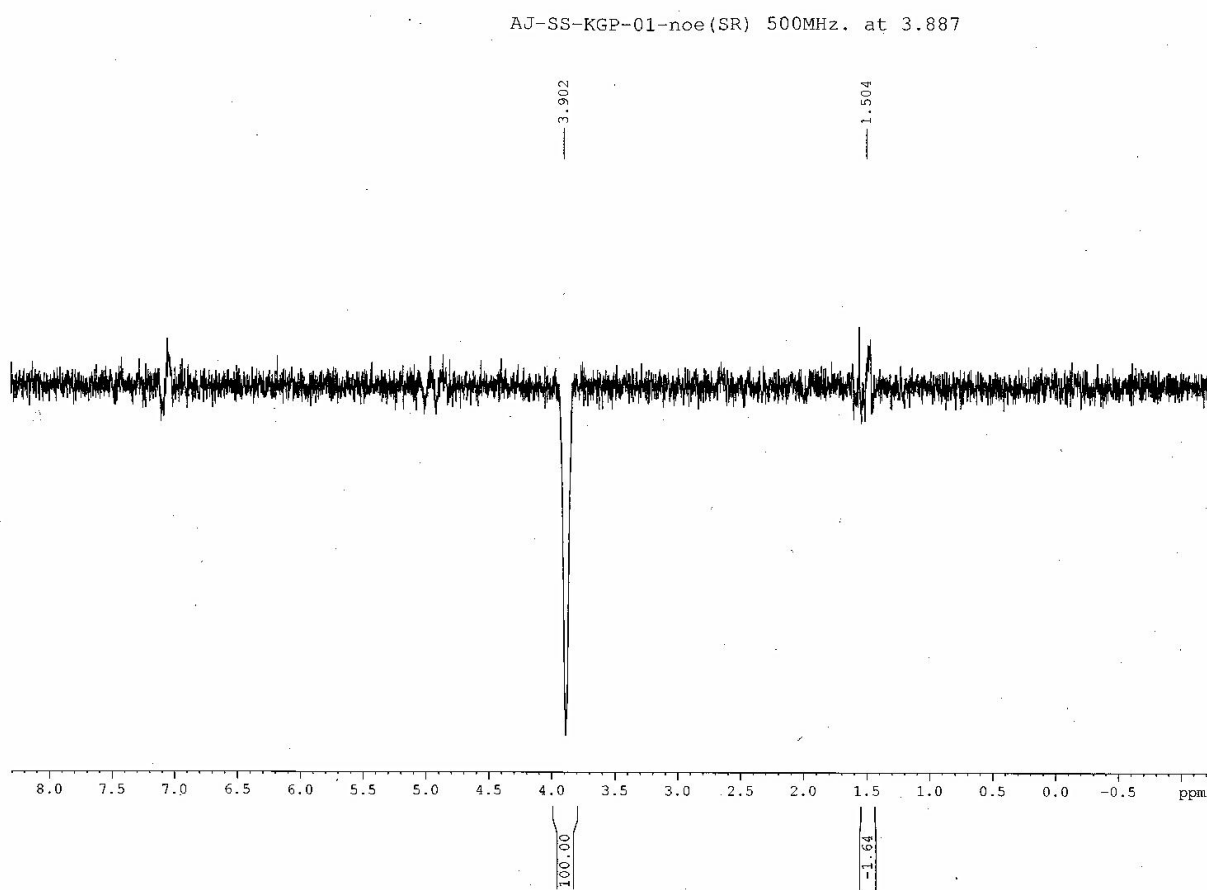

1D-nOe spectrum of compound **13a** (SR at 3.887ppm, 500 MHz, CDCl<sub>3</sub>)

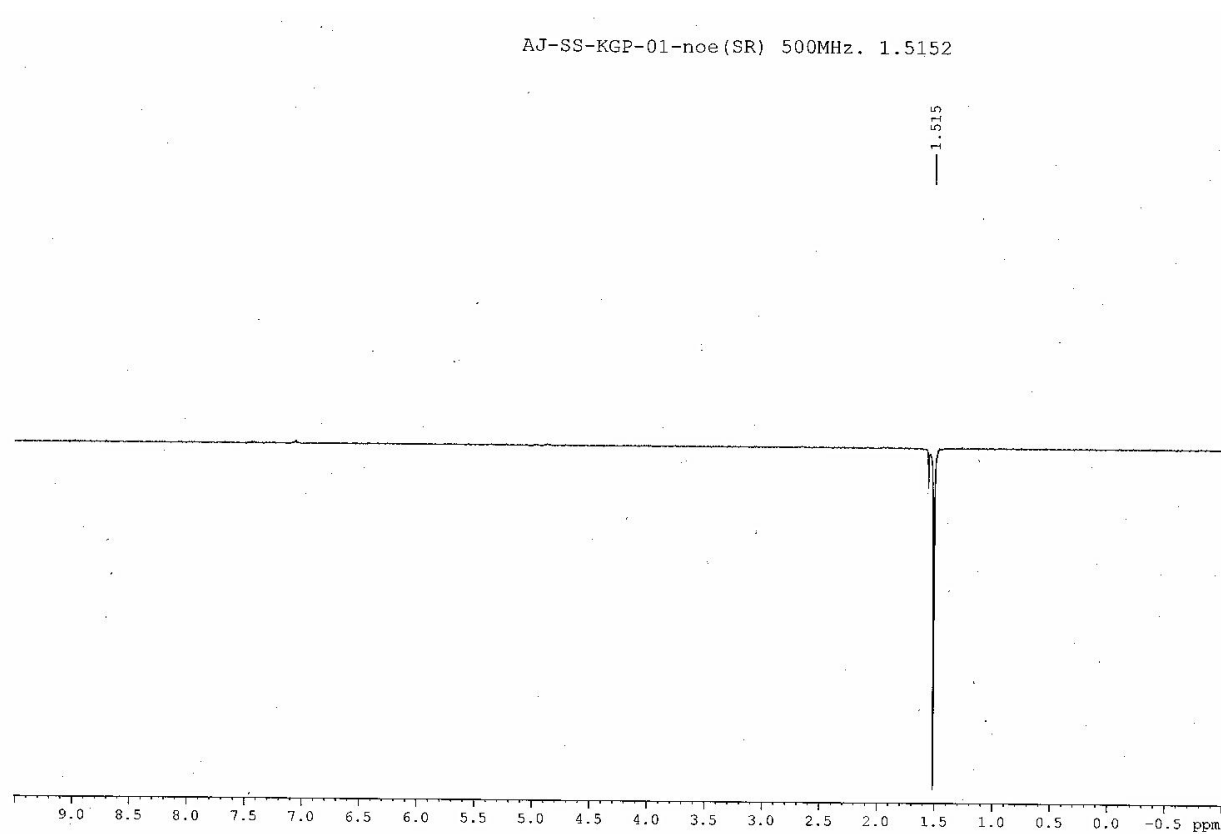

1D-nOe spectrum of compound **13a** (SR at 1.515ppm, 500 MHz, CDCl<sub>3</sub>)

# L) HPLC Chromatograms:

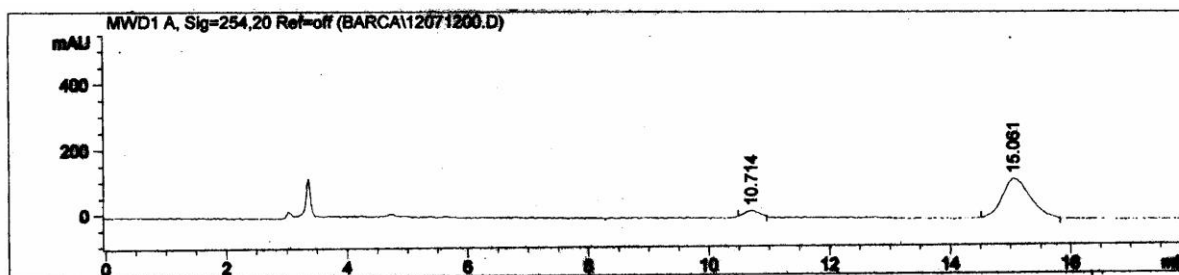

## Area Percent Report

Sorted By : Retention Time  
Multiplier : 1.0000  
Dilution : 1.0000  
Use Multiplier & Dilution Factor with ISTDs

Signal 1: MWD1 A, Sig=254,20 Ref=off

| Peak # | RetTime [min] | Sig | Type | Area [mAU*s] | Height [mAU] | Area %  |
|--------|---------------|-----|------|--------------|--------------|---------|
| 1      | 10.714        | 1   | MM   | 282.09979    | 18.41279     | 6.4074  |
| 2      | 15.061        | 1   | VV   | 4120.56789   | 125.41027    | 93.5926 |

Totals : 4402.66768 143.82306

Results obtained with enhanced integrator!

\*\*\* End of Report \*\*\*

HPLC Chromatogram of compound 3a

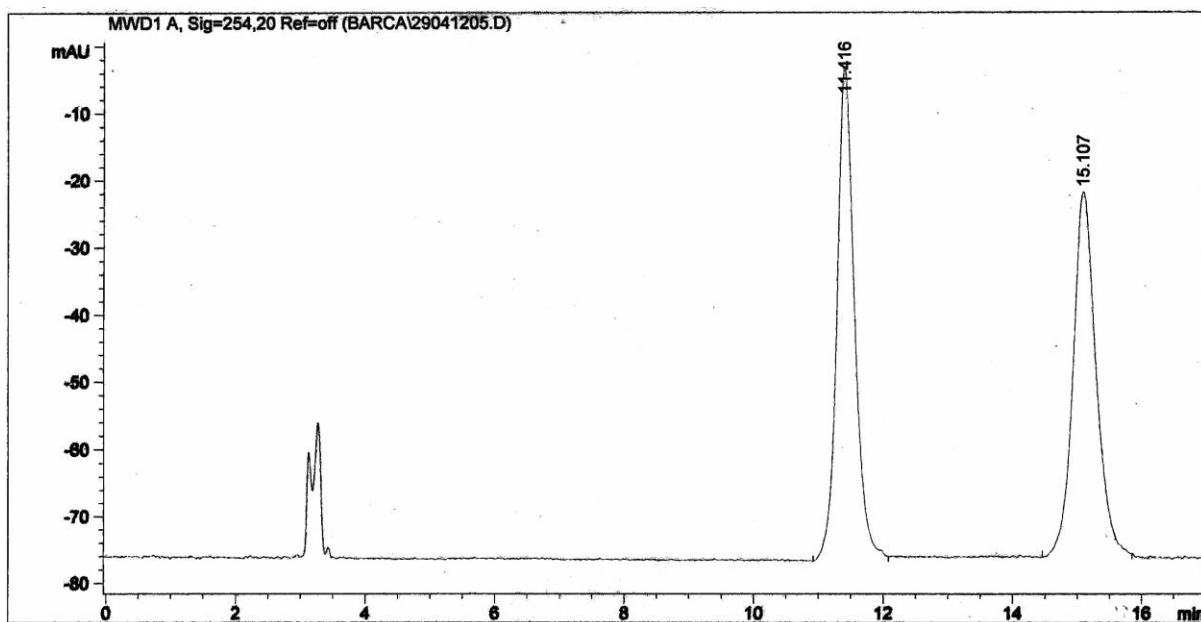

=====  
 Area Percent Report  
 =====

Sorted By : Retention Time  
 Multiplier : 1.0000  
 Dilution : 1.0000  
 Use Multiplier & Dilution Factor with ISTDs

Signal 1: MWD1 A, Sig=254,20 Ref=off

| Peak # | RetTime [min] | Sig | Type | Area [mAU*s] | Height [mAU] | Area %  |
|--------|---------------|-----|------|--------------|--------------|---------|
| 1      | 11.416        | 1   | VV   | 1442.76062   | 74.44961     | 49.8391 |
| 2      | 15.107        | 1   | VV   | 1452.07544   | 55.48281     | 50.1609 |

Totals : 2894.83606 129.93242

Results obtained with enhanced integrator!

=====  
 \*\*\* End of Report \*\*\*

HPLC Chromatogram of compound ( $\pm$ )3a

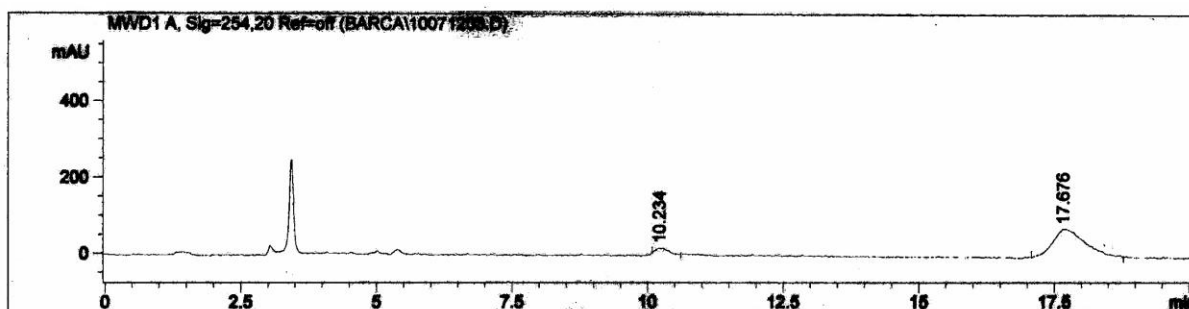

Area Percent Report

Sorted By : Retention Time  
Multiplier : 1.0000  
Dilution : 1.0000  
Use Multiplier & Dilution Factor with ISTDs

Signal 1: MWD1 A, Sig=254,20 Ref=off

| Peak # | RetTime [min] | Sig | Type | Area [mAU*s] | Height [mAU] | Area %  |
|--------|---------------|-----|------|--------------|--------------|---------|
| 1      | 10.234        | 1   | MM   | 242.78564    | 14.62041     | 7.0300  |
| 2      | 17.676        | 1   | MM   | 3210.79883   | 75.66816     | 92.9700 |

Totals : 3453.58447 90.28857

Results obtained with enhanced integrator!

\*\*\* End of Report \*\*\*

HPLC Chromatogram of compound 3c

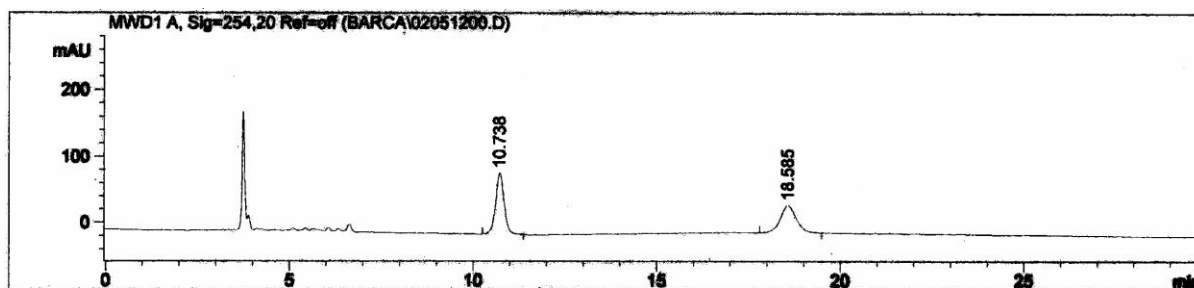

Area Percent Report

Sorted By : Retention Time  
Multiplier : 1.0000  
Dilution : 1.0000  
Use Multiplier & Dilution Factor with ISTDs

Signal 1: MWD1 A, Sig=254,20 Ref=off

| Peak # | RetTime [min] | Sig | Type | Area [mAU*s] | Height [mAU] | Area %  |
|--------|---------------|-----|------|--------------|--------------|---------|
| 1      | 10.738        | 1   | VV   | 1498.30383   | 92.93662     | 47.4891 |
| 2      | 18.585        | 1   | VV   | 1656.74182   | 45.53334     | 52.5109 |

Totals : 3155.04565 138.46996

Results obtained with enhanced integrator!

\*\*\* End of Report \*\*\*

# HPLC Chromatogram of compound ( $\pm$ )3c

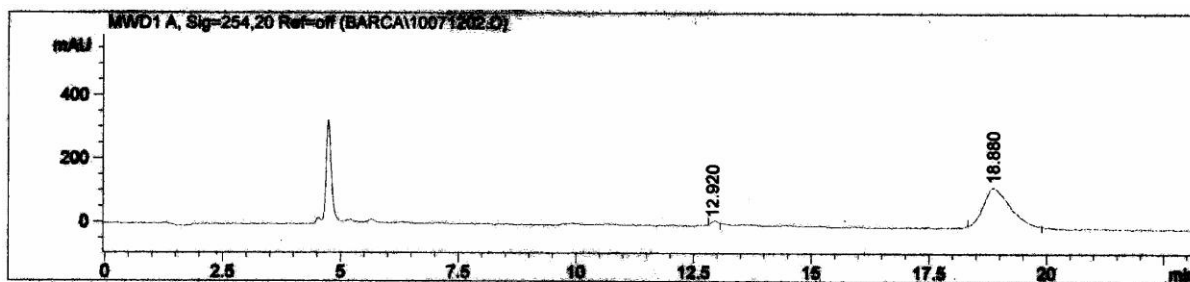

## Area Percent Report

Sorted By : Retention Time  
Multiplier : 1.0000  
Dilution : 1.0000  
Use Multiplier & Dilution Factor with ISTDs

Signal 1: MWD1 A, Sig=254,20 Ref=off

| Peak # | RetTime [min] | Sig | Type | Area [mAU*s] | Height [mAU] | Area %  |
|--------|---------------|-----|------|--------------|--------------|---------|
| 1      | 12.920        | 1   | VV   | 240.31197    | 18.04769     | 4.7548  |
| 2      | 18.880        | 1   | MM   | 4813.76807   | 122.32579    | 95.2452 |

Totals : 5054.08003 140.37348

Results obtained with enhanced integrator!

\*\*\* End of Report \*\*\*

## HPLC Chromatogram of compound 3b

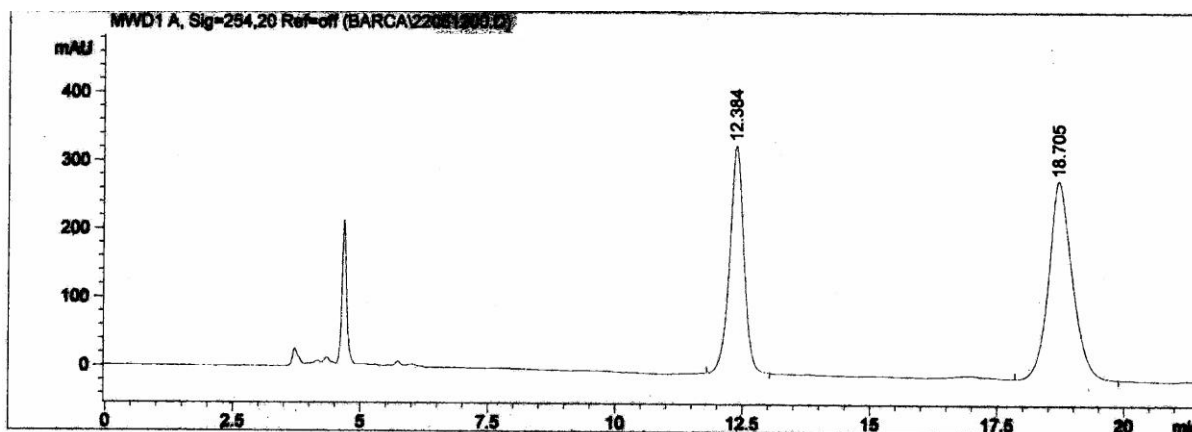

# Area Percent Report

Sorted By : Retention Time  
Multiplier : 1.0000  
Dilution : 1.0000  
Use Multiplier & Dilution Factor with ISTDs

Signal 1: MWD1 A, Sig=254.20 Ref=off

| Peak # | RetTime [min] | Sig | Type | Area [mAU*s] | Height [mAU] | Area %  |
|--------|---------------|-----|------|--------------|--------------|---------|
| 1      | 12.384        | 1   | VV   | 6660.51611   | 334.51300    | 41.2288 |
| 2      | 18.705        | 1   | VV   | 9494.48145   | 290.41406    | 58.7712 |

Totals : 1.61550e4 624.92706

Results obtained with enhanced integrator!

\*\*\* End of Report \*\*\*

HPLC Chromatogram of compound ( $\pm$ )3b

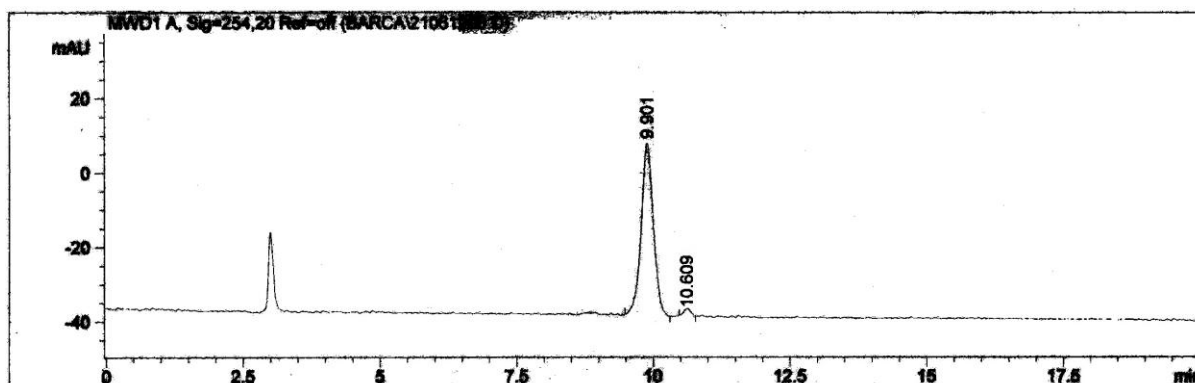

#### Area Percent Report

Sorted By : Retention Time  
Multiplier : 1.0000  
Dilution : 1.0000  
Use Multiplier & Dilution Factor with ISTDs

Signal 1: MWD1 A, Sig=254,20 Ref=off

| Peak # | RetTime [min] | Sig | Type | Area [mAU*s] | Height [mAU] | Area %  |
|--------|---------------|-----|------|--------------|--------------|---------|
| 1      | 9.901         | 1   | MM   | 720.01398    | 46.09703     | 96.7516 |
| 2      | 10.609        | 1   | MM   | 24.17415     | 2.05257      | 3.2484  |

Totals : 744.18813 48.14960

Results obtained with enhanced integrator!

\*\*\* End of Report \*\*\*

#### HPLC Chromatogram of compound 3d

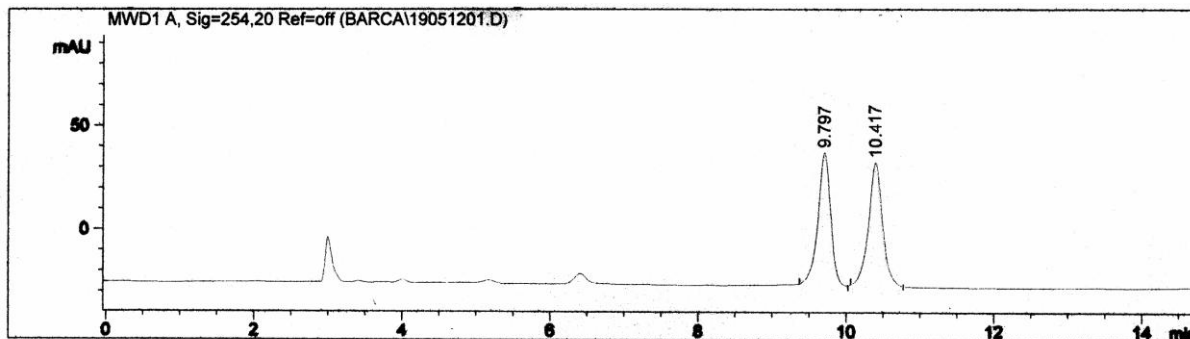

#### Area Percent Report

Sorted By : Retention Time  
Multiplier : 1.0000  
Dilution : 1.0000  
Use Multiplier & Dilution Factor with ISTDs

Signal 1: MWD1 A, Sig=254,20 Ref=off

| Peak # | RetTime [min] | Sig | Type | Area [mAU*s] | Height [mAU] | Area %  |
|--------|---------------|-----|------|--------------|--------------|---------|
| 1      | 9.797         | 1   | VV   | 824.98761    | 64.97095     | 50.9241 |
| 2      | 10.417        | 1   | VV   | 795.04614    | 60.24365     | 49.0759 |

Totals : 1620.03375 125.21460

Results obtained with enhanced integrator!

\*\*\* End of Report \*\*\*

# HPLC Chromatogram of compound ( $\pm$ )3d

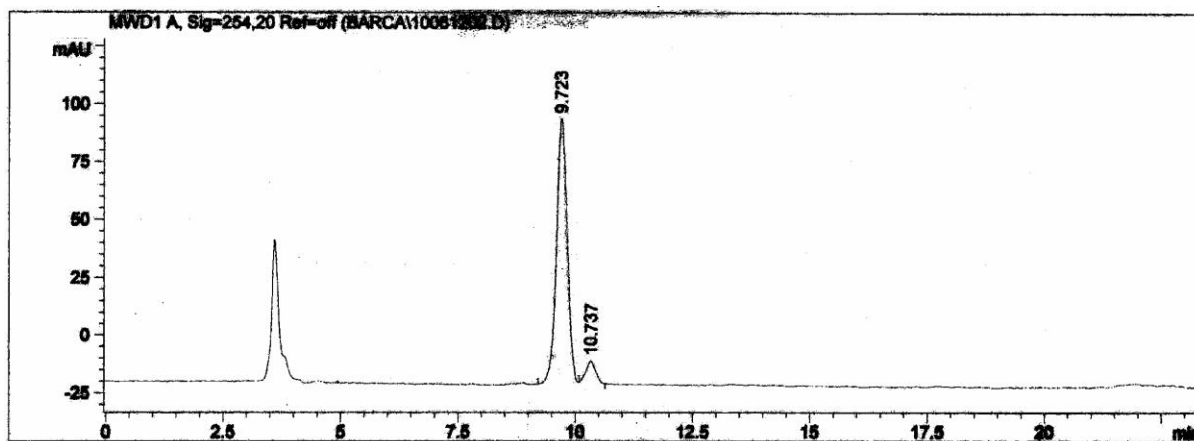

## Area Percent Report

Sorted By : Retention Time  
Multiplier : 1.0000  
Dilution : 1.0000  
Use Multiplier & Dilution Factor with ISTDs

Signal 1: MWD1 A, Sig=254,20 Ref=off

| Peak # | RetTime [min] | Sig | Type | Area [mAU*s] | Height [mAU] | Area %  |
|--------|---------------|-----|------|--------------|--------------|---------|
| 1      | 9.723         | 1   | VV   | 1983.58276   | 116.76035    | 90.1504 |
| 2      | 10.737        | 1   | VV   | 216.72014    | 12.00198     | 9.8496  |

Totals : 2200.30290 128.76232

Results obtained with enhanced integrator!

\*\*\* End of Report \*\*\*

HPLC Chromatogram of compound 3e

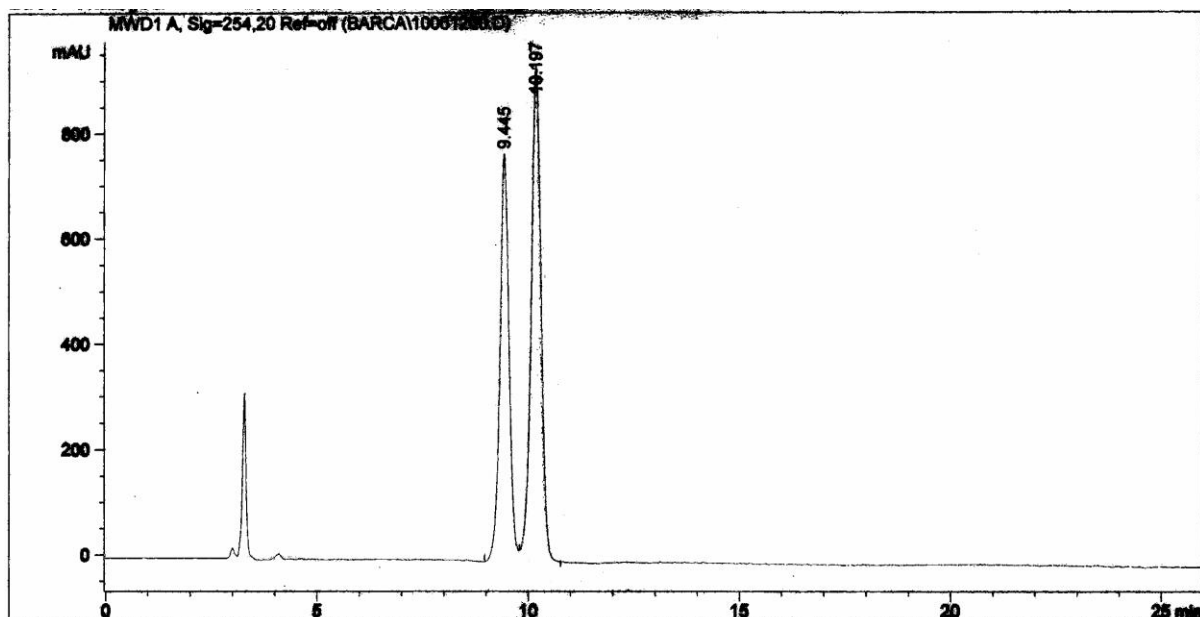

# Area Percent Report

Sorted By : Retention Time  
Multiplier : 1.0000  
Dilution : 1.0000  
Use Multiplier & Dilution Factor with ISTDs

Signal 1: MWD1 A, Sig=254,20 Ref=off

| Peak # | RetTime [min] | Sig | Type | Area [mAU*s] | Height [mAU] | Area %  |
|--------|---------------|-----|------|--------------|--------------|---------|
| 1      | 9.445         | 1   | VV   | 1.19668e4    | 779.79865    | 43.1531 |
| 2      | 10.197        | 1   | VV   | 1.57642e4    | 944.80670    | 56.8469 |

Totals : 2.77309e4 1724.60535

Results obtained with enhanced integrator!

\*\*\* End of Report \*\*\*

HPLC Chromatogram of compound ( $\pm$ )3e

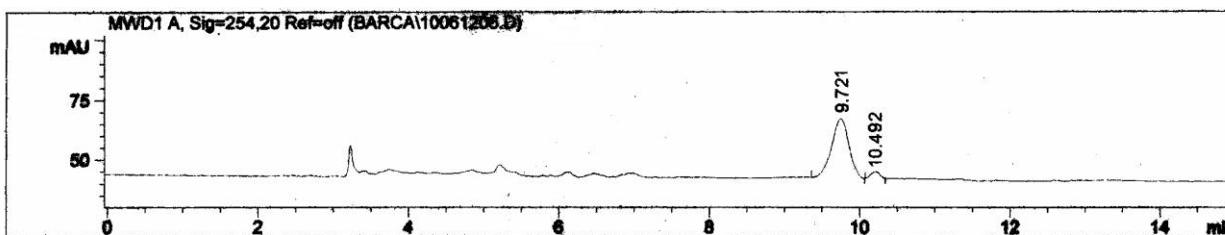

# Area Percent Report

Sorted By : Retention Time  
Multiplier : 1.0000  
Dilution : 1.0000  
Use Multiplier & Dilution Factor with ISTDs

Signal 1: MWD1 A, Sig=254,20 Ref=off

| Peak # | RetTime [min] | Sig | Type | Area [mAU*s] | Height [mAU] | Area %  |
|--------|---------------|-----|------|--------------|--------------|---------|
| 1      | 9.721         | 1   | MM   | 191.72936    | 22.90052     | 90.9924 |
| 2      | 10.492        | 1   | MM   | 18.97967     | 2.65805      | 9.0075  |

Totals : 210.70903 25.58857

Results obtained with enhanced integrator!

\*\*\* End of Report \*\*\*

HPLC Chromatogram of compound 3f

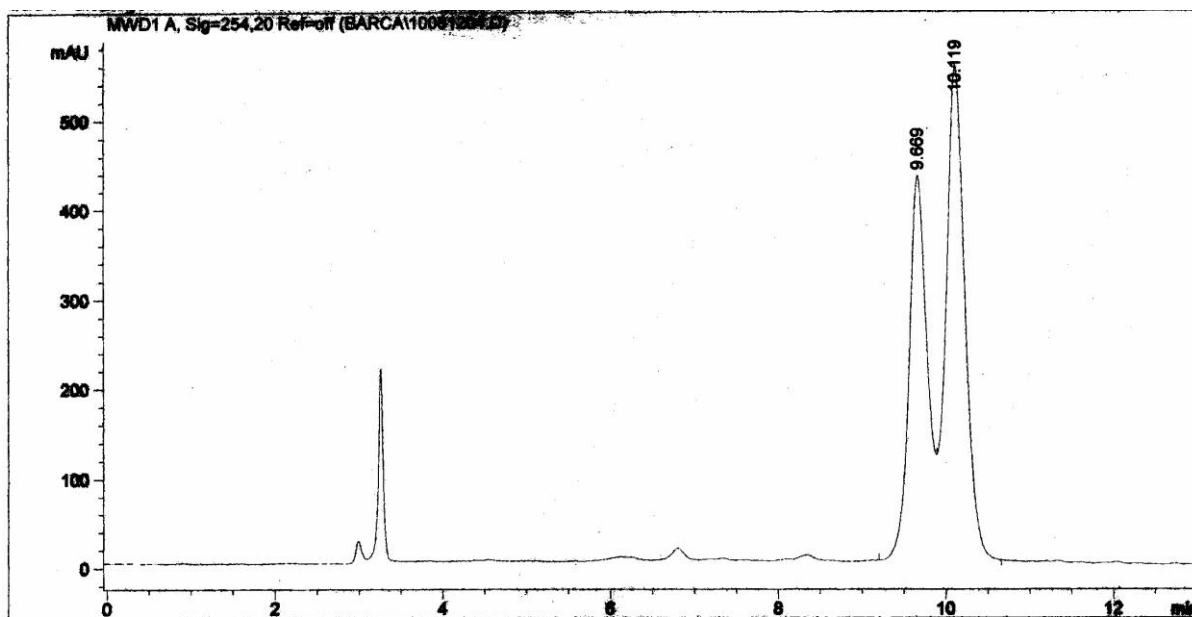

# Area Percent Report

Sorted By : Retention Time  
Multiplier : 1.0000  
Dilution : 1.0000  
Use Multiplier & Dilution Factor with ISTDs

Signal 1: MWD1 A, Sig=254,20 Ref=off

| Peak # | RetTime [min] | Sig | Type | Area [mAU*s] | Height [mAU] | Area %  |
|--------|---------------|-----|------|--------------|--------------|---------|
| 1      | 9.669         | 1   | VV   | 6619.65039   | 433.60724    | 42.6584 |
| 2      | 10.119        | 1   | VV   | 8898.15332   | 556.32684    | 57.3416 |

Totals : 1.55178e4 989.93408

Results obtained with enhanced integrator!

\*\*\* End of Report \*\*\*

HPLC Chromatogram of compound ( $\pm$ )3f

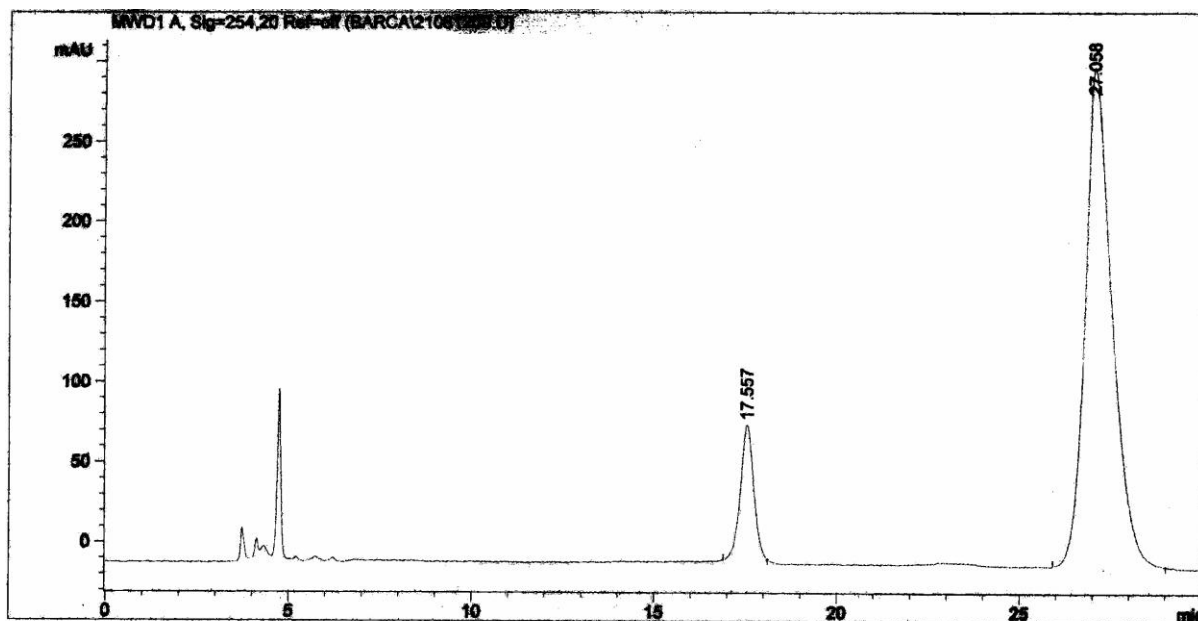

# Area Percent Report

Sorted By : Retention Time  
Multiplier : 1.0000  
Dilution : 1.0000  
Use Multiplier & Dilution Factor with ISTDs

Signal 1: MWD1 A, Sig=254,20 Ref=off

| Peak # | RetTime [min] | Sig | Type | Area [mAU*s] | Height [mAU] | Area %  |
|--------|---------------|-----|------|--------------|--------------|---------|
| 1      | 17.557        | 1   | MM   | 2116.89868   | 83.06984     | 11.6862 |
| 2      | 27.058        | 1   | MM   | 1.59977e4    | 311.09402    | 88.3138 |

Totals : 1.81146e4 394.16386

Results obtained with enhanced integrator!

\*\*\* End of Report \*\*\*

HPLC Chromatogram of compound 3g

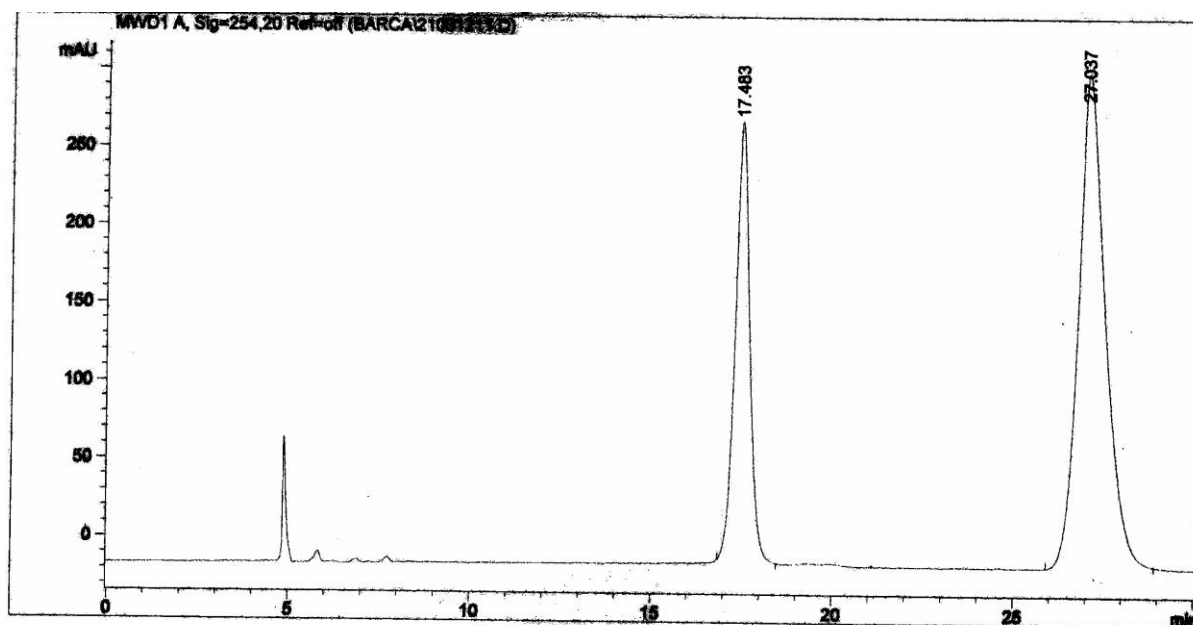

# Area Percent Report

Sorted By : Retention Time  
Multiplier : 1.0000  
Dilution : 1.0000  
Use Multiplier & Dilution Factor with ISTDs

Signal 1: MWD1 A, Sig=254,20 Ref-off

| Peak # | RetTime [min] | Sig | Type | Area [mAU*s] | Height [mAU] | Area %  |
|--------|---------------|-----|------|--------------|--------------|---------|
| 1      | 17.483        | 1   | VV   | 8570.39160   | 286.79462    | 33.5899 |
| 2      | 27.037        | 1   | VV   | 1.69444e4    | 319.12619    | 66.4101 |

Totals : 2.55148e4 605.92081

Results obtained with enhanced integrator!

\*\*\* End of Report \*\*\*

HPLC Chromatogram of compound ( $\pm$ )3g

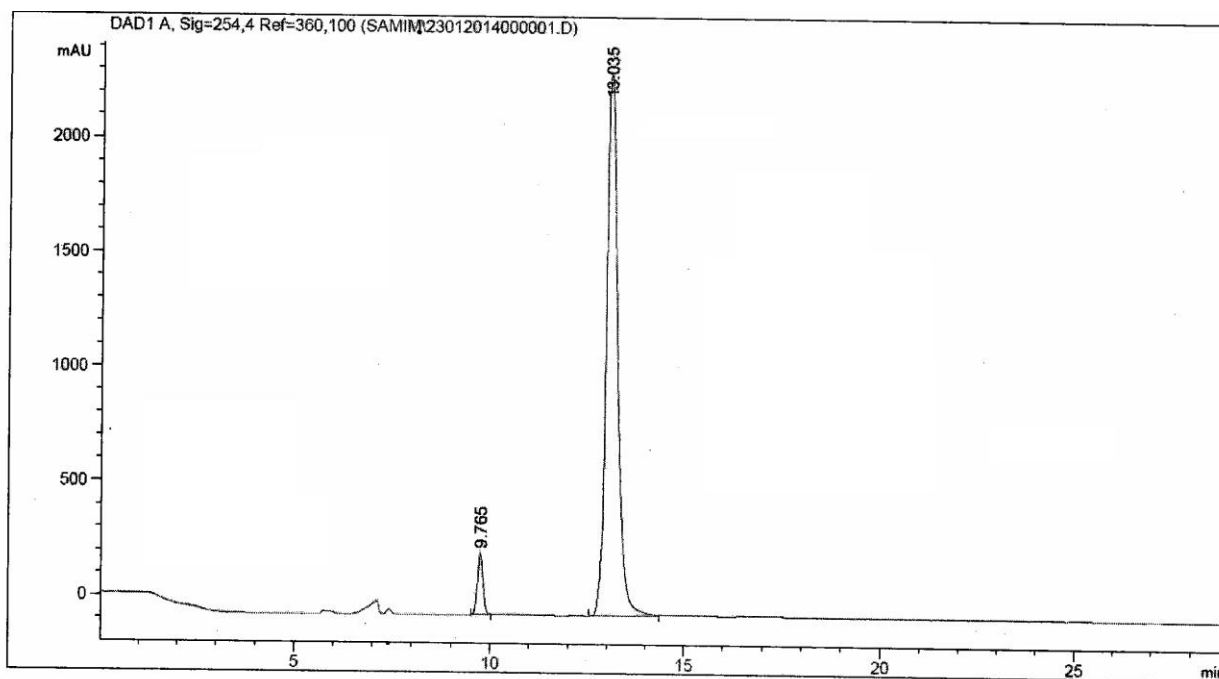

=====  
 Area Percent Report  
 =====

Sorted By : Signal  
 Multiplier : 1.0000  
 Dilution : 1.0000  
 Use Multiplier & Dilution Factor with ISTDs

Signal 1: DAD1 A, Sig=254,4 Ref=360,100

| Peak # | RetTime [min] | Type | Width [min] | Area [mAU*s] | Height [mAU] | Area %  |
|--------|---------------|------|-------------|--------------|--------------|---------|
| 1      | 9.765         | BV   | 0.1682      | 3046.68896   | 281.54407    | 6.0274  |
| 2      | 13.035        | VB   | 0.3041      | 4.75003e4    | 2367.10376   | 93.9726 |

Totals : 5.05470e4 2648.64783

HPLC Chromatogram of compound **3h**

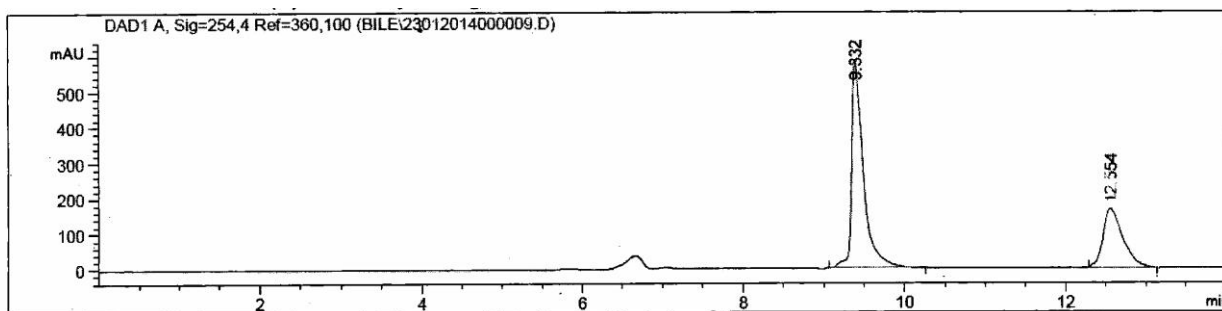

=====  
 Area Percent Report  
 =====

Sorted By : Signal  
 Multiplier : 1.0000  
 Dilution : 1.0000  
 Use Multiplier & Dilution Factor with ISTDs

Signal 1: DAD1 A, Sig=254,4 Ref=360,100

| Peak # | RetTime [min] | Type | Width [min] | Area [mAU*s] | Height [mAU] | Area %  |
|--------|---------------|------|-------------|--------------|--------------|---------|
| 1      | 9.332         | BV   | 0.1083      | 4347.11523   | 574.42169    | 59.6755 |
| 2      | 12.554        | VV   | 0.2438      | 2937.47778   | 166.49480    | 40.3245 |

Totals : 7284.59302 740.91649

=====  
 \*\*\* End of Report \*\*\*

HPLC Chromatogram of compound ( $\pm$ )**3h**

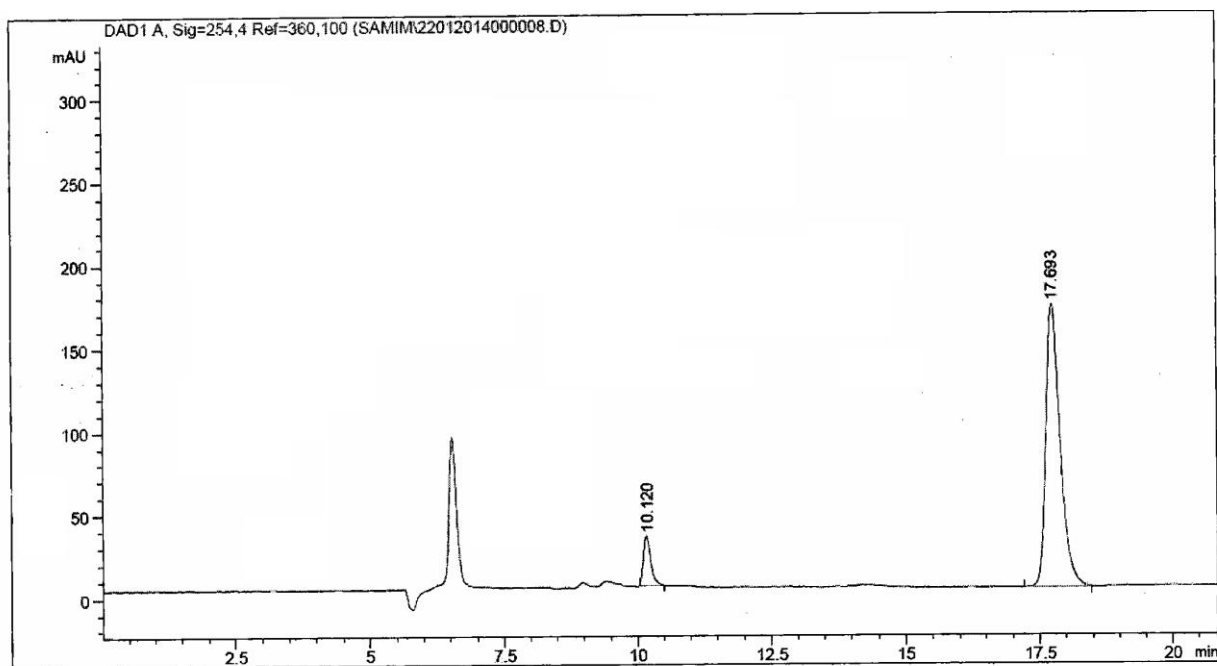

=====  
Area Percent Report  
=====

Sorted By : Signal  
Multiplier : 1.0000  
Dilution : 1.0000  
Use Multiplier & Dilution Factor with ISTDs

Signal 1: DAD1 A, Sig=254,4 Ref=360,100

| Peak # | RetTime [min] | Type | Width [min] | Area [mAU*s] | Height [mAU] | Area %  |
|--------|---------------|------|-------------|--------------|--------------|---------|
| 1      | 10.120        | BB   | 0.1358      | 229.20276    | 28.13960     | 7.4924  |
| 2      | 17.693        | VB   | 0.2547      | 2829.93335   | 169.59680    | 92.5076 |

Totals : 3059.13611 197.73640

HPLC Chromatogram of compound **3i**

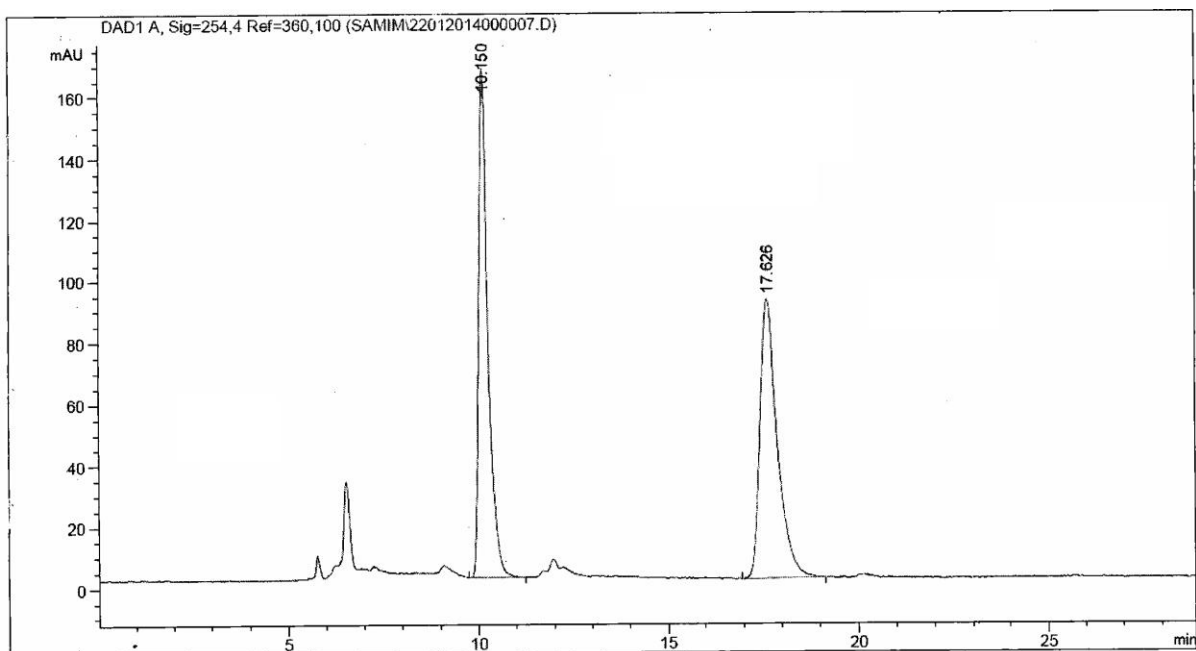

=====  
 Area Percent Report  
 =====

Sorted By : Signal  
 Multiplier : 1.0000  
 Dilution : 1.0000  
 Use Multiplier & Dilution Factor with ISTDs.

Signal 1: DAD1 A, Sig=254,4 Ref=360,100

| Peak # | RetTime [min] | Type | Width [min] | Area [mAU*s] | Height [mAU] | Area %  |
|--------|---------------|------|-------------|--------------|--------------|---------|
| 1      | 10.150        | BB   | 0.1810      | 2027.92419   | 165.44620    | 49.6382 |
| 2      | 17.626        | BB   | 0.3341      | 2057.48682   | 90.88344     | 50.3618 |

Totals : 4085.41101 256.32964

HPLC Chromatogram of compound ( $\pm$ )**3i**

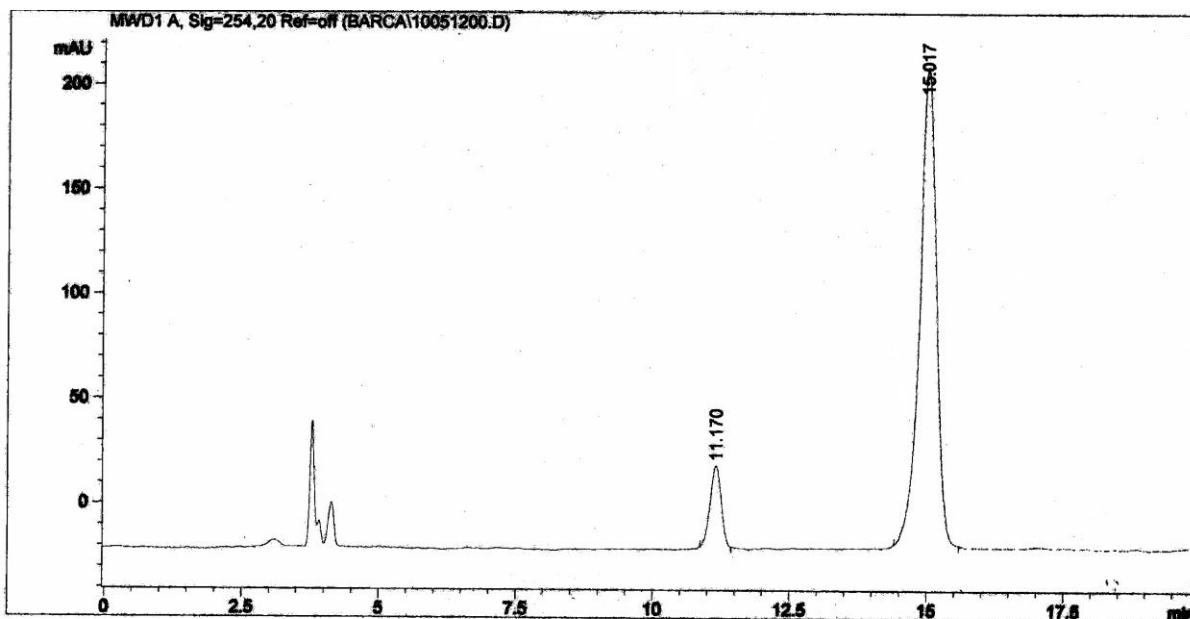

# Area Percent Report

Sorted By : Retention Time  
Multiplier : 1.0000  
Dilution : 1.0000  
Use Multiplier & Dilution Factor with ISTDs

Signal 1: MWD1 A, Sig=254,20 Ref=off

| Peak # | RetTime [min] | Sig | Type | Area [mAU*s] | Height [mAU] | Area %  |
|--------|---------------|-----|------|--------------|--------------|---------|
| 1      | 11.170        | 1   | MM   | 543.48041    | 38.81512     | 10.5462 |
| 2      | 15.017        | 1   | MM   | 4609.83594   | 217.10495    | 89.4538 |

Totals : 5153.31635 255.92007

Results obtained with enhanced integrator!

\*\*\* End of Report \*\*\*

HPLC Chromatogram of compound 10

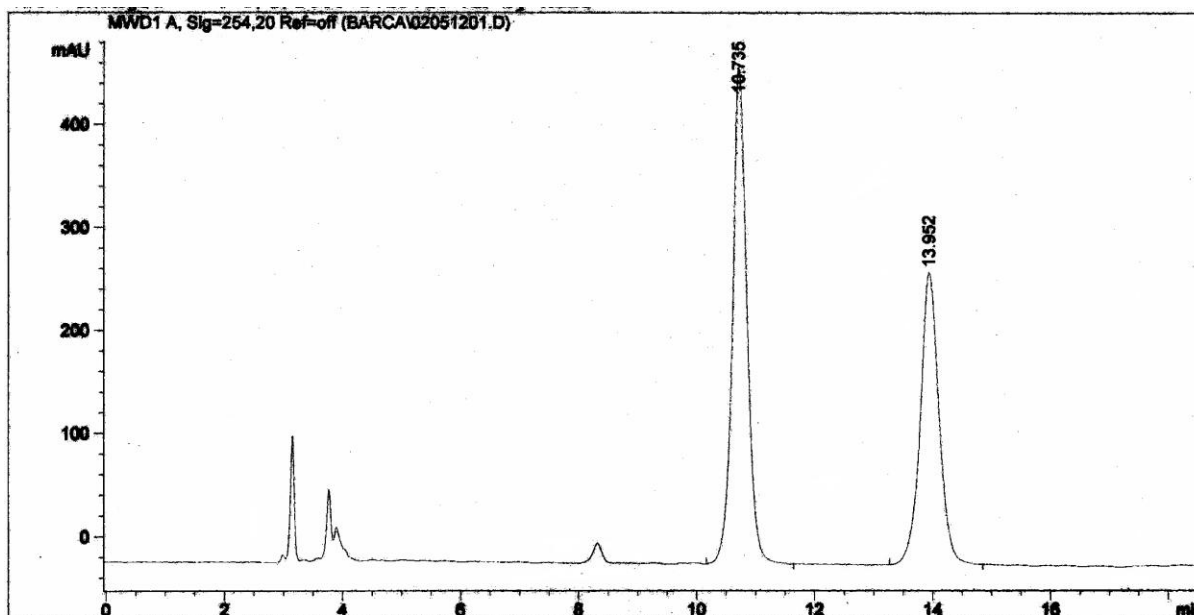

# Area Percent Report

Sorted By : Retention Time  
Multiplier : 1.0000  
Dilution : 1.0000  
Use Multiplier & Dilution Factor with ISTDs

Signal 1: MWD1 A, Sig=254,20 Ref=off

| Peak # | RetTime [min] | Sig | Type | Area [mAU*s] | Height [mAU] | Area %  |
|--------|---------------|-----|------|--------------|--------------|---------|
| 1      | 10.735        | 1   | VV   | 8307.18359   | 484.42422    | 56.5664 |
| 2      | 13.952        | 1   | VV   | 6378.54688   | 285.07300    | 43.4336 |

Totals : 1.46857e4 769.49722

Results obtained with enhanced integrator!

\*\*\* End of Report \*\*\*

HPLC Chromatogram of compound ( $\pm$ )10

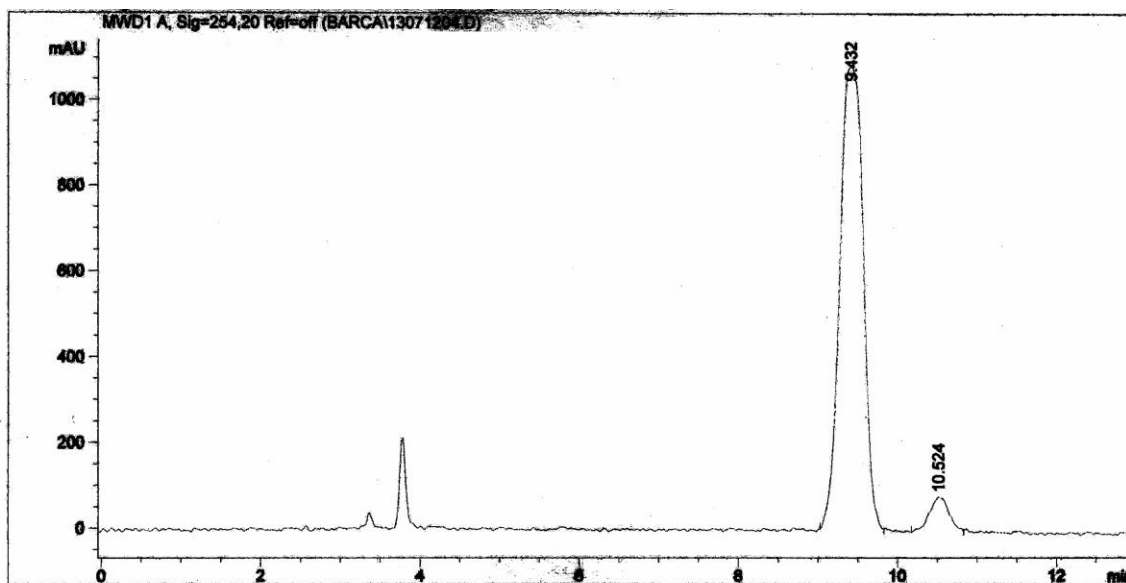

# Area Percent Report

Sorted By : Retention Time  
Multiplier : 1.0000  
Dilution : 1.0000  
Use Multiplier & Dilution Factor with ISTDs

Signal 1: MWD1 A, Sig=254,20 Ref=off

| Peak # | RetTime [min] | Sig | Type | Area [mAU*s] | Height [mAU] | Area %  |
|--------|---------------|-----|------|--------------|--------------|---------|
| 1      | 9.432         | 1   | VV   | 2.26739e4    | 1098.60828   | 94.5226 |
| 2      | 10.524        | 1   | MM   | 1313.91406   | 78.54959     | 5.4774  |

Totals : 2.39879e4 1177.15787

Results obtained with enhanced integrator!

\*\*\* End of Report \*\*\*

HPLC Chromatogram of compound 7a

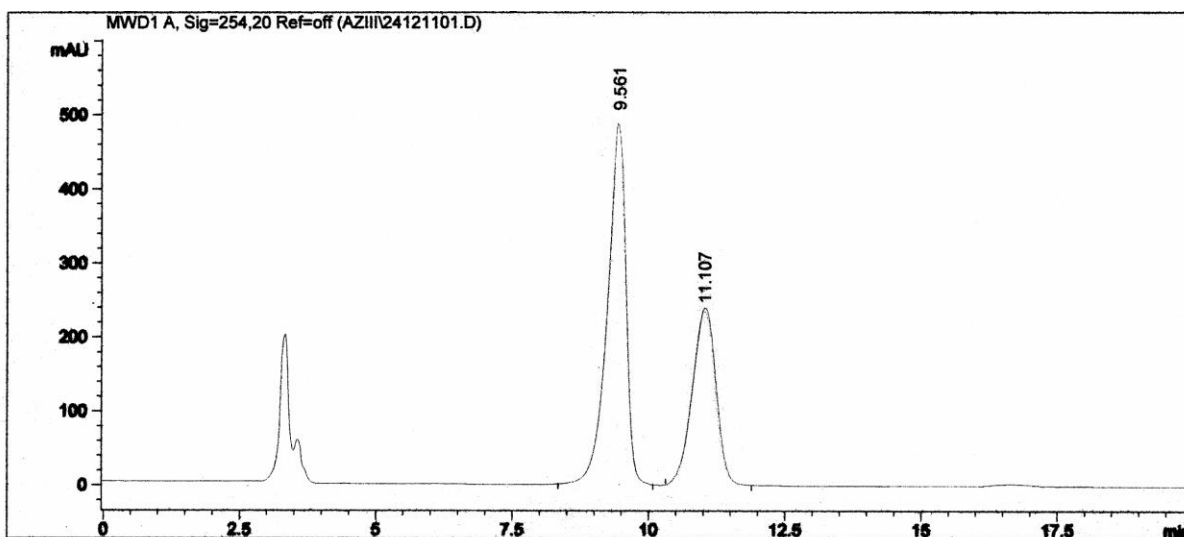

# Area Percent Report

Sorted By : Retention Time  
Multiplier : 1.0000  
Dilution : 1.0000  
Use Multiplier & Dilution Factor with ISTDs

Signal 1: MWD1 A, Sig=254,20 Ref=off

| Peak # | RetTime [min] | Sig | Type | Area [mAU*s] | Height [mAU] | Area %  |
|--------|---------------|-----|------|--------------|--------------|---------|
| 1      | 9.561         | 1   | VB   | 8020.86475   | 502.02359    | 52.4920 |
| 2      | 11.107        | 1   | BB   | 7259.31006   | 239.78349    | 47.5080 |

Totals : 1.52802e4 741.80708

Results obtained with enhanced integrator!

\*\*\* End of Report \*\*\*

HPLC Chromatogram of compound ( $\pm$ )7a

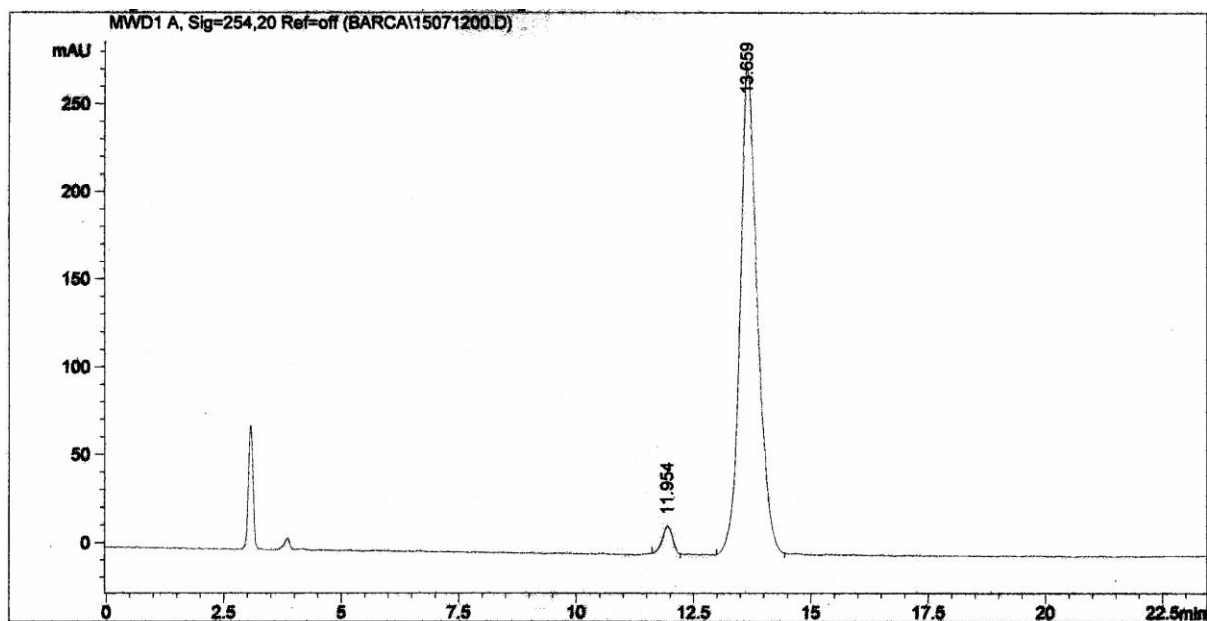

# Area Percent Report

Sorted By : Retention Time  
Multiplier : 1.0000  
Dilution : 1.0000  
Use Multiplier & Dilution Factor with ISTDs

Signal 1: MWD1 A, Sig=254,20 Ref=off

| Peak # | RetTime [min] | Sig | Type | Area [mAU*s] | Height [mAU] | Area %  |
|--------|---------------|-----|------|--------------|--------------|---------|
| 1      | 11.954        | 1   | MM   | 283.34760    | 17.60246     | 3.8428  |
| 2      | 13.659        | 1   | MM   | 7090.10010   | 277.23441    | 96.1572 |

Totals : 7373.44769 294.83687

Results obtained with enhanced integrator!

\*\*\* End of Report \*\*\*

HPLC Chromatogram of compound **7b**

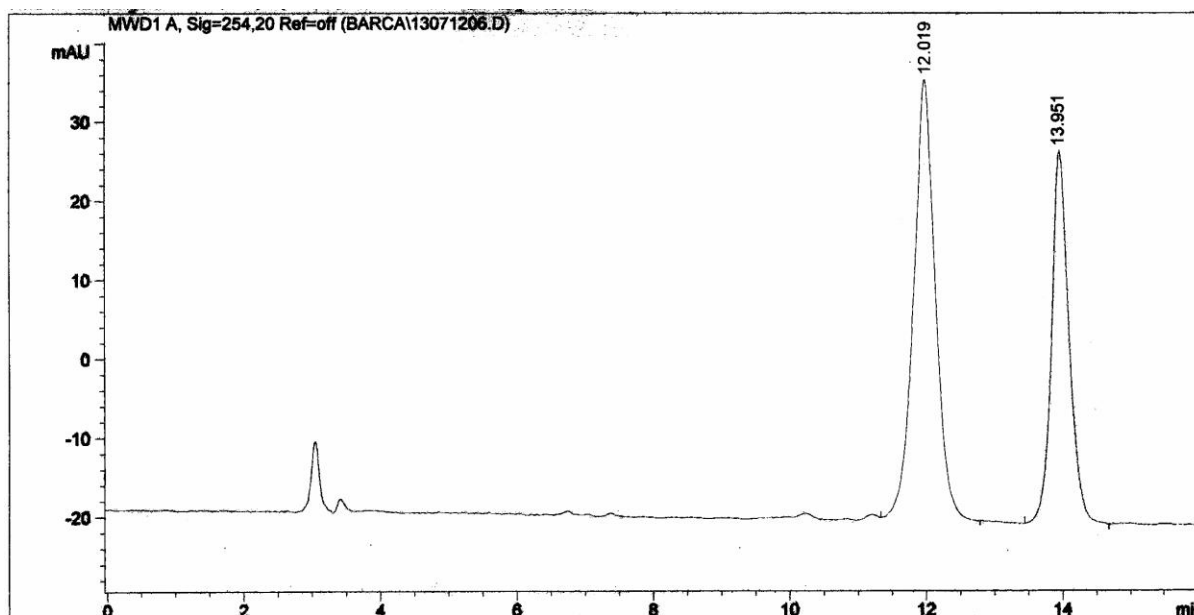

# Area Percent Report

Sorted By : Retention Time  
Multiplier : 1.0000  
Dilution : 1.0000  
Use Multiplier & Dilution Factor with ISTDs

Signal 1: MWD1 A, Sig=254,20 Ref=off

| Peak # | RetTime [min] | Sig | Type | Area [mAU*s] | Height [mAU] | Area %  |
|--------|---------------|-----|------|--------------|--------------|---------|
| 1      | 12.019        | 1   | MM   | 1301.30493   | 57.30381     | 54.2451 |
| 2      | 13.951        | 1   | MM   | 1097.62903   | 46.19674     | 45.7549 |

Totals : 2398.93396 103.50055

Results obtained with enhanced integrator!

\*\*\* End of Report \*\*\*

HPLC Chromatogram of compound ( $\pm$ )7b

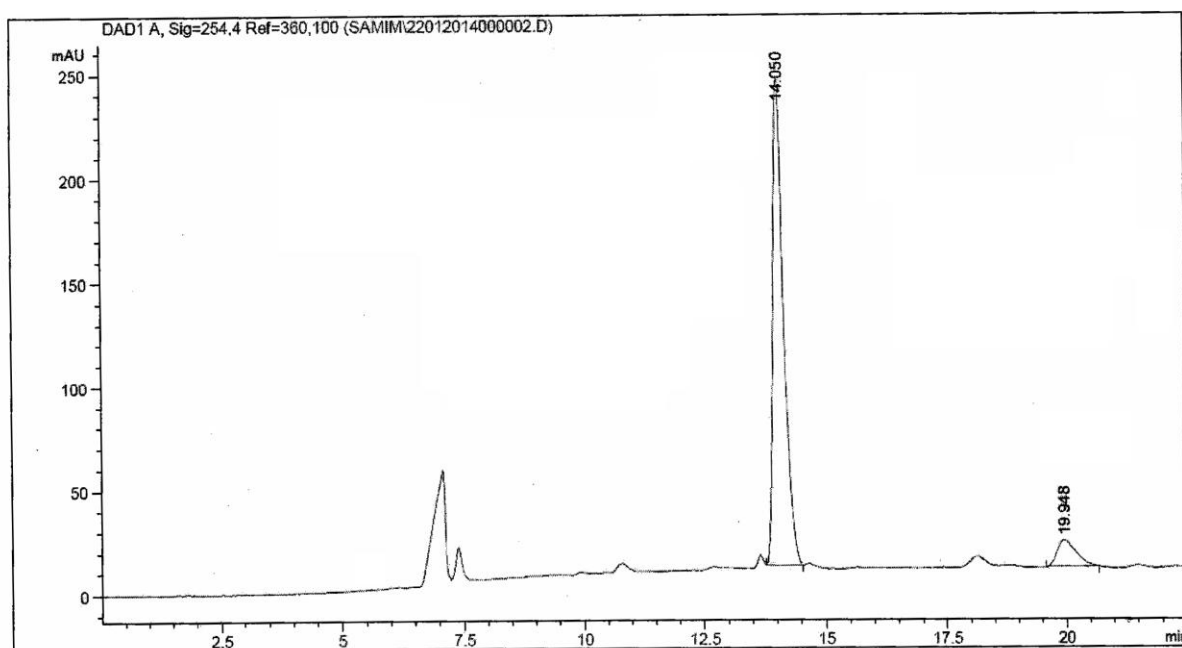

=====  
 Area Percent Report  
 =====

Sorted By : Signal  
 Multiplier : 1.0000  
 Dilution : 1.0000  
 Use Multiplier & Dilution Factor with ISTDs

Signal 1: DAD1 A, Sig=254,4 Ref=360,100

| Peak # | RetTime [min] | Type | Width [min] | Area [mAU*s] | Height [mAU] | Area %  |
|--------|---------------|------|-------------|--------------|--------------|---------|
| 1      | 14.050        | VV   | 0.2400      | 3876.58936   | 240.51472    | 91.6754 |
| 2      | 19.948        | MM   | 0.4565      | 352.01532    | 12.85077     | 8.3246  |

Totals : 4228.60468 253.36550

HPLC Chromatogram of compound **7c**

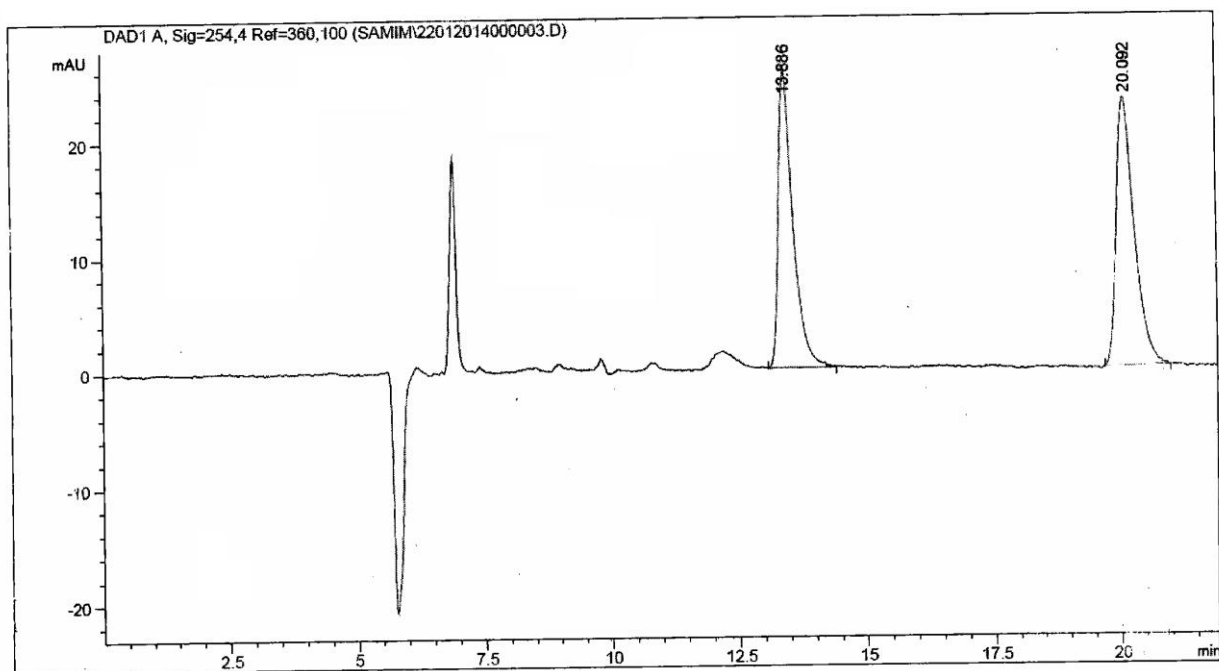

=====  
 Area Percent Report  
 =====

Sorted By : Signal  
 Multiplier : 1.0000  
 Dilution : 1.0000  
 Use Multiplier & Dilution Factor with ISTDs.

Signal 1: DAD1 A, Sig=254,4 Ref=360,100

| Peak # | RetTime [min] | Type | Width [min] | Area [mAU*s] | Height [mAU] | Area %  |
|--------|---------------|------|-------------|--------------|--------------|---------|
| 1      | 13.886        | BB   | 0.2947      | 507.66916    | 25.67156     | 47.0563 |
| 2      | 20.092        | BB   | 0.3593      | 571.18518    | 23.19553     | 52.9437 |

Totals : 1078.85434 48.86709

HPLC Chromatogram of compound ( $\pm$ )7c

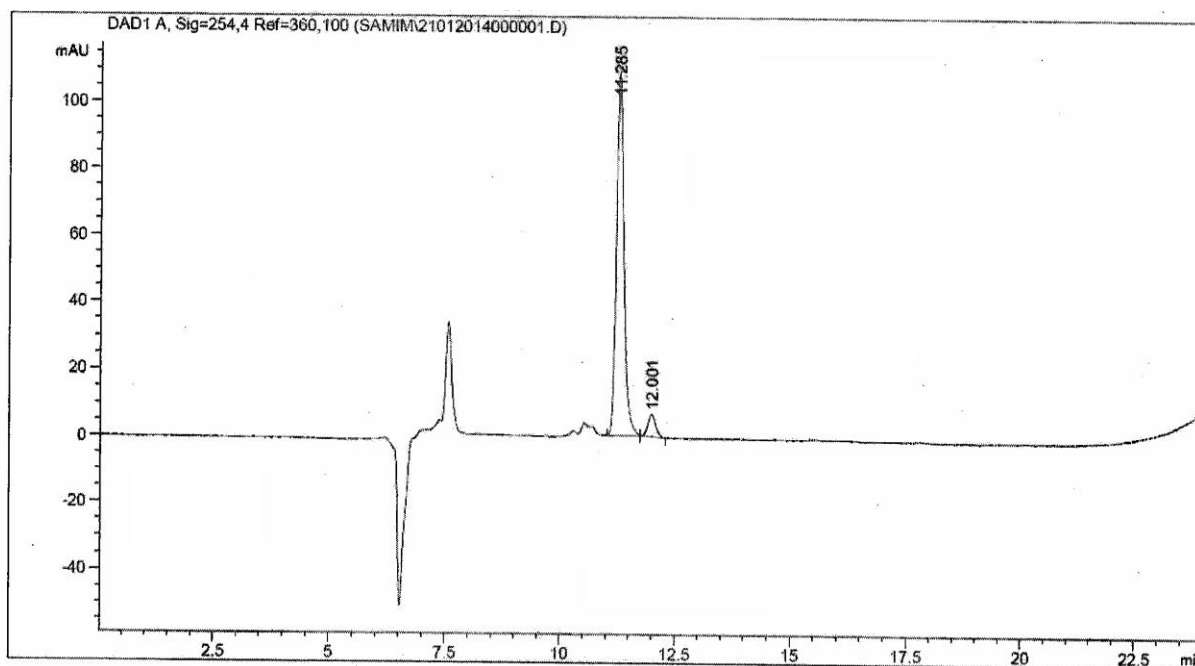

=====  
 Area Percent Report  
 =====

Sorted By : Signal  
 Multiplier : 1.0000  
 Dilution : 1.0000  
 Use Multiplier & Dilution Factor with ISTDs

Signal 1: DAD1 A, Sig=254,4 Ref=360,100

| Peak # | RetTime [min] | Type | Width [min] | Area [mAU*s] | Height [mAU] | Area %  |
|--------|---------------|------|-------------|--------------|--------------|---------|
| 1      | 11.285        | BB   | 0.1727      | 1234.79846   | 108.57613    | 94.1664 |
| 2      | 12.001        | BB   | 0.1808      | 76.49517     | 6.62057      | 5.8336  |

Totals : 1311.29363 115.19670

HPLC Chromatogram of compound **7d**

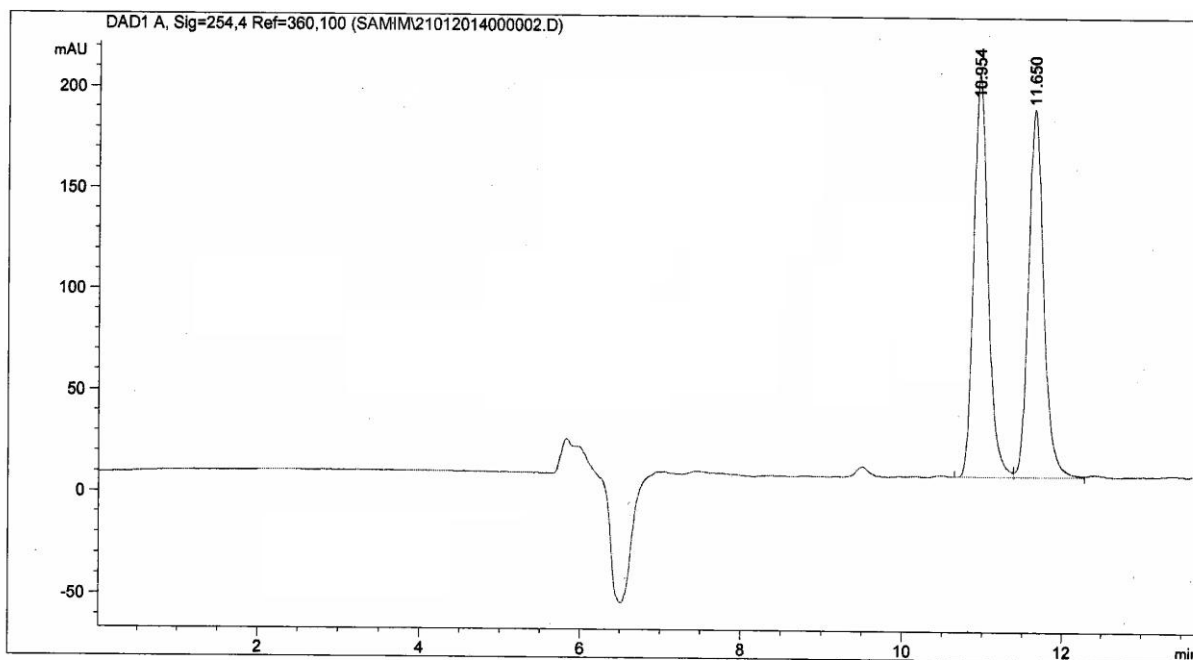

=====  
 Area Percent Report  
 =====

Sorted By : Signal  
 Multiplier : 1.0000  
 Dilution : 1.0000  
 Use Multiplier & Dilution Factor with ISTDs

Signal 1: DAD1 A, Sig=254,4 Ref=360,100

| Peak # | RetTime [min] | Type | Width [min] | Area [mAU*s] | Height [mAU] | Area %  |
|--------|---------------|------|-------------|--------------|--------------|---------|
| 1      | 10.954        | BV   | 0.1924      | 2503.32202   | 199.42719    | 50.7857 |
| 2      | 11.650        | VV   | 0.2036      | 2425.86621   | 181.90038    | 49.2143 |

Totals : 4929.18823 381.32756

=====  
 \*\*\* End of Report \*\*\*

HPLC Chromatogram of compound ( $\pm$ )**7d**

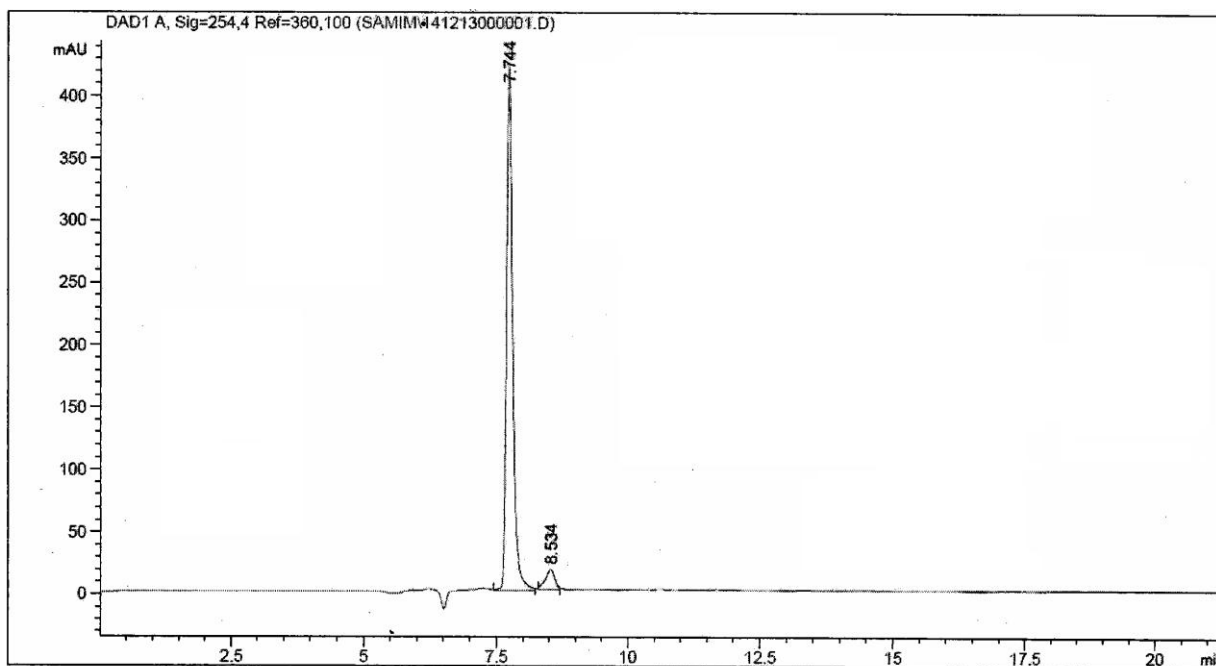

=====  
Area Percent Report  
=====

Sorted By : Signal  
Multiplier : 1.0000  
Dilution : 1.0000  
Use Multiplier & Dilution Factor with ISTDs

Signal 1: DAD1 A, Sig=254,4 Ref=360,100

| Peak # | RetTime [min] | Type | Width [min] | Area [mAU*s] | Height [mAU] | Area %  |
|--------|---------------|------|-------------|--------------|--------------|---------|
| 1      | 7.744         | MM   | 0.1363      | 3438.10742   | 420.31680    | 94.7960 |
| 2      | 8.534         | MM   | 0.1986      | 188.74185    | 15.83874     | 5.2040  |

Totals : 3626.84927 436.15555

HPLC Chromatogram of compound **13a**

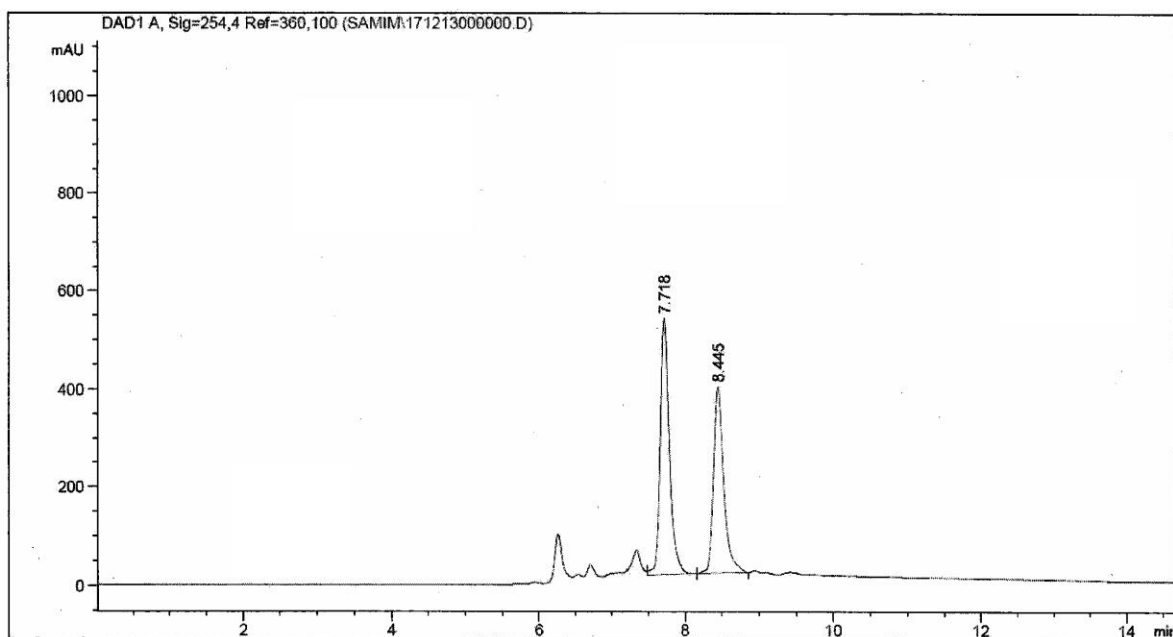

=====  
 Area Percent Report  
 =====

Sorted By : Signal  
 Multiplier : 1.0000  
 Dilution : 1.0000  
 Use Multiplier & Dilution Factor with ISTDs

Signal 1: DAD1 A, Sig=254,4 Ref=360,100

| Peak # | RetTime [min] | Type | Width [min] | Area [mAU*s] | Height [mAU] | Area %  |
|--------|---------------|------|-------------|--------------|--------------|---------|
| 1      | 7.718         | VB   | 0.1313      | 4539.03760   | 522.71881    | 55.4352 |
| 2      | 8.445         | BB   | 0.1441      | 3648.97461   | 379.72943    | 44.5648 |

Totals : 8188.01221 902.44824

HPLC Chromatogram of compound ( $\pm$ )**13a**

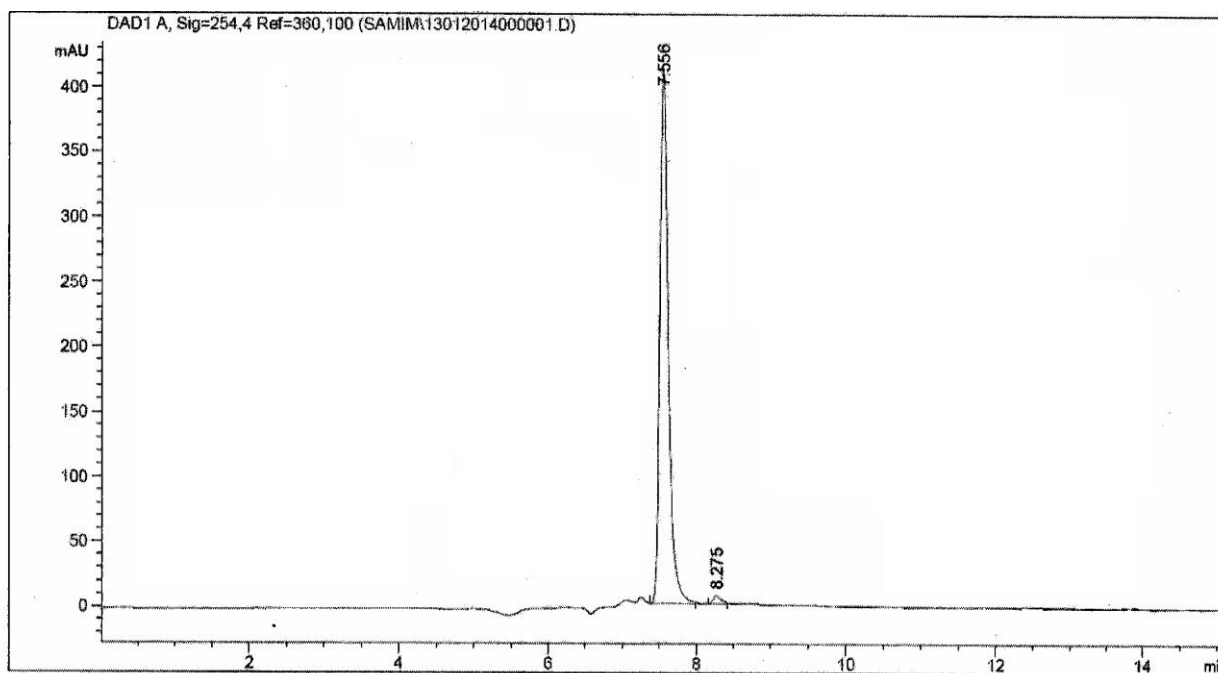

=====  
 Area Percent Report  
 =====

Sorted By : Signal  
 Multiplier : 1.0000  
 Dilution : 1.0000  
 Use Multiplier & Dilution Factor with ISTDs

Signal 1: DAD1 A, Sig=254,4 Ref=360,100

| Peak # | RetTime [min] | Type | Width [min] | Area [mAU*s] | Height [mAU] | Area %  |
|--------|---------------|------|-------------|--------------|--------------|---------|
| 1      | 7.556         | MM   | 0.1316      | 3242.59375   | 410.75418    | 98.6723 |
| 2      | 8.275         | MM   | 0.1210      | 43.63268     | 6.00773      | 1.3277  |

Totals : 3286.22643 416.76191

=====  
 \*\*\* End of Report \*\*\*

HPLC Chromatogram of compound **13c**

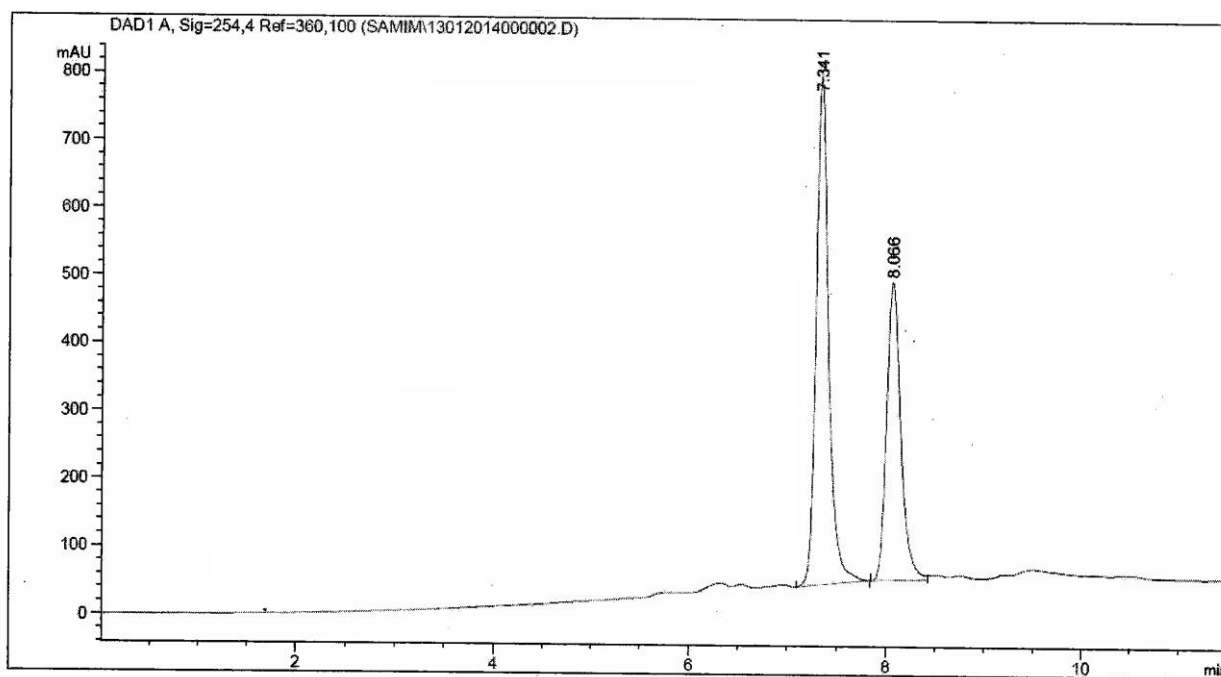

=====  
 Area Percent Report  
 =====

Sorted By : Signal  
 Multiplier : 1.0000  
 Dilution : 1.0000  
 Use Multiplier & Dilution Factor with ISTDs

Signal 1: DAD1 A, Sig=254,4 Ref=360,100

| Peak # | RetTime [min] | Type | Width [min] | Area [mAU*s] | Height [mAU] | Area %  |
|--------|---------------|------|-------------|--------------|--------------|---------|
| 1      | 7.341         | BB   | 0.1325      | 6606.39648   | 751.66797    | 60.0601 |
| 2      | 8.066         | BV   | 0.1524      | 4393.25537   | 440.16150    | 39.9399 |

Totals : 1.09997e4 1191.82947

=====  
 \*\*\* End of Report \*\*\*

HPLC Chromatogram of compound (±)13c

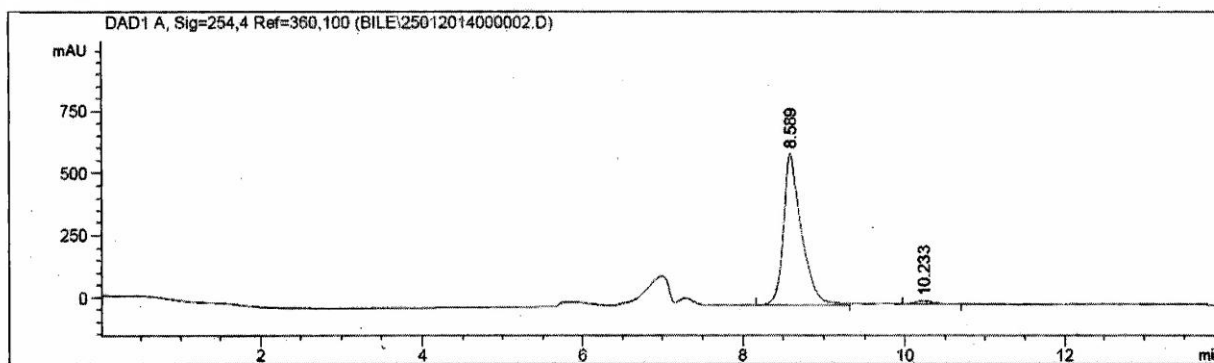

=====  
 Area Percent Report  
 =====

Sorted By : Signal  
 Multiplier : 1.0000  
 Dilution : 1.0000  
 Use Multiplier & Dilution Factor with ISTDs

Signal 1: DAD1 A, Sig=254,4 Ref=360,100

| Peak # | RetTime [min] | Type | Width [min] | Area [mAU*s] | Height [mAU] | Area %  |
|--------|---------------|------|-------------|--------------|--------------|---------|
| 1      | 8.589         | BV   | 0.2166      | 9292.20215   | 607.05902    | 97.6260 |
| 2      | 10.233        | MM   | 0.2669      | 225.96506    | 14.11243     | 2.3740  |

Totals : 9518.16721 621.17145

HPLC Chromatogram of compound **13b**

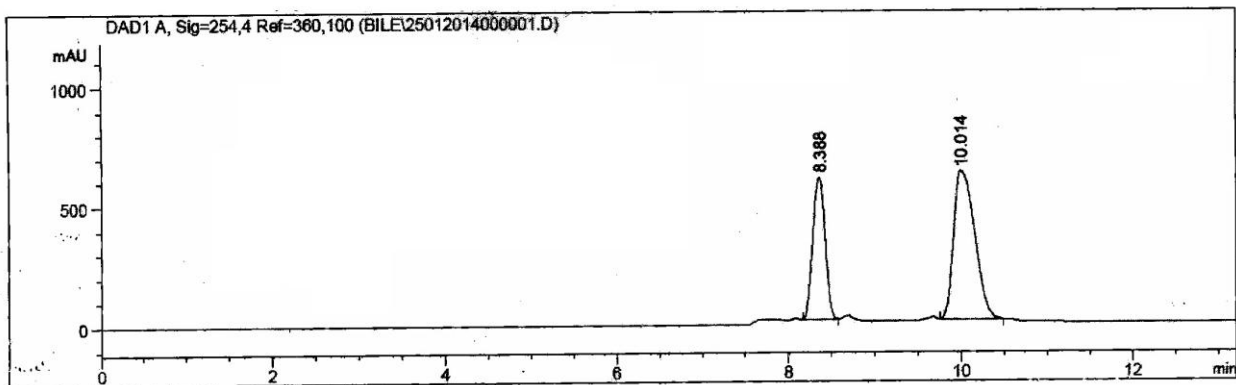

=====  
 Area Percent Report  
 =====

Sorted By : Signal  
 Multiplier : 1.0000  
 Dilution : 1.0000  
 Use Multiplier & Dilution Factor with ISTDs

Signal 1: DAD1 A, Sig=254,4 Ref=360,100

| Peak # | RetTime [min] | Type | Width [min] | Area [mAU*s] | Height [mAU] | Area %  |
|--------|---------------|------|-------------|--------------|--------------|---------|
| 1      | 8.388         | BV   | 0.1047      | 3471.89844   | 618.80661    | 39.5818 |
| 2      | 10.014        | VB   | 0.1875      | 5299.55859   | 630.96927    | 60.4182 |

Totals : 8771.45703 1249.77588

HPLC Chromatogram of compound ( $\pm$ )**13b**

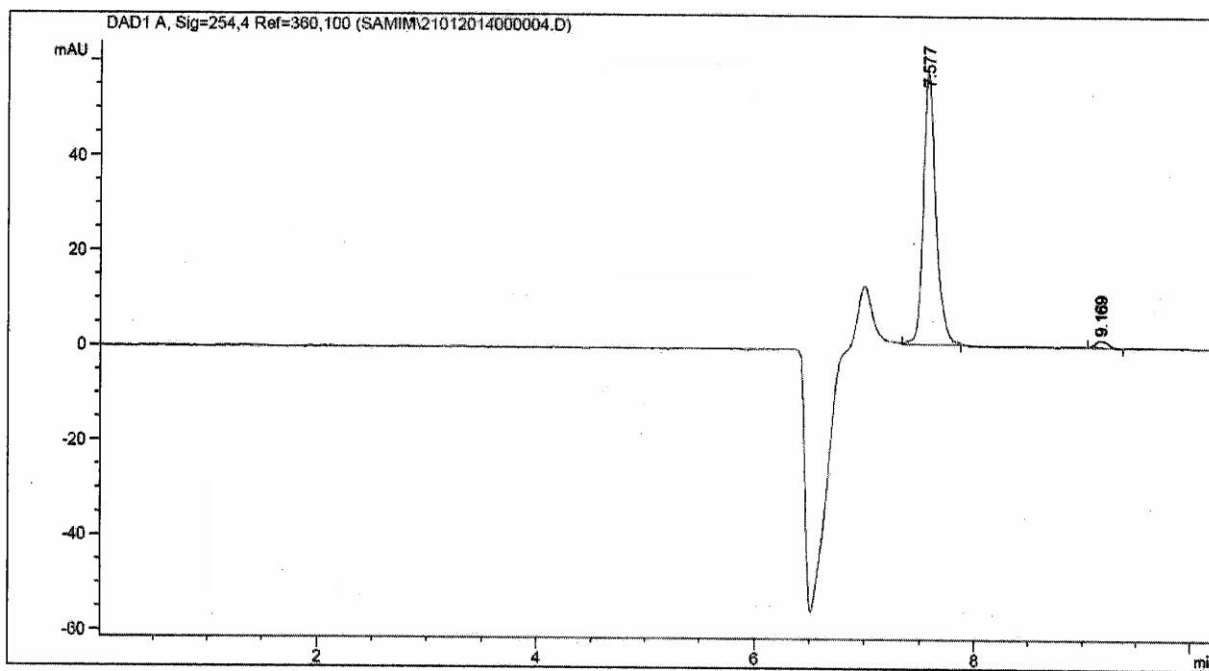

=====  
 Area Percent Report  
 =====

Sorted By : Signal  
 Multiplier : 1.0000  
 Dilution : 1.0000  
 Use Multiplier & Dilution Factor with ISTDs

Signal 1: DAD1 A, Sig=254,4 Ref=360,100

| Peak # | RetTime [min] | Type | Width [min] | Area [mAU*s] | Height [mAU] | Area %  |
|--------|---------------|------|-------------|--------------|--------------|---------|
| 1      | 7.577         | MM   | 0.1364      | 468.41809    | 57.22437     | 97.4516 |
| 2      | 9.169         | BB   | 0.1379      | 12.24937     | 1.46005      | 2.5484  |

Totals : 480.66747 58.68441

HPLC Chromatogram of compound **13d**

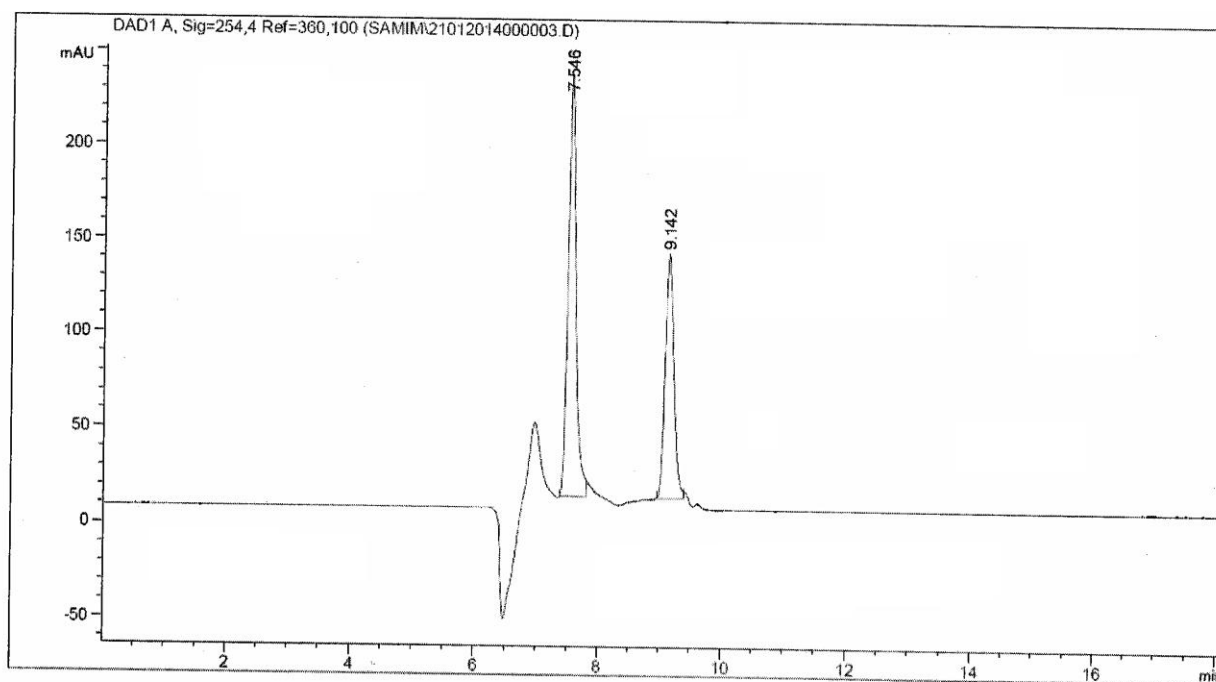

=====  
 Area Percent Report  
 =====

Sorted By : Signal  
 Multiplier : 1.0000  
 Dilution : 1.0000  
 Use Multiplier & Dilution Factor with ISTDs

Signal 1: DAD1 A, Sig=254,4 Ref=360,100

| Peak # | RetTime [min] | Type | Width [min] | Area [mAU*s] | Height [mAU] | Area %  |
|--------|---------------|------|-------------|--------------|--------------|---------|
| 1      | 7.546         | MM   | 0.1483      | 1980.97546   | 222.58321    | 60.9675 |
| 2      | 9.142         | MM   | 0.1635      | 1268.25403   | 129.26903    | 39.0325 |

Totals : 3249.22949 351.85223

HPLC Chromatogram of compound ( $\pm$ )**13d**

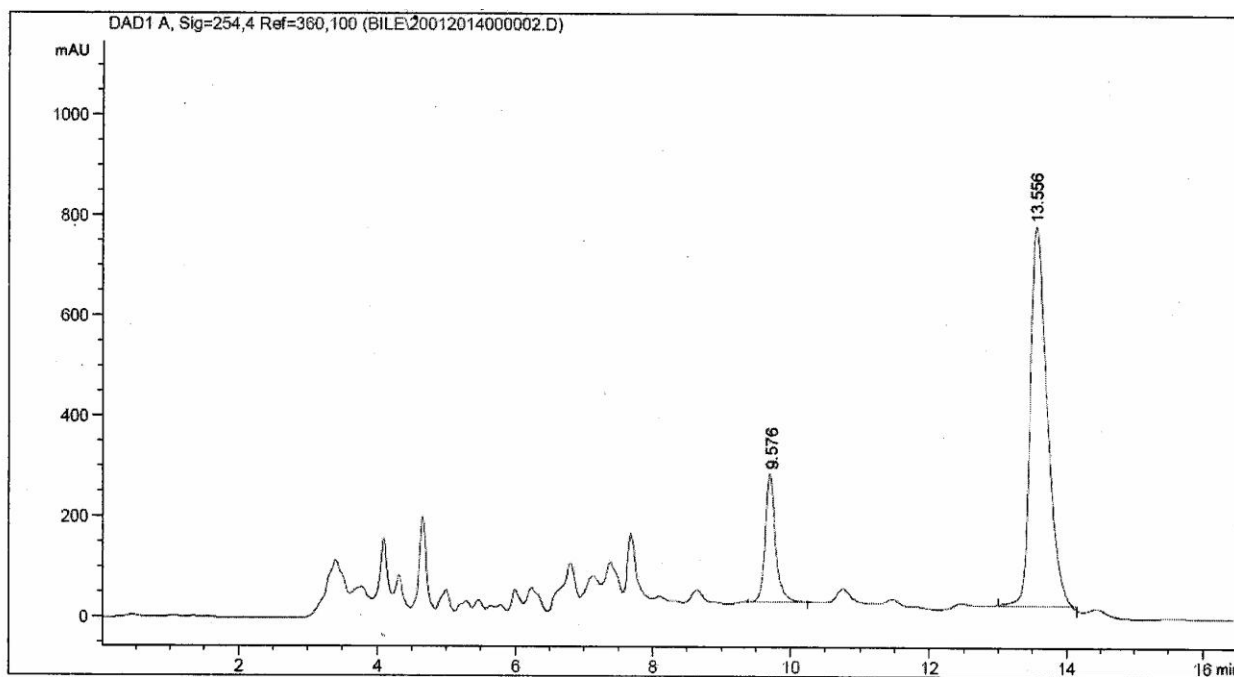

=====  
 Area Percent Report  
 =====

Sorted By : Signal  
 Multiplier : 1.0000  
 Dilution : 1.0000  
 Use Multiplier & Dilution Factor with ISTDs

Signal 1: DAD1 A, Sig=254,4 Ref=360,100

| Peak # | RetTime [min] | Type | Width [min] | Area [mAU*s] | Height [mAU] | Area %  |
|--------|---------------|------|-------------|--------------|--------------|---------|
| 1      | 9.576         | MM   | 0.1583      | 2161.94385   | 227.62804    | 14.1873 |
| 2      | 13.556        | MM   | 0.2884      | 1.30767e4    | 755.71600    | 85.8127 |

Totals : 1.52386e4 983.34404

HPLC Chromatogram of compound 2a'

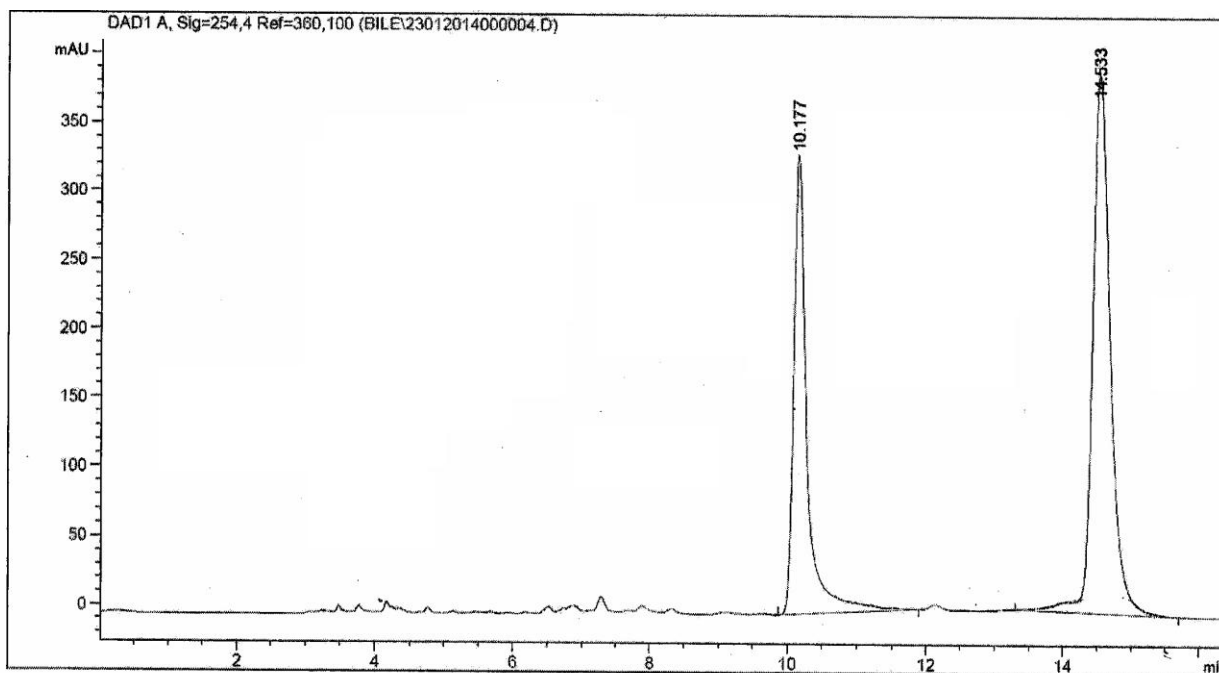

=====  
 Area Percent Report  
 =====

Sorted By : Signal  
 Multiplier : 1.0000  
 Dilution : 1.0000  
 Use Multiplier & Dilution Factor with ISTDs

Signal 1: DAD1 A, Sig=254,4 Ref=360,100

| Peak # | RetTime [min] | Type | Width [min] | Area [mAU*s] | Height [mAU] | Area %  |
|--------|---------------|------|-------------|--------------|--------------|---------|
| 1      | 10.177        | BB   | 0.1946      | 4409.58984   | 332.84210    | 38.2256 |
| 2      | 14.533        | BB   | 0.2723      | 7126.11621   | 391.59109    | 61.7744 |

Totals : 1.15357e4 724.43320

HPLC Chromatogram of compound ( $\pm$ ) **2a'**
